1 **Constitutive Steroidal Glycoalkaloid Biosynthesis in Tomato is Regulated by the Clade IIIe**  
2 **Basic Helix-Loop-Helix Transcription Factors MYC1 and MYC2<sup>[W]</sup>**

3 **Gwen Swinnen,<sup>a,b</sup> Margaux De Meyer,<sup>a,b</sup> Jacob Pollier,<sup>a,b,c</sup>, Francisco Javier Molina-**  
4 **Hidalgo,<sup>a,b</sup> Evi Ceulemans,<sup>a,b</sup> Rebecca De Clercq,<sup>a,b</sup> Robin Vanden Bossche,<sup>a,b</sup> Patricia**  
5 **Fernández-Calvo,<sup>a,b,1</sup> Mily Ron,<sup>d</sup> Laurens Pauwels,<sup>a,b</sup> and Alain Goossens,<sup>a,b,2</sup>**

6 <sup>a</sup>Ghent University, Department of Plant Biotechnology and Bioinformatics, 9052 Ghent, Belgium

7 <sup>b</sup>VIB Center for Plant Systems Biology, 9052 Ghent, Belgium

8 <sup>c</sup>VIB Metabolomics Core, 9052 Ghent, Belgium

9 <sup>d</sup>University of California, Davis, Department of Plant Biology, Davis, California

10 95616, USA

11 ORCID IDs: 0000-0002-4438-0098 (G.S.); 0000-0002-6961-0769 (M.D.M); 0000-0002-1134-  
12 9238 (J.P.); 0000-0003-1184-6354 (F.J.M.H.); 0000-0002-3083-5768 (E.C.); 0000-0002-4068-  
13 1811 (R.D.C.); 0000-0002-4593-9658 (R.V.B.); 0000-0002-1576-9651 (P.F.C.); 0000-0003-  
14 1682-7275 (M.R.); 0000-0002-0221-9052 (L.P.); 0000-0002-1599-551X (A.G.)

15 Corresponding author:

16 Alain Goossens

17 VIB-UGent Center for Plant Systems Biology

18 Technologiepark 71, B-9052 Gent (Belgium)

19 Tel.: +32 9 331 38 51; Fax: +32 9 331 38 09

20 E-mail: [alain.goossens@psb-vib.ugent.be](mailto:alain.goossens@psb-vib.ugent.be)

21 Short title: MYC1 and MYC2 control constitutive SGA production

22 One sentence summary: The clade IIIe basic helix-loop-helix transcription factors MYC1 and  
23 MYC2 control the constitutive biosynthesis of tomato steroidal glycoalkaloids and might do so  
24 independently of jasmonate signaling.

25 Footnotes:

26 <sup>1</sup>Present address: Centre for Plant Biotechnology and Genomics, Parque Científico y  
27 Tecnológico, UPM Campus de Montegancedo, 28223 Madrid, Spain

28 <sup>2</sup>Address correspondence to [alain.goossens@psb-vib.ugent.be](mailto:alain.goossens@psb-vib.ugent.be).

29 The author(s) responsible for distribution of materials integral to the findings presented in this  
30 article in accordance with the policy described in the Instructions for Authors  
31 ([www.plantcell.org](http://www.plantcell.org)) is (are): Alain Goossens ([alain.goossens@psb.vib-ugent.be](mailto:alain.goossens@psb.vib-ugent.be)).

32 <sup>[W]</sup>Online version contains Web-only data.

33 **ABSTRACT**

34 **Specialized metabolites are produced by plants to fend off biotic enemies. Across the plant kingdom,**  
35 **the biosynthesis of these defense compounds is promoted by jasmonate signaling in which clade IIIe**  
36 **basic helix-loop-helix (bHLH) transcription factors take on a central role. Tomato (*Solanum***  
37 ***lycopersicum*) produces cholesterol-derived steroidal glycoalkaloids (SGAs) that act as**  
38 **phytoanticipins against a broad variety of herbivores and pathogens. The biosynthesis of SGAs**  
39 **from cholesterol occurs constitutively in tomato plants and can be further stimulated by jasmonates.**  
40 **Here, we demonstrate that the two tomato clade IIIe bHLH transcription factors, MYC1 and**  
41 **MYC2, redundantly and specifically control the constitutive biosynthesis of SGAs. Double *myc1***  
42 ***myc2* loss-of-function tomato hairy roots displayed suppressed constitutive expression of cholesterol**  
43 **and SGA biosynthesis genes, and consequently severely reduced levels of the main tomato SGAs  $\alpha$ -**  
44 **tomatine and dehydrotomatine. In contrast, basal expression of genes involved in canonical**  
45 **jasmonate signaling or in the biosynthesis of highly jasmonate-inducible phenylpropanoid-**  
46 **polyamine conjugates was not affected. Furthermore, CRISPR-Cas9(VQR)-mediated genome**  
47 **editing of a specific *cis*-regulatory element, targeted by MYC1/2, in the promoter of a cholesterol**  
48 **biosynthesis gene led to decreased constitutive expression of this gene, but did not affect its**  
49 **jasmonate inducibility. Our results demonstrate that clade IIIe bHLH transcriptional regulators**  
50 **might have evolved to regulate the biosynthesis of specific constitutively accumulating specialized**  
51 **metabolites independent of jasmonate signaling.**

## 52 INTRODUCTION

53 Plants produce species-specific specialized metabolites to defend themselves against natural  
54 enemies, such as herbivores and pathogens. Several *Solanaceae* species, including tomato  
55 (*Solanum lycopersicum*), potato (*S. tuberosum*) and eggplant (*S. melongena*), synthesize steroidal  
56 glycoalkaloids (SGAs). These nitrogen-containing compounds with a terpenoid skeleton  
57 accumulate constitutively in many plant organs, thereby forming a chemical barrier that helps the  
58 plant to protect itself against a broad range of biotic agents (Friedman, 2002). The main tomato  
59 SGAs,  $\alpha$ -tomatine and dehydrotomatine, are present in nearly all plant organs, including leaves,  
60 roots, flowers and immature green fruits (Friedman and Levin, 1998; Kozukue et al., 2004). As  
61 the fruits mature and ripen, *de novo* SGA synthesis terminates and  $\alpha$ -tomatine and  
62 dehydrotomatine are converted into esculeosides and dehydroesculeosides, respectively, the  
63 predominant SGAs in ripe fruits (Yamanaka et al., 2009; Cárdenas et al., 2019; Nakayasu et al.,  
64 2020).

65 Cholesterol, which in plants is derived from cycloartenol, is the biosynthetic precursor for  
66 SGAs. Cycloartenol is produced via the cytosolic mevalonate pathway and forms the branch  
67 point between cholesterol and phytosterol biosynthesis. Gene duplication and divergence from  
68 phytosterol biosynthetic genes accounts for half of the cholesterologenesis genes (Sawai et al.,  
69 2014; Sonawane et al., 2016). The other cholesterol biosynthesis genes are shared between the  
70 cholesterol and phytosterol pathway (Sonawane et al., 2016). A set of *GLYCOALKALOID*  
71 *METABOLISM (GAME)* genes that are partially organized in metabolic gene clusters, are  
72 responsible for the biosynthesis of SGAs from cholesterol (Itkin et al., 2011; Itkin et al., 2013;  
73 Sonawane et al., 2018). In a first series of reactions catalyzed by a subset of the GAME proteins,  
74 cholesterol is converted into SGA aglycones via multiple biosynthetic steps, including the  
75 transamination of the sterol backbone (Itkin et al., 2013; Sonawane et al., 2018). Subsequently,  
76 these steroidal alkaloids are glycosylated by uridine diphosphate (UDP) glycosyltransferases to  
77 form SGAs (Itkin et al., 2011; Itkin et al., 2013).

78 The conserved jasmonate (JA) signaling pathway is widely recognized to induce  
79 specialized metabolism upon herbivore or necrotrophic pathogen attack in many plant species  
80 (De Geyter et al., 2012; Wasternack and Strnad, 2019). The oxylipin-derived JA hormone  
81 regulates the expression of its target genes by controlling the activity of certain transcription  
82 factors (TFs) that belong to, among others, the basic helix-loop-helix (bHLH) family (Goossens

83 et al., 2017). At low intracellular concentrations of the bioactive (+)-7-*iso*-jasmonoyl-L-  
84 isoleucine (JA-Ile) (Fonseca et al., 2009), the activity of these TFs is repressed by the JA ZIM  
85 DOMAIN (JAZ) proteins (Chini et al., 2007; Thines et al., 2007; Chini et al., 2016). Elevated  
86 intracellular JA-Ile concentrations promote the formation of a co-receptor complex between the  
87 JAZ proteins and the F-box protein CORONATINE INSENSITIVE1 (COI1) (Yan et al., 2009;  
88 Sheard et al., 2010; Yan et al., 2018), which leads to the ubiquitination and subsequent  
89 proteasomal degradation of the interacting JAZ protein (Chini et al., 2007; Thines et al., 2007).  
90 This releases the TFs from repression and is followed by the concerted upregulation of multiple  
91 genes involved in the same species-specific specialized metabolic pathway (De Geyter et al.,  
92 2012; Wasternack and Strnad, 2019).

93 In tomato and potato, the JA-regulated TF GAME9, which belongs to the  
94 APETALA2/Ethylene Response Factor (AP2/ERF) family and is also known as JA-  
95 RESPONSIVE ERF 4 (JRE4), is involved in the co-regulation of SGA and cholesterol  
96 biosynthesis (Cárdenas et al., 2016; Thagun et al., 2016; Nakayasu et al., 2018). At least for a  
97 subset of the cholesterol and SGA biosynthesis genes, GAME9 appears to control their  
98 expression in cooperation with tomato MYC2, an ortholog of *Arabidopsis thaliana* (Arabidopsis)  
99 MYC2, with GAME9 and MYC2 recognizing GC-rich and G-box elements, respectively, in their  
100 target promoters (Cárdenas et al., 2016; Thagun et al., 2016). Arabidopsis MYC2 and its  
101 orthologs in other species, including tomato MYC2, are members of the clade IIIe bHLH TFs,  
102 which take on a central role in the JA signaling cascade across the plant kingdom (Boter et al.,  
103 2004; Kazan and Manners, 2013; Du et al., 2017; Goossens et al., 2017). Besides MYC2, tomato  
104 possesses a second clade IIIe bHLH TF, MYC1, which was shown to regulate mono- and  
105 sesquiterpene biosynthesis in the type VI glandular trichomes of tomato leaves and stems  
106 (Spyropoulou et al., 2014; Xu et al., 2018), but that has not been implicated in the regulation of  
107 SGA biosynthesis yet.

108 In this study, we demonstrate that tomato MYC2, together with its homolog MYC1, is  
109 instrumental for the basal, but high SGA content in tomato organs. These two clade IIIe bHLH  
110 TFs ensure constitutive SGA biosynthesis by redundantly controlling basal expression of both  
111 cholesterol and SGA pathway genes. Although MYC-regulated specialized metabolism is  
112 typically induced following an elevation in intracellular JA-Ile levels, we found that the  
113 constitutive production of SGAs only partially relies on COI1-dependent JA signaling. Finally,

114 CRISPR-Cas9(VQR) genome editing of an endogenous G-box, which is targeted by MYC1/2, in  
115 the promoter of the cholesterol biosynthesis gene *STEROL C-5(6) DESATURASE 2 (C5-SD2)*  
116 leads to decreased constitutive expression of *C5-SD2*. This further supports the role of the tomato  
117 clade IIIe bHLH TFs in the regulation of constitutive SGA biosynthesis.

## 118 **RESULTS**

### 119 **MYC2 Coordinates Constitutive Expression of SGA Biosynthesis Genes**

120 To enhance our understanding of MYC2 as a regulator of SGA production, we consulted  
121 previously published RNA-seq data from wild-type and *MYC2-RNAi* seedlings (cultivar M82)  
122 (Du et al., 2017). Among the differentially expressed genes (DEGs) between mock-treated wild-  
123 type and *MYC2-RNAi* plants (false discovery rate [FDR]-adjusted P value < 0.05), we  
124 encountered genes known to be involved in the biosynthesis of SGAs and their precursors (Table  
125 1). Indeed, transcript levels of genes encoding enzymes for cycloartenol, cholesterol, and SGA  
126 biosynthesis were all significantly reduced in mock-treated *MYC2-RNAi* seedlings compared with  
127 wild-type seedlings (Table 1), indicating that MYC2 helps ensure their basal expression.

128 To further investigate the potential role of MYC2 as a transcriptional activator of  
129 constitutive SGA biosynthesis, we generated three independent *myc2* loss-of-function hairy root  
130 lines (cultivar MoneyMaker) using Clustered Regularly Interspaced Short Palindromic Repeats  
131 (CRISPR)-CRISPR associated protein 9 (CRISPR-Cas9) genome editing (Figure 1A and  
132 Supplemental Figure 1). We selected nine genes from the list of DEGs involved in SGA  
133 biosynthesis (Table 1) and measured their expression by quantitative real-time PCR (qPCR) in  
134 mock- and JA-treated control and *myc2* lines. Expression of several of these genes was  
135 significantly reduced in mock-treated *myc2* hairy root lines compared with control lines (Figure  
136 1B) while their JA inducibility, however, remained intact (Supplemental Figure 2). Expression of  
137 *GAME9*, a known regulator of SGA biosynthesis, was comparable between mock-treated control  
138 and *myc2* root lines (Figure 1B). Targeted metabolite profiling showed there was only a small  
139 decrease in  $\alpha$ -tomatine and dehydrotomatine levels between control and *myc2* hairy roots in both  
140 mock- and JA-treated conditions (Figure 1C). We did not observe a significant increase of these  
141 SGAs upon JA induction, in our hands, neither in control lines nor in *myc2* lines. Taken together,  
142 these observations suggest that besides MYC2, another JA-regulated TF is involved in the  
143 regulation of constitutive SGA production.

144 For comparison, we measured the expression of a gene involved in JA signaling, *JAZ1*  
145 (Sun et al., 2011), and a gene involved in the biosynthesis of polyamines, *ORNITHINE*  
146 *DECARBOXYLASE* (*ODC*) (Acosta et al., 2005), which were previously reported to be  
147 upregulated upon JA treatment (Chen et al., 2006; Chini et al., 2017). In contrast to the  
148 downregulation of several SGA pathway genes in mock-treated *myc2* lines (Figure 1B), the  
149 expression of *JAZ1* and *ODC* was not reduced in mock-treated *myc2* lines compared to control  
150 lines (Figure 2A). The JA inducibility of *JAZ1* and *ODC* transcription in *myc2* hairy roots was  
151 not affected either (Figure 2A). Next, we determined the levels of two phenylpropanoid-  
152 polyamine conjugates, tris(dihydrocaffeoyl)spermine and *N*-caffeoylputrescine, which are both  
153 reported to be highly JA-inducible compounds (Chen et al., 2006). While the levels of two main  
154 SGAs were decreased between mock-treated control and *myc2* hairy roots (Figure 1C), the levels  
155 of tris(dihydrocaffeoyl)spermine and *N*-caffeoylputrescine were not (Figure 2B). JA-treated *myc2*  
156 lines, however, accumulated less of these polyamines than JA-treated control lines did (Figure  
157 2B). These results suggest that MYC2 specifically regulates the constitutive biosynthesis of  
158 SGAs and not of other specialized metabolites such as the phenylpropanoid-polyamine  
159 conjugates. Conversely, MYC2 is clearly involved, together with other, yet elusive, TFs, in the  
160 induction of phenylpropanoid-polyamine conjugate biosynthesis upon JA signaling.

### 161 **Tomato Has Two bHLH Clade IIIe Family Members**

162 The intact JA inducibility but reduced basal expression of SGA pathway genes and the slight  
163 decrease of two main SGAs in *myc2* hairy root lines (Supplemental Figure 2 and Figure 1B–C)  
164 suggested that another JA-regulated TF is involved in the regulation of SGA biosynthesis. In  
165 Arabidopsis, bHLH clade IIIe consists of MYC2 and three other MYC TFs that all contribute to  
166 the JA response (Goossens et al., 2017). Therefore, using the PLAZA comparative genomics  
167 platform (Van Bel et al., 2018), we searched for other tomato orthologs of Arabidopsis MYC2  
168 and only identified MYC1, a regulator of type VI glandular trichome development and volatile  
169 terpene biosynthesis within trichomes (Spyropoulou et al., 2014; Xu et al., 2018). Phylogenetic  
170 analysis revealed that duplication of an Arabidopsis *MYC2* ortholog must have occurred at the  
171 base of the Solanaceae and that both copies were retained in the *S. lycopersicum* genome (Figure  
172 3A) as is the case with several other Solanaceae species (Xu et al., 2017). While the Arabidopsis  
173 bHLH clade IIIe consists of MYC2, MYC3, MYC4, and MYC5, it appears to be limited to only

174 two members in Solanaceae species (Figure 3A). A survey of public transcriptome data (cultivar  
175 Heinz 1706) (Zouine et al., 2017) showed that the two tomato clade IIIe bHLH members, *MYC1*  
176 and *MYC2*, exhibit a similar expression pattern (Figure 3B). In addition, transcript levels of both  
177 of these TFs were increased upon JA treatment of control hairy roots (Figure 3C). Although  
178 *MYC1* and *MYC2* may have distinct roles, such as in the regulation of glandular trichome  
179 development and volatile terpene biosynthesis, which specifically involves *MYC1* but not *MYC2*  
180 (Spyropoulou et al., 2014; Xu et al., 2018), our data indicate that *MYC1* and *MYC2* might have  
181 overlapping functions as well.

### 182 ***MYC1* and *MYC2* Redundantly Control SGA Biosynthesis**

183 Previously, we reported that *MYC2* and *GAME9* act synergistically to transactivate the promoter  
184 of *C5-SD2*, a gene involved in cholesterologenesis, when fused to the *FIREFLY LUCIFERASE*  
185 (*fluc*) gene in tobacco (*Nicotiana tabacum*) protoplasts (Cárdenas et al., 2016). Here, we show  
186 that a similar cooperative action can be observed between *MYC1* and *GAME9* (Figure 4A). A G-  
187 box present within the *C5-SD2* promoter was formerly found to be bound by *MYC2* and to be  
188 essential for the transactivation of this promoter by the combined action of *MYC2* and *GAME9*  
189 (Cárdenas et al., 2016). Mutating that same G-box in a 333-bp *C5-SD2* promoter region, which  
190 was shown to be sufficient for synergistic transactivation by *MYC1/MYC2* and *GAME9* (Figure  
191 4B), led to severely reduced induction of the luciferase activity (Figure 4C), while no luciferase  
192 induction was measured for a promoter deletion construct lacking the G-box (Figure 4C). Thus,  
193 these data indicate that *MYC1* might play a similar role as *MYC2* in regulating SGA biosynthesis  
194 by binding the G-box in the promoters of SGA pathway genes and activating their expression in  
195 synergy with *GAME9*.

196 To explore whether *MYC1* is indeed a regulator of SGA production *in planta*, we  
197 generated three independent *myc1* loss-of-function hairy root lines (cultivar Moneymaker) using  
198 CRISPR-Cas9 genome editing (Figure 5A and Supplemental Figure 3). A qPCR analysis of  
199 cycloartenol, cholesterol, and SGA biosynthesis genes revealed that some of them were  
200 significantly downregulated in mock-treated *myc1* hairy roots (Figure 5B), whereas no effect was  
201 observed on their JA inducibility (Supplemental Figure 4). We checked if the lack of JA-  
202 inducible effects in *myc1* and *myc2* single mutants could be explained by a genetic compensation  
203 response (Ma et al., 2019), but we did not observe an upregulation of *MYC2* in *myc1* lines or vice



204 versa (Supplemental Figure 5). Levels of  $\alpha$ -tomatine and dehydrotomatine were not affected in  
205 *myc1* lines compared with control lines, neither in mock- nor in JA-treated conditions (Figure  
206 5C). The expression of *JAZ1* and *ODC* was unaltered in both mock- and JA-treated *myc1* hairy  
207 roots compared to control hairy roots (Figure 6A) and the levels of tris(dihydrocaffeoyl)spermine  
208 and *N*-caffeoylputrescine were only reduced between JA-treated control and *myc1* root lines  
209 (Figure 6B). These results are comparable to those observed for *myc2* lines (Figure 1–2),  
210 indicating that MYC1 and MYC2 might have redundant roles in regulating the constitutive  
211 production of SGAs and their precursors.

212 Next, we used CRISPR-Cas9 genome editing to target *MYC1* and *MYC2* simultaneously,  
213 which yielded one double *myc1 myc2* hairy root knockout line (Supplemental Figure 6). We  
214 measured the expression of both SGA and more upstream biosynthesis genes and observed  
215 severely reduced transcript levels for most of them in mock-treated *myc1 myc2* hairy roots  
216 compared with control hairy roots (Figure 7A), while no decrease was detected in the expression  
217 of *JAZ1* and *ODC* (Figure 8A). Upon JA treatment, the transcription of not only cholesterol and  
218 SGA biosynthesis genes but also of *JAZ1* and *ODC* was not induced or not as strongly induced  
219 anymore in the *myc1 myc2* line compared with the control lines (Supplemental Figure 7 and  
220 Figure 8A). In accordance with these observations, the *myc1 myc2* line exhibited a 60–90%  
221 decrease in  $\alpha$ -tomatine and dehydrotomatine content in both mock- and JA-treated conditions  
222 (Figure 7B). Although the biosynthesis of tris(dihydrocaffeoyl)spermine and *N*-  
223 caffeoylputrescine was no longer induced by JA in *myc1 myc2* hairy roots, their basal levels were  
224 not significantly reduced in *myc1 myc2* hairy roots compared to control hairy roots (Figure 8B).  
225 Thus, SGA pathway genes appear to be specifically affected while genes involved in canonical  
226 JA signaling and the biosynthesis of phenylpropanoid-polyamine conjugates are not. Taken  
227 together, these data demonstrate that MYC1 and MYC2 are functionally redundant in specifically  
228 controlling the constitutive biosynthesis of SGAs.

### 229 **SGA Biosynthesis Partially Depends on COI1-Mediated JA Signaling**

230 The primary JA signaling pathway is highly conserved in the plant kingdom (Chini et al., 2016)  
231 and is initiated by the perception of JA-Ile by a co-receptor complex consisting of the F-box  
232 protein COI1 and a JAZ repressor (Yan et al., 2009; Sheard et al., 2010; Yan et al., 2018).  
233 Subsequent proteasomal degradation of the interacting JAZ protein (Chini et al., 2007; Thines et

234 al., 2007) releases JA-regulated TFs from repression by JAZ (Chini et al., 2007; Thines et al.,  
235 2007; Chini et al., 2016). As in all investigated plant species, also in tomato the JAZ proteins can  
236 interact with MYC2 and, thereby, repress the transcription of MYC2-regulated genes (Du et al.,  
237 2017). Accordingly, COI1-dependent signaling has been suggested to be essential for JA-induced  
238 upregulation of SGA pathway genes (Abdelkareem et al., 2017). To investigate whether COI1  
239 activity is also involved or required for the constitutive production of SGAs, we generated three  
240 independent *coi1* loss-of-function hairy root lines (cultivar MoneyMaker) using CRISPR-Cas9  
241 genome editing (Figure 9A and Supplemental Figure 8). Basal expression of not only several  
242 SGA pathway genes but also of *JAZ1* and *ODC* was significantly reduced in *coi1* hairy roots  
243 compared with control hairy roots (Figure 9B and Figure 10A). As expected, the expression of  
244 SGA biosynthesis genes, *JAZ1*, and *ODC* was not induced when *coi1* lines were treated with JA  
245 (Supplemental Figure 9 and Figure 10A). Furthermore, the  $\alpha$ -tomatine and dehydrotomatine  
246 content in *coi1* hairy roots was decreased by 30–50% compared with control lines in both JA-  
247 and mock-treated conditions (Figure 9C), while tris(dihydrocaffeoyl)spermine and *N*-  
248 caffeoylputrescine levels were only reduced in JA-treated conditions (Figure 10B). This evidence  
249 suggests a partial dependence of constitutive SGA production on COI1-dependent signaling,  
250 possibly due to the stabilization and accumulation of JAZ proteins that block MYC1/2 activity.

### 251 **Genome Editing of a G-Box Decreases Constitutive *C5-SD2* Expression**

252 In all investigated mutant genotypes (*myc1*, *myc2*, *myc1 myc2*, and *coi1*), the cholesterologenesis  
253 gene *C5-SD2* showed the strongest decrease in gene expression (Figure 1B, 5B, 7A, and 9B).  
254 Transient expression assays in tobacco protoplasts showed that a G-box present within the *C5-SD2*  
255 promoter is necessary for the transactivation of this promoter by MYC1 or MYC2 in  
256 combination with GAME9 (Figure 4) (Cárdenas et al., 2016). To investigate the relevance of this  
257 G-box *in planta*, we decided to target this *cis*-regulatory element in tomato hairy roots by genome  
258 editing using an engineered version of Cas9 that recognizes 5'-NGA-3' as protospacer adjacent  
259 motif (PAM) (Kleinstiver et al., 2015). Three independent hairy root lines, denominated *g* lines,  
260 were generated in which the G-box motif was either deleted or disrupted. Line *g*<sup>#1</sup> contains a 33-  
261 bp deletion removing the G-box, while *g*<sup>#2</sup> and *g*<sup>#3</sup> carry a thymidine insertion and a 2-bp deletion  
262 within the G-box, respectively (Figure 11A). The 2-bp deletion in line *g*<sup>#3</sup> creates an alternative  
263 G-box (5'-CACGTT-3'). The transcript level of *C5-SD2* was significantly reduced in both mock-

264 and JA-treated *g* lines compared with control lines, with the exception of mock-treated *g*<sup>#3</sup> hairy  
265 roots (Figure 11B). However, the JA-induced upregulation of *C5-SD2* in all three *g* lines was  
266 comparable to that in control hairy roots (Supplemental Figure 10), suggesting that the observed  
267 decrease in *C5-SD2* transcript levels in JA-treated conditions is merely due to the reduced basal  
268 *C5-SD2* expression. Next, we cloned *C5-SD2* promoter fragments from the *g* lines and fused  
269 them to the *fLUC* gene to create reporter constructs corresponding to the genome edited *C5-SD2*  
270 promoters. Transient expression assays in tobacco protoplasts showed that MYC2 and GAME9  
271 were unable to transactivate these genome edited *C5-SD2* promoter fragments in which the G-  
272 box was either removed or disrupted (Figure 11C).

273 The expression levels of other cholesterol and most SGA biosynthesis genes were not  
274 altered in mock-treated *g* lines (Figure 11B), indicating that the effect on *C5-SD2* expression was  
275 specific and had no general feedback effects on other cholesterol and SGA pathway genes.  
276 Nonetheless, we observed a small but significant decrease in dehydrotomatine levels compared  
277 with control lines (Figure 11D), indicating that targeting of specific and essential *cis*-regulatory  
278 elements in promoters of key pathway genes is sufficient to alter metabolic fluxes in pathways  
279 and, thereby, modulate metabolite levels. For comparison, we measured the  $\alpha$ -tomatine and  
280 dehydrotomatine content in two independent *c5-sd2* loss-of-function hairy root lines (cultivar  
281 Moneymaker) obtained by CRISPR-Cas9 genome editing (Supplemental Figure 11A). The levels  
282 of the main SGAs were reduced by approximately 50% in both mock- and JA-treated conditions  
283 compared with control lines (Supplemental Figure 11B). These results support our hypothesis  
284 that MYC1 and MYC2 help ensure constitutive *C5-SD2* expression by binding a G-box in the  
285 *C5-SD2* promoter.

## 286 **DISCUSSION**

287 Throughout the plant kingdom, transcriptional regulators belonging to the clade IIIe bHLH TFs  
288 are master regulators of the JA-induced production of specialized metabolites that help plants fend  
289 off biotic enemies (De Geyter et al., 2012; Goossens et al., 2017). Here, we show that two tomato  
290 clade IIIe bHLH TFs, MYC1 and MYC2, control the constitutive production of SGAs that grant  
291 protection against a wide variety of herbivores and pathogens by making up a chemical defense  
292 barrier (Friedman, 2002). Accordingly, CRISPR-Cas9-mediated disruption or deletion of an  
293 endogenous G-box, which is targeted by MYC1/2, in the promoter of *C5-SD2* leads to decreased

294 basal *C5-SD2* expression. Although the activation of specialized metabolism by MYC TFs is  
295 typically initiated by the perception of JA-Ile, constitutive SGA biosynthesis seems to only  
296 partially rely upon COI1-dependent signaling.

### 297 **JA-Regulated TFs Control Constitutive Alkaloid Production in Solanaceous Species**

298 SGAs provide multiple members of the *Solanum* genus constitutive protection against a broad  
299 range of herbivores and pathogens (Friedman, 2002). Here, we report that the tomato JA-  
300 regulated TFs MYC1 and MYC2 coordinate the basal biosynthesis of these cholesterol-derived  
301 products. A double *myc1 myc2* hairy root knockout line displayed suppressed expression of genes  
302 known to be involved in the biosynthesis of SGAs and their precursors. In addition, the  
303 expression of several SGA pathway genes in *myc1 myc2* root lines was not induced anymore by  
304 JA treatment. Although *myc1 myc2* hairy roots no longer exhibited JA-induced upregulation of  
305 *ODC*, which encodes an enzyme in the highly JA-inducible polyamine pathway (Chen et al.,  
306 2006), the basal expression of *ODC* was unaffected. Accordingly, targeted metabolite profiling  
307 showed that *myc1 myc2* hairy roots contained severely reduced constitutive levels of the main  
308 tomato SGAs  $\alpha$ -tomatine and dehydrotomatine but not of the phenylpropanoid-polyamine  
309 conjugates tris(dihydrocaffeoyl)spermine and *N*-caffeoylputrescine. The levels of the latter  
310 compounds in *myc1 myc2* root lines were only affected in JA-treated conditions. Basal  
311 transcription of some, but not all, cholesterol and SGA biosynthesis genes was reduced in single  
312 *myc1* and *myc2* knockout lines, however, their JA inducibility was retained. Moreover, only a  
313 modest decrease in  $\alpha$ -tomatine and dehydrotomatine content was observed in *myc2* hairy root  
314 lines alone. This indicates that there is functional redundancy between MYC1 and MYC2 in the  
315 control of SGA accumulation. Likewise, both constitutive and insect-inducible glucosinolate  
316 production in Arabidopsis is redundantly controlled by the clade IIIe bHLH TFs MYC2, MYC3,  
317 and MYC4 (Schweizer et al., 2013).

318 Both MYC1 and MYC2 directly regulate the expression of *C5-SD2*, a cholesterologenesis  
319 gene, and likely of other cholesterol and SGA biosynthesis genes as well, in synergy with  
320 GAME9 by binding G-box and GC-rich elements in their promoters. Disruption or deletion of a  
321 G-box in the endogenous promoter of *C5-SD2* by genome editing leads to reduced *C5-SD2*  
322 transcription in both mock- and JA-treated conditions, which suggests that the synergistic action  
323 of these transcriptional regulators contributes to the basal expression of *C5-SD2*. Like our *myc1*

324 *myc2* hairy root knockout line, tomato plant lines in which *GAME9* is either silenced or mutated  
325 display suppressed basal transcript levels of cholesterol and SGA biosynthesis genes (Cárdenas et  
326 al., 2016; Nakayasu et al., 2018). Consequently, these lines accumulate less SGAs (Cárdenas et  
327 al., 2016; Nakayasu et al., 2018), suggesting that *GAME9*, another JA-regulated TF, regulates the  
328 basal expression of genes needed for the constitutive production of SGAs. Interestingly, tobacco  
329 *MYC1* and *MYC2* orthologs control the production of nicotine, another constitutively highly  
330 accumulating alkaloid, together with *ERF189*, a tobacco JA-regulated AP2-ERF family member  
331 related to *GAME9* (Shoji and Hashimoto, 2011). Target gene promoters harbor G-box and GC-  
332 rich elements that allow binding of these clade IIIe bHLH TFs and *ERF189*, respectively (Shoji  
333 and Hashimoto, 2011; Kajikawa et al., 2017; Xu et al., 2017). Silencing of *MYC1* or *MYC2*  
334 orthologs in tobacco leads to suppressed constitutive transcription of genes involved in nicotine  
335 biosynthesis and severely reduced basal alkaloid levels (Shoji and Hashimoto, 2011).  
336 Furthermore, like *GAME9*, *ERF189* controls alkaloid accumulation in unelicited conditions since  
337 *nic1 nic2* hairy roots, in which the most severely repressed AP2/ERF is *ERF189*, display  
338 decreased basal expression of nicotine biosynthesis and transport genes as well as declined  
339 constitutive alkaloid production (Shoji et al., 2010). This suggests that the role of clade IIIe  
340 bHLH TFs in the regulation of constitutive biosynthesis of bioactive specialized metabolites may  
341 occur within additional *Solanaceae* species and might even be widespread within the plant  
342 kingdom.

343 An important question that remains is how these JA-regulated TFs are able to drive  
344 constitutive biosynthesis of highly accumulating alkaloids in *Solanaceae* members. The  
345 proximity of G-box and GC-rich elements in their target promoters and the collaborative action  
346 of these clade IIIe bHLH and AP2/ERF TFs suggest their cooperative binding, which can be a  
347 way to enhance their specificity and binding affinity for *cis*-regulatory elements (CREs)  
348 (Brkljacic and Grotewold, 2017). Target specificity of Arabidopsis *MYC2/MYC3/MYC4* has  
349 been proposed to be governed by their interaction with R2R3-MYB TFs (Schweizer et al., 2013).  
350 Furthermore, competitive binding between these MYBs and the JAZ repressors to the JAZ  
351 interaction domain of *MYC2/3/4* has already been forwarded as a mechanism for the regulation  
352 of constitutive glucosinolate production in Arabidopsis (Schweizer et al., 2013). Thus, it is  
353 possible that tomato *MYC1/2* and *GAME9*, as well as their tobacco counterparts, form protein  
354 complexes that may facilitate the shielding of clade IIIe bHLH TFs from JAZ repressors.

## 355 **Partial Dependence of Constitutive SGA Biosynthesis on JA Signaling**

356 JA signaling provokes transcriptional reprogramming, leading toward the biosynthesis of species-  
357 specific defense compounds across the plant kingdom. Although perception of JA-Ile typically  
358 promotes fast and strong upregulation of specialized metabolism, in our hands tomato hairy roots  
359 that were treated with JA for one day did not display a marked increase in SGA levels whereas  
360 they did in the levels of phenylpropanoid-polyamine conjugates. Only after three to four days of  
361 continuous JA treatment, we and others were able to observe a modest increase in SGA content  
362 of 1.6- to 1.8-fold (Supplemental Figure 12) (Nakayasu et al., 2018), suggesting that this may not  
363 be a primary effect of JA signaling. The same holds true for the limited JA-induced upregulation  
364 of nicotine biosynthesis in tobacco plants and hairy roots (Shoji et al., 2008). In both tomato and  
365 tobacco, COI1-mediated perception of JA-Ile has been suggested to be essential for the minimal  
366 increase in alkaloid production upon JA elicitation (Shoji et al., 2008; Abdelkareem et al., 2017).  
367 Here, we report that constitutive SGA biosynthesis declines in mock-treated tomato *coil* loss-of-  
368 function mutants, which confirms previous observations (Abdelkareem et al., 2017). This might  
369 be due to the stabilization and accumulation of JAZ proteins that block the activity of MYC1/2.  
370 The decrease in constitutive SGA content in *coil* lines, however, is not as severe as in the double  
371 *myc1 myc2* knockout line. Hence, this suggests that the regulation of basal SGA production only  
372 partially relies upon COI1-dependent JA signaling and that MYC1 and MYC2, likely together  
373 with GAME9, are able to regulate SGA biosynthesis independent of JA signaling as well. The  
374 reduction, but not absence, of SGAs in *spr2* tomato plants, in which JA biosynthesis is impaired,  
375 further supports this notion (Montero-Vargas et al., 2018).

376 Transcriptional coordination of genes involved in the same specialized metabolic pathway  
377 can be accomplished by their promoters acquiring CREs that can be bound by JA-regulated TFs  
378 (Mertens et al., 2016; Shoji, 2019). It is therefore plausible to assume that, through the  
379 recruitment of G-box and GCC-box elements to the promoters of alkaloid biosynthesis genes, the  
380 JA-regulated MYC1/2 and GAME9, and their orthologs in tobacco, evolved to accommodate the  
381 constitutive chemical defense barrier made up of alkaloids.

## 382 **METHODS**

### 383 **DNA Constructs**

384 *Transient Expression Assay Constructs*

385 For transient expression assays, the coding sequence of tomato *MYC1* was PCR-amplified with  
386 the primers listed in Supplemental Table 1 and recombined in a Gateway donor vector  
387 (Invitrogen). Subsequently, a Gateway LR reaction (Invitrogen) was performed with the p2GW7  
388 vector (Vanden Bossche et al., 2013). The *C5-SD2* promoter regions in which a G-box was  
389 disrupted or removed were PCR-amplified from *g* hairy root lines (cultivar Moneymaker) and  
390 recombined in a Gateway donor vector (Invitrogen). Next, Gateway LR reactions (Invitrogen)  
391 were performed with the pGWL7 vector (Vanden Bossche et al., 2013). All other constructs used  
392 for transient expression assays were generated previously (Cárdenas et al., 2016).

393 *CRISPR-Cas9 Constructs*

394 To select CRISPR-Cas9 guide (g)RNA target sites, CRISPOR (<http://crispor.tefor.net/>)  
395 (Haeussler et al., 2016) was used, with as PAM requirement 5'-NGA-3' for targeting the G-box  
396 in the *C5-SD2* promoter and 5'-NGG-3' for single and double knockouts. CRISPR-Cas9  
397 constructs were cloned as previously described (Fauser et al., 2014; Ritter et al., 2017; Pauwels et  
398 al., 2018). Briefly, for each gRNA target site, two complementary oligonucleotides with 4-bp  
399 overhangs (Supplemental Table 1) were annealed and inserted by a Golden Gate reaction with  
400 *BpiI* (Thermo Scientific) and T4 DNA ligase (Thermo Scientific) in following Gateway entry  
401 vectors: pEN-C1.1 (Fauser et al., 2014) was used for targeting the G-box in the *C5-SD2* promoter  
402 by a single gRNA approach, pMR217 (L1–R5) and pMR218 (L5–L2) (Ritter et al., 2017) were  
403 used for single *myc1*, *myc2*, *coi1*, and *c5-sd2* knockouts by a dual gRNA approach, and pMR217  
404 (L1–R5) (Ritter et al., 2017), pMR219 (L5–L4), pMR204 (R4–R3), and pMR205 (L5–L2) were  
405 used for the double *myc1 myc2* knockout. To allow combining four gRNA modules, primers  
406 (Supplemental Table 1) were designed to amplify the gRNA module from pEn-C1.1 (L1–L2)  
407 (Fauser et al., 2014) adding appropriate attB/attBr flanking sites (L5–L4, B4r–B3r, and L3–L2) to  
408 each fragment. The amplified fragments were then cloned into the corresponding pDONR221  
409 vector (pDONR221 P5–P4, P4r–P3r, and P3–P2) by Gateway BP reactions (Invitrogen) to  
410 generate entry clones suitable for MultiSite Gateway LR cloning. An additional *BbsI* site in the  
411 pDONR backbone was eliminated by site-directed mutagenesis using primers noBbsI\_F and  
412 noBbsI\_R (Supplemental Table 1) followed by an In-Fusion reaction (Takara Bio USA). In order  
413 to yield the final binary vectors, (MultiSite) Gateway LR reactions (Invitrogen) were used. One

414 gRNA module was recombined with pDe-Cas9(VQR)-Km (Kleinstiver et al., 2015; Swinnen et  
415 al., 2020) to target the G-box in the *C5-SD2* promoter. Two and four gRNA modules were  
416 recombined with pDe-Cas9-Km (Ritter et al., 2017) for single *myc1*, *myc2*, *coi1*, and *c5-sd2*  
417 knockouts and a double *myc1 myc2* knockout, respectively.

#### 418 **Transient Expression Assays in Tobacco Protoplasts**

419 Transient expression assays in protoplasts prepared from *N. tabacum* Bright Yellow-2 (BY-2)  
420 cells were performed as previously described (Vanden Bossche et al., 2013). Briefly, protoplasts  
421 were transfected with a *pC5-SD2::fLUC* reporter construct and effector constructs overexpressing  
422 *GUS*, *MYC1*, *MYC2*, *GAME9* or a combination thereof. A *pCaMV35S::rLUC* construct was co-  
423 transfected for normalization of fLUC activity. Two micrograms of each construct were  
424 transfected and total DNA added was equalized with a *pCaMV35S::GUS* control construct. After  
425 overnight incubation followed by lysis of the cells, the luciferase activities were measured using  
426 the Dual-Luciferase Reporter Assay System (Promega). Each assay was carried out in eight  
427 biological repeats. Statistical significance was determined by unpaired Student's *t*-tests.

#### 428 **Generation and Cultivation of Tomato Hairy Roots**

429 *S. lycopersicum* (cultivar Moneymaker) seed sterilization, rhizogenic *Agrobacterium*-mediated  
430 transformation of tomato seedlings and cultivation of hairy roots were carried out as previously  
431 described (Harvey et al., 2008; Ron et al., 2014) with following modifications. Tomato seeds  
432 were surface-sterilized in 70% (v/v) ethanol for 5 min followed by 3% (v/v) NaOCl for 20 min  
433 and three washes with sterile water. Seeds were plated on Murashige and Skoog (MS) medium  
434 (pH 5.8) containing 4.3 g/L of MS (Duchefa), 0.5 g/L of MES, 10 g/L of sucrose, and 10 g/L of  
435 agar (Neogen) in Magenta boxes. Boxes were put in the dark at 4°C for two days, in the dark at  
436 24°C for one day, and in a 24°C controlled photoperiodic growth chamber (16:8 photoperiods)  
437 for ca. two weeks until cotyledons were fully expanded and the true leaves were just emerged.  
438 Competent rhizogenic *Agrobacterium* (strain ATCC15834) cells were transformed by  
439 electroporation with the desired binary vector, plated on yeast extract broth (YEB) medium with  
440 100 mg/L of spectinomycin, and incubated at 28°C for four days. Each transformed culture was  
441 inoculated from plate into liquid YEB medium with 100 mg/L of spectinomycin and incubated  
442 overnight at 28°C with shaking at 200 rpm. Each transformed culture was used to transform



443 approximately 40 cotyledon explants. Using a scalpel, cotyledons were cut in half after cutting  
444 off their base and top, which was followed by immersion of the explants in *Agrobacterium*  
445 culture with an optical density of 0.2–0.3 at 600 nm in liquid MS medium for 20 min. Next, the  
446 explants were blotted on sterile Whatman filter paper and transferred with their adaxial side down  
447 to plates with MS medium (pH 5.8) containing 4.4 g/L of MS supplemented with vitamins  
448 (Duchefa), 0.5 g/L of MES, 30 g/L of sucrose, and 8 g/L of agar (Neogen) without antibiotics.  
449 After three to four days of incubation in the dark at 25°C (Oberpichler et al., 2008), the explants  
450 were transferred with their adaxial side down to plates with MS medium (pH 5.8) containing 4.4  
451 g/L of MS supplemented with vitamins (Duchefa), 0.5 g/L of MES, 30 g/L of sucrose, and 8 g/L  
452 of agar (Neogen) with 200 mg/L of cefotaxime and 50 mg/L of kanamycin. These plates were  
453 returned to the dark at 25°C until hairy roots emerged from infected sites. Hairy roots were  
454 excised and cultured on fresh plates with MS medium (pH 5.8) containing 4.4 g/L of MS  
455 supplemented with vitamins (Duchefa), 0.5 g/L of MES, 30 g/L of sucrose, and 10 g/L of agar  
456 (Neogen) with 200 mg/L of cefotaxime and 50 mg/L of kanamycin. After three rounds of  
457 subculture on plates with MS medium of the same composition, hairy roots were subcultured  
458 every four weeks on plates with MS medium without antibiotics for maintenance.

#### 459 **Identification of CRISPR-Cas9 Hairy Root Mutants**

460 CRISPR-Cas9 mutants were identified as described previously (Swinnen et al., 2020). Genomic  
461 DNA was prepared from homogenized hairy root cultures using extraction buffer (pH 9.5)  
462 containing 0.1 M of tris(hydroxymethyl)aminomethane (Tris)-HCl, 0.25 M of KCl, and 0.01 M  
463 of ethylenediaminetetraacetic acid (EDTA). This mixture was incubated at 95°C for 10 min and  
464 subsequently cooled at 4°C for 5 min. After addition of 3% (w/v) BSA, collected supernatant was  
465 used as a template in a standard PCR reaction using GoTaq (Promega) with Cas9-specific  
466 primers or primers to amplify the gRNA(s) target region(s) (Supplemental Table 1). PCR  
467 amplicons containing the gRNA(s) target site(s) were purified using HighPrep PCR reagent  
468 (MAGBIO). After Sanger sequencing of the purified PCR amplicons with an amplification  
469 primer located approximately 200 bp from the Cas9 cleavage site, quantitative sequence trace  
470 data were decomposed using Inference of CRISPR Editing (ICE) CRISPR Analysis Tool  
471 (<https://ice.synthego.com/#/>).

#### 472 **Gene Expression Analysis by Quantitative Real-Time PCR**

473 Hairy roots were grown for eight days in liquid MS medium (pH 5.8) containing 4.4 g/L of MS  
474 supplemented with vitamins (Duchefa), 0.5 g/L of MES, and 30 g/L of sucrose. Three biological  
475 replicates per line were treated for 24 h with 50  $\mu$ M of JA or an equal amount of ethanol by  
476 replacement of the medium. Hairy roots were rinsed with purified water, harvested by flash  
477 freezing in liquid nitrogen, and ground using the Mixer Mill 300 (Retch).

478 Messenger RNA was extracted from approximately 15 mg of homogenized tissue as  
479 reported previously (Townsend et al., 2015) with following modifications. Tissue was lysed using  
480 500  $\mu$ L of lysate binding buffer (LBB) containing 100 mM of Tris-HCl (pH 7.5), 500 mM of  
481 LiCl, 10 mM of EDTA (pH 8.0), 1% of sodium dodecyl sulfate (SDS), 5 mM of dithiothreitol  
482 (DTT), 15  $\mu$ L/mL of Antifoam A, and 5  $\mu$ L/mL of 2-mercaptoethanol, and the mixture was  
483 allowed to stand for 10 min. Messenger RNA was separated from 200  $\mu$ L of lysate using 1  $\mu$ L of  
484 12.5  $\mu$ M of 5' biotinylated polyT oligonucleotide (5'-biotin-  
485 ACAGGACATTCGTCGCTTCCTTTTTTTTTTTTTTTTTTTT-3') and the mixture was allowed  
486 to stand for 10 min. Next, captured messenger RNA was isolated from the lysate by adding 20  $\mu$ L  
487 of LBB-washed streptavidin-coated magnetic beads (New England Biolabs) and was allowed to  
488 stand for 10 min. Samples were placed on a MagWell Magnetic Separator 96 (EdgeBio) and  
489 washed with 200  $\mu$ L of washing buffer A (10 mM of Tris-HCl (pH 7.5), 150 mM of LiCl, 1 mM  
490 of EDTA (pH 8.0), 0.1% of SDS), washing buffer B (10 mM of Tris-HCl (pH 7.5), 150 mM of  
491 LiCl, 1 mM of EDTA (pH 8.0)), and low-salt buffer (20 mM of Tris-HCl (pH 7.5), 150 mM of  
492 NaCl, 1 mM of EDTA (pH 8.0)), which were pre-chilled on ice. Elution of messenger RNA was  
493 done by adding 20  $\mu$ L of 10 mM of Tris-HCl (pH 8.0) with 1 mM of 2-mercaptoethanol followed  
494 by incubation of the mixture at 80°C for 2 min.

495 First-strand complementary DNA was synthesized from 20  $\mu$ L of messenger RNA eluate  
496 by qScript cDNA Synthesis Kit (Quantabio). For control samples, cDNA of three biological  
497 replicates was pooled per independent line and treatment. Quantitative real-time PCR (qPCR)  
498 reactions were carried out with a LightCycler 480 System (Roche) using Fast SYBR Green  
499 Master Mix (Applied Biosystems) and primers (Supplemental Table 1) designed by QuantPrime  
500 (<https://www.quantprime.de/>) (Arvidsson et al., 2008). Gene expression levels were quantified  
501 relative to *CLATHRIN ADAPTOR COMPLEXES MEDIUM SUBUNIT (CAC)* and *TAP42-*  
502 *INTERACTING PROTEIN (TIP41)* using the  $2^{-\Delta\Delta C_t}$  method (Livak and Schmittgen, 2001).

503 Statistical significance of log<sub>2</sub>-transformed data was determined by ANOVA followed by Tukey  
504 post-hoc analysis ( $P < 0.05$ ).

### 505 **Targeted Metabolite Profiling by Liquid Chromatography-Mass Spectrometry**

506 Hairy roots were grown for four weeks in liquid MS medium (pH 5.8) containing 4.4 g/L of MS  
507 supplemented with vitamins (Duchefa), 0.5 g/L of MES, and 30 g/L of sucrose. Five biological  
508 replicates per line were treated for 24 h or 96 h with 50  $\mu$ M of JA or an equal amount of ethanol  
509 by replacement of the medium. Hairy roots were rinsed with purified water, harvested by flash  
510 freezing in liquid nitrogen, and ground with pestle and mortar. Approximately 400 mg of  
511 homogenized tissue was extracted using 1 mL of MeOH at room temperature for 10 min. Next,  
512 supernatant was evaporated to dryness under vacuum, the residue was dissolved in 800  $\mu$ L of  
513 H<sub>2</sub>O/cyclohexane (1:1, v/v), and 100  $\mu$ L of the aqueous phase was filtered using a 0.2  $\mu$ m filter  
514 plate (Pall) and retained for analysis.

515 For LC-MS, 10  $\mu$ L of the sample was injected into an Acquity UPLC BEH C18 column  
516 (2.1 x 150 mm, 1.7  $\mu$ m) mounted on a Waters Acquity UPLC system coupled to a SYNAPT  
517 HDMS Q-TOF via an electrospray ionization source operated negative mode. The following  
518 gradient was run using acidified (0.1% (v/v) formic acid) solvents A (water/acetonitrile, 99:1,  
519 v/v) and B (acetonitrile/water; 99:1, v/v) at a flow rate of 350  $\mu$ L/min: time 0 min, 5% B; 30 min,  
520 50% B; 33 min, 100% B. Negative mode MS and chromatogram integration and alignment using  
521 the Progenesis QI software package (Waters) were carried out as described (Vanholme et al.,  
522 2013). Statistical significance was determined by ANOVA followed by Tukey post-hoc analysis  
523 ( $P < 0.05$ ) or by unpaired Student's *t*-tests.

### 524 **Phylogenetic Analysis**

525 Amino acid sequences from *A. thaliana* MYC2 orthologs were retrieved from the comparative  
526 genomics resource PLAZA 4.0 Dicots (<http://bioinformatics.psb.ugent.be/plaza/>) (Van Bel et al.,  
527 2018), with the exception of *N. tabacum* sequences that were retrieved through a BLASTP search  
528 in the National Center for Biotechnology Information (NCBI) GenBank protein database. All  
529 phylogenetic analyses were conducted in MEGA7 (Kumar et al., 2016). A multiple sequence  
530 alignment of the full-length proteins was generated with MUSCLE and can be found in  
531 Supplemental Figure 13. Using the Find Best DNA/Protein Models (ML) tool, the Maximum

532 Likelihood method based on the Le\_Gascuel\_2008 model (Le and Gascuel, 2008) was chosen to  
533 infer the phylogenetic tree. Evolutionary rate differences among sites were modeled using a  
534 discrete Gamma distribution. All positions with less than 95% site coverage were eliminated.  
535 Bootstrap analysis was carried out with 1,000 replicates.

### 536 Accession Numbers

537 Sequence data from this article can be found in the EMBL/GenBank/Solgenomics data libraries  
538 under the following accession numbers: *MYC2* (Solyc08g076930), *MYC1* (Solyc08g005050),  
539 *CAS* (Solyc04g070980), *3bHSD2* (Solyc02g081730), *CPI* (Solyc12g098640), *CYP51*  
540 (Solyc01g008110), *C14-R* (Solyc09g009040), *8,7-SI* (Solyc06g082980), *SSR2*  
541 (Solyc02g069490), *SMO3* (Solyc01g091320), *SMO4* (Solyc06g005750), *C5-SD2*  
542 (Solyc02g086180), *7-DR2* (Solyc06g074090), *GAME11* (Solyc07g043420), *GAME6*  
543 (Solyc07g043460), *GAME4* (Solyc12g006460), *GAME12* (Solyc12g006470), *GAME25*  
544 (Solyc01g073640), *GAME1* (Solyc07g043490), *GAME17* (Solyc07g043480), *GAME18*  
545 (Solyc07g043500), *GAME9* (Solyc01g090340), *CAC* (Solyc08g006960), *TIP41*  
546 (Solyc10g049850), *JAZ1* (Solyc12g009220), *ODC* (Solyc04g082030), and *COII*  
547 (Solyc05g052620).

### 548 Supplemental Data

549 **Supplemental Figure 1.** Schematic representation of *MYC2* with location of the CRISPR-Cas9  
550 cleavage sites and *myc2* mutant sequences.

551 **Supplemental Figure 2.** Unaffected JA inducibility of SGA biosynthesis gene expression in  
552 *myc2* lines.

553 **Supplemental Figure 3.** Schematic representation of *MYC1* with location of the CRISPR-Cas9  
554 cleavage sites and *myc1* mutant sequences.

555 **Supplemental Figure 4.** Unaffected JA inducibility of SGA biosynthesis gene expression in  
556 *myc1* lines.

557 **Supplemental Figure 5.** *myc2* and *myc1* lines do not exhibit upregulated expression of *MYC1*  
558 and *MYC2*, respectively.

559 **Supplemental Figure 6.** Schematic representation of *MYC1* and *MYC2* with location of the  
560 CRISPR-Cas9 cleavage sites and *myc1 myc2* mutant sequences.

561 **Supplemental Figure 7.** Reduced or absent JA inducibility of SGA biosynthesis gene expression  
562 in a *myc1 myc2* line.

563 **Supplemental Figure 8.** Schematic representation of *CO11* with location of the CRISPR-Cas9  
564 cleavage sites and *coil* mutant sequences.

565 **Supplemental Figure 9.** SGA biosynthesis gene expression is no longer JA inducible in *coil*  
566 lines.

567 **Supplemental Figure 10.** JA inducibility of *C5-SD2* expression is not affected in G-box (*g*)  
568 mutant lines.

569 **Supplemental Figure 11.** Reduced SGA levels in *c5-sd2* lines.

570 **Supplemental Figure 12.** Limited SGA induction upon 96h of JA treatment.

571 **Supplemental Figure 13.** Protein alignment generated by MUSCLE used for the phylogenetic  
572 tree in Figure 3A.

573 **Supplemental Table 1.** Oligonucleotides used in this study

#### 574 **ACKNOWLEDGMENTS**

575 This work was supported by the Research Foundation Flanders (FWO) through the projects  
576 G005312N and G004515N, a predoctoral fellowship to E.C., postdoctoral fellowships to J.P.,  
577 P.F.C., and L.P., and by the European Community's Horizon2020 Program under grant  
578 agreement [760331-Newcotiana]. We thank Geert Goeminne (VIB Metabolomics Core) for  
579 processing of the LC-MS chromatograms and Annick Bleys for help with preparing the  
580 manuscript. In addition, we thank Siobhan Brady and Kaisa Kajala for training G.S. in the use of  
581 CRISPR-Cas9 genome editing and in the generation of tomato hairy roots while hosting her in  
582 Siobhan Brady's lab.

#### 583 **AUTHOR CONTRIBUTIONS**

584 G.S., L.P., and A.G. designed the experiments. G.S., M.D.M., J.P., F.J.M.H., E.C., R.D.C.,  
585 R.V.B., P.F.C., and M.R. performed experiments. G.S., J.P., L.P., and A.G. analyzed the data.  
586 G.S. wrote the article and J.P., L.P., and A.G. complemented the writing. A.G. agrees to serve as  
587 the author responsible for contact and ensures communication. All scientists who have  
588 contributed substantially to the conception, design or execution of the work described in the  
589 manuscript are included as authors, in accordance with the guidelines from the Committee on  
590 Publication Ethics (COPE) (<http://publicationethics.org/resources/guidelines>). All authors agree  
591 to the list of authors and the identified contributions.

## 592 REFERENCES

- 593 **Abdelkareem, A., Thagun, C., Nakayasu, M., Mizutani, M., Hashimoto, T., and Shoji, T.** (2017).  
594 Jasmonate-induced biosynthesis of steroidal glycoalkaloids depends on COI1 proteins in tomato.  
595 *Biochem. Biophys. Res. Commun.* **489**: 206-210.
- 596 **Acosta, C., Pérez-Amador, M.A., Carbonell, J., and Granell, A.** (2005). The two ways to produce  
597 putrescine in tomato are cell-specific during normal development. *Plant Sci.* **168**: 1053-1057.
- 598 **Arvidsson, S., Kwasniewski, M., Riaño-Pachón, D.M., and Mueller-Roeber, B.** (2008). QuantPrime -  
599 a flexible tool for reliable high-throughput primer design for quantitative PCR. *BMC*  
600 *Bioinformatics* **9**: 465.
- 601 **Boter, M., Ruíz-Rivero, O., Abdeen, A., and Prat, S.** (2004). Conserved MYC transcription factors play  
602 a key role in jasmonate signaling both in tomato and *Arabidopsis*. *Genes Dev.* **18**: 1577-1591.
- 603 **Brkljacic, J., and Grotewold, E.** (2017). Combinatorial control of plant gene expression. *Biochim.*  
604 *Biophys. Acta - Gene Regul. Mech.* **1860**: 31-40.
- 605 **Cárdenas, P.D., et al.** (2016). GAME9 regulates the biosynthesis of steroidal alkaloids and upstream  
606 isoprenoids in the plant mevalonate pathway. *Nat. Commun.* **7**: 10654.
- 607 **Cárdenas, P.D., et al.** (2019). Pathways to defense metabolites and evading fruit bitterness in genus  
608 *Solanum* evolved through 2-oxoglutarate-dependent dioxygenases. *Nat. Commun.* **10**: 5169.
- 609 **Chen, H., Jones, A.D., and Howe, G.A.** (2006). Constitutive activation of the jasmonate signaling  
610 pathway enhances the production of secondary metabolites in tomato. *FEBS Lett.* **580**: 2540-  
611 2546.
- 612 **Chini, A., Gimenez-Ibanez, S., Goossens, A., and Solano, R.** (2016). Redundancy and specificity in  
613 jasmonate signalling. *Curr. Opin. Plant Biol.* **33**: 147-156.
- 614 **Chini, A., Ben-Romdhane, W., Hassairi, A., and Aboul-Soud, M.A.M.** (2017). Identification of  
615 TIFY/JAZ family genes in *Solanum lycopersicum* and their regulation in response to abiotic  
616 stresses. *PLoS ONE* **12**: e0177381.
- 617 **Chini, A., Fonseca, S., Fernández, G., Adie, B., Chico, J.M., Lorenzo, O., García-Casado, G., López-  
618 Vidriero, I., Lozano, F.M., Ponce, M.R., Micol, J.L., and Solano, R.** (2007). The JAZ family of  
619 repressors is the missing link in jasmonate signalling. *Nature* **448**: 666-671.
- 620 **De Geyter, N., Gholami, A., Goormachtig, S., and Goossens, A.** (2012). Transcriptional machineries in  
621 jasmonate-elicited plant secondary metabolism. *Trends Plant Sci.* **17**: 349-359.
- 622 **Du, M., et al.** (2017). MYC2 orchestrates a hierarchical transcriptional cascade that regulates jasmonate-  
623 mediated plant immunity in tomato. *Plant Cell* **29**: 1883-1906.
- 624 **Fausser, F., Schiml, S., and Puchta, H.** (2014). Both CRISPR/Cas-based nucleases and nickases can be  
625 used efficiently for genome engineering in *Arabidopsis thaliana*. *Plant J.* **79**: 348-359.

- 626 **Fonseca, S., Chini, A., Hamberg, M., Adie, B., Porzel, A., Kramell, R., Miersch, O., Wasternack, C.,**  
627 **and Solano, R.** (2009). (+)-7-*iso*-Jasmonoyl-L-isoleucine is the endogenous bioactive jasmonate.  
628 *Nat. Chem. Biol.* **5**: 344-350.
- 629 **Friedman, M.** (2002). Tomato glycoalkaloids: role in the plant and in the diet. *J. Agric. Food Chem.* **50**:  
630 5751-5780.
- 631 **Friedman, M., and Levin, C.E.** (1998). Dehydrotomatine content in tomatoes. *J. Agric. Food Chem.* **46**:  
632 4571-4576.
- 633 **Goossens, J., Mertens, J., and Goossens, A.** (2017). Role and functioning of bHLH transcription factors  
634 in jasmonate signalling. *J. Exp. Bot.* **68**: 1333-1347.
- 635 **Haeussler, M., Schönig, K., Eckert, H., Eschstruth, A., Mianné, J., Renaud, J.-B., Schneider-**  
636 **Maunoury, S., Shkumatava, A., Teboul, L., Kent, J., Joly, J.-S., and Concordet, J.-P.** (2016).  
637 Evaluation of off-target and on-target scoring algorithms and integration into the guide RNA  
638 selection tool CRISPOR. *Genome Biol.* **17**: 148.
- 639 **Harvey, J.J.W., Lincoln, J.E., and Gilchrist, D.G.** (2008). Programmed cell death suppression in  
640 transformed plant tissue by tomato cDNAs identified from an *Agrobacterium rhizogenes*-based  
641 functional screen. *Mol. Genet. Genomics* **279**: 509-521.
- 642 **Itkin, M., et al.** (2011). GLYCOALKALOID METABOLISM1 is required for steroidal alkaloid  
643 glycosylation and prevention of phytotoxicity in tomato. *Plant Cell* **23**: 4507-4525.
- 644 **Itkin, M., et al.** (2013). Biosynthesis of antinutritional alkaloids in solanaceous crops is mediated by  
645 clustered genes. *Science* **341**: 175-179.
- 646 **Kajikawa, M., Sierro, N., Kawaguchi, H., Bakaheer, N., Ivanov, N.V., Hashimoto, T., and Shoji, T.**  
647 (2017). Genomic insights into the evolution of the nicotine biosynthesis pathway in tobacco. *Plant*  
648 *Physiol.* **174**: 999-1011.
- 649 **Kazan, K., and Manners, J.M.** (2013). MYC2: the master in action. *Mol. Plant* **6**: 686-703.
- 650 **Kleinstiver, B.P., Prew, M.S., Tsai, S.Q., Topkar, V.V., Nguyen, N.T., Zheng, Z., Gonzales, A.P.W.,**  
651 **Li, Z., Peterson, R.T., Yeh, J.-R.J., Aryee, M.J., and Joung, J.K.** (2015). Engineered CRISPR-  
652 Cas9 nucleases with altered PAM specificities. *Nature* **523**: 481-485.
- 653 **Kozukue, N., Han, J.-S., Lee, K.-R., and Friedman, M.** (2004). Dehydrotomatine and  $\alpha$ -tomatine  
654 content in tomato fruits and vegetative plant tissues. *J. Agric. Food Chem.* **52**: 2079-2083.
- 655 **Kumar, S., Stecher, G., and Tamura, K.** (2016). MEGA7: Molecular Evolutionary Genetics Analysis  
656 version 7.0 for bigger datasets. *Mol. Biol. Evol.* **33**: 1870-1874.
- 657 **Le, S.Q., and Gascuel, O.** (2008). An improved general amino acid replacement matrix. *Mol. Biol. Evol.*  
658 **25**: 1307-1320.
- 659 **Livak, K.J., and Schmittgen, T.D.** (2001). Analysis of relative gene expression data using real-time  
660 quantitative PCR and the  $2^{-\Delta\Delta CT}$  method. *Methods* **25**: 402-408.
- 661 **Ma, Z., Zhu, P., Shi, H., Guo, L., Zhang, Q., Chen, Y., Chen, S., Zhang, Z., Peng, J., and Chen, J.**  
662 (2019). PTC-bearing mRNA elicits a genetic compensation response via Upf3a and COMPASS  
663 components. *Nature* **568**: 259-263.
- 664 **Mertens, J., Van Moerkercke, A., Vanden Bossche, R., Pollier, J., and Goossens, A.** (2016). Clade  
665 IVa basic helix-loop-helix transcription factors form part of a conserved jasmonate signaling  
666 circuit for the regulation of bioactive plant terpenoid biosynthesis. *Plant Cell Physiol.* **57**: 2564-  
667 2575.
- 668 **Montero-Vargas, J.M., Casarrubias-Castillo, K., Martínez-Gallardo, N., Ordaz-Ortiz, J.J., Délano-**  
669 **Frier, J.P., and Winkler, R.** (2018). Modulation of steroidal glycoalkaloid biosynthesis in  
670 tomato (*Solanum lycopersicum*) by jasmonic acid. *Plant Sci.* **277**: 155-165.
- 671 **Nakayasu, M., Shioya, N., Shikata, M., Thagun, C., Abdelkareem, A., Okabe, Y., Ariizumi, T.,**  
672 **Arimura, G.-i., Mizutani, M., Ezura, H., Hashimoto, T., and Shoji, T.** (2018). JRE4 is a  
673 master transcriptional regulator of defense-related steroidal glycoalkaloids in tomato. *Plant J.* **94**:  
674 975-990.
- 675 **Nakayasu, M., et al.** (2020). Identification of  $\alpha$ -tomatine 23-hydroxylase involved in the detoxification of  
676 a bitter glycoalkaloid. *Plant Cell Physiol.*, in press (10.1093/pcp/pcz224).

- 677 **Oberpichler, I., Rosen, R., Rasouly, A., Vugman, M., Ron, E.Z., and Lamparter, T.** (2008). Light  
678 affects motility and infectivity of *Agrobacterium tumefaciens*. *Environ. Microbiol.* **10**: 2020-2029.
- 679 **Pauwels, L., De Clercq, R., Goossens, J., Iñigo, S., Williams, C., Ron, M., Britt, A., and Goossens, A.**  
680 (2018). A dual sgRNA approach for functional genomics in *Arabidopsis thaliana*. *G3: Genes,*  
681 *Genomes, Genet.* **8**: 2603-2615.
- 682 **Ritter, A., et al.** (2017). The transcriptional repressor complex FRS7-FRS12 regulates flowering time and  
683 growth in *Arabidopsis*. *Nat. Commun.* **8**: 15235.
- 684 **Ron, M., et al.** (2014). Hairy root transformation using *Agrobacterium rhizogenes* as a tool for exploring  
685 cell type-specific gene expression and function using tomato as a model. *Plant Physiol.* **166**: 455-  
686 469.
- 687 **Sawai, S., et al.** (2014). Sterol side chain reductase 2 is a key enzyme in the biosynthesis of cholesterol,  
688 the common precursor of toxic steroidal glycoalkaloids in potato. *Plant Cell* **26**: 3763-3774.
- 689 **Schweizer, F., Fernández-Calvo, P., Zander, M., Diez-Diaz, M., Fonseca, S., Glauser, G., Lewsey,**  
690 **M.G., Ecker, J.R., Solano, R., and Reymond, P.** (2013). *Arabidopsis* basic helix-loop-helix  
691 transcription factors MYC2, MYC3, and MYC4 regulate glucosinolate biosynthesis, insect  
692 performance, and feeding behavior. *Plant Cell* **25**: 3117-3132.
- 693 **Sheard, L.B., et al.** (2010). Jasmonate perception by inositol-phosphate-potentiated COI1-JAZ co-  
694 receptor. *Nature* **468**: 400-405.
- 695 **Shoji, T.** (2019). The recruitment model of metabolic evolution: jasmonate-responsive transcription  
696 factors and a conceptual model for the evolution of metabolic pathways. *Front. Plant Sci.* **10**: 560.
- 697 **Shoji, T., and Hashimoto, T.** (2011). Tobacco MYC2 regulates jasmonate-inducible nicotine  
698 biosynthesis genes directly and by way of the *NIC2*-locus *ERF* genes. *Plant Cell Physiol.* **52**:  
699 1117-1130.
- 700 **Shoji, T., Ogawa, T., and Hashimoto, T.** (2008). Jasmonate-induced nicotine formation in tobacco is  
701 mediated by tobacco *COI1* and *JAZ* genes. *Plant Cell Physiol.* **49**: 1003-1012.
- 702 **Shoji, T., Kajikawa, M., and Hashimoto, T.** (2010). Clustered transcription factor genes regulate  
703 nicotine biosynthesis in tobacco. *Plant Cell* **22**: 3390-3409.
- 704 **Sonawane, P.D., et al.** (2018). Short-chain dehydrogenase/reductase governs steroidal specialized  
705 metabolites structural diversity and toxicity in the genus *Solanum*. *Proc. Natl. Acad. Sci. USA*  
706 **115**: E5419-E5428.
- 707 **Sonawane, P.D., et al.** (2016). Plant cholesterol biosynthetic pathway overlaps with phytosterol  
708 metabolism. *Nat. Plants* **3**: 16205.
- 709 **Spyropoulou, E.A., Haring, M.A., and Schuurink, R.C.** (2014). RNA sequencing on *Solanum*  
710 *lycopersicum* trichomes identifies transcription factors that activate terpene synthase promoters.  
711 *BMC Genomics* **15**: 402.
- 712 **Sun, J.-Q., Jiang, H.-L., and Li, C.-Y.** (2011). Systemin/jasmonate-mediated systemic defense signaling  
713 in tomato. *Mol. Plant* **4**: 607-615.
- 714 **Swinnen, G., Jacobs, T., Pauwels, L., and Goossens, A.** (2020). CRISPR-Cas-mediated gene knockout  
715 in tomato. *Methods Mol. Biol.* **2083**: 321-341.
- 716 **Thagun, C., et al.** (2016). Jasmonate-responsive ERF transcription factors regulate steroidal  
717 glycoalkaloid biosynthesis in tomato. *Plant Cell Physiol.* **57**: 961-975.
- 718 **Thines, B., Katsir, L., Melotto, M., Niu, Y., Mandaokar, A., Liu, G., Nomura, K., He, S.Y., Howe,**  
719 **G.A., and Browse, J.** (2007). JAZ repressor proteins are targets of the SCF<sup>COI1</sup> complex during  
720 jasmonate signalling. *Nature* **448**: 661-665.
- 721 **Townsley, B.T., Covington, M.F., Ichihashi, Y., Zumstein, K., and Sinha, N.R.** (2015). BrAD-seq:  
722 Breath Adapter Directional sequencing: a streamlined, ultra-simple and fast library preparation  
723 protocol for strand specific mRNA library construction. *Front. Plant Sci.* **6**: 366.
- 724 **Van Bel, M., Diels, T., Vancaester, E., Kreft, L., Botzki, A., Van de Peer, Y., Coppens, F., and**  
725 **Vandepoele, K.** (2018). PLAZA 4.0: an integrative resource for functional, evolutionary and  
726 comparative plant genomics. *Nucleic Acids Res.* **46**: D1190-D1196.



- 727 **Vanden Bossche, R., Demedts, B., Vanderhaeghen, R., and Goossens, A.** (2013). Transient expression  
728 assays in tobacco protoplasts. *Methods Mol. Biol.* **1011**: 227-239.
- 729 **Vanholme, R., et al.** (2013). Caffeoyl shikimate esterase (CSE) is an enzyme in the lignin biosynthetic  
730 pathway in *Arabidopsis*. *Science* **341**: 1103-1106.
- 731 **Wasternack, C., and Strnad, M.** (2019). Jasmonates are signals in the biosynthesis of secondary  
732 metabolites — Pathways, transcription factors and applied aspects — A brief review. *New*  
733 *Biotechnol.* **48**: 1-11.
- 734 **Xu, J., van Herwijnen, Z.O., Dräger, D.B., Sui, C., Haring, M.A., and Schuurink, R.C.** (2018).  
735 SIMYC1 regulates type VI glandular trichome formation and terpene biosynthesis in tomato  
736 glandular cells. *Plant Cell* **30**: 2988-3005.
- 737 **Xu, S., et al.** (2017). Wild tobacco genomes reveal the evolution of nicotine biosynthesis. *Proc. Natl.*  
738 *Acad. Sci. USA* **114**: 6133-6138.
- 739 **Yamanaka, T., Vincken, J.-P., Zuilhof, H., Legger, A., Takada, N., and Gruppen, H.** (2009). C22  
740 Isomerization in  $\alpha$ -tomatine-to-esculeoside a conversion during tomato ripening is driven by C27  
741 hydroxylation of triterpenoidal skeleton. *J. Agric. Food Chem.* **57**: 3786-3791.
- 742 **Yan, J., Yao, R., Chen, L., Li, S., Gu, M., Nan, F., and Xie, D.** (2018). Dynamic perception of  
743 jasmonates by the F-box protein COI1. *Mol. Plant* **11**: 1237-1247.
- 744 **Yan, J., Zhang, C., Gu, M., Bai, Z., Zhang, W., Qi, T., Cheng, Z., Peng, W., Luo, H., Nan, F., Wang,**  
745 **Z., and Xie, D.** (2009). The *Arabidopsis* CORONATINE INSENSITIVE1 protein is a jasmonate  
746 receptor. *Plant Cell* **21**: 2220-2236.
- 747 **Zouine, M., Maza, E., Djari, A., Lauvernier, M., Frasse, P., Smouni, A., Pirrello, J., and Bouzayen,**  
748 **M.** (2017). TomExpress, a unified tomato RNA-Seq platform for visualization of expression data,  
749 clustering and correlation networks. *Plant J.* **92**: 727-735.

750

751

## 752 **FIGURE LEGENDS**

753 **Figure 1.** MYC2 coordinates constitutive SGA biosynthesis in tomato. (A) Schematic  
754 representation of *MYC2* with location of the CRISPR-Cas9 cleavage sites. The dark grey box  
755 represents the exon. Cas9 cleavage sites for two guide RNAs are indicated with arrowheads. (B)  
756 Relative expression of cholesterologenesis genes, SGA biosynthesis genes, and *GAME9* analyzed  
757 by qPCR. Control hairy root lines expressing *pCaMV35S::GUS* (grey bars) and *myc2* lines  
758 (yellow bars) were treated for 24 h with 50  $\mu$ M of JA or an equal amount of ethanol. For control  
759 samples, cDNA of three biological replicates was pooled per independent line and treatment.  
760 Bars represent mean  $\log_2$ -transformed fold changes relative to the mean of three independent  
761 mock-treated control lines. Error bars denote standard error (n = 3). Individual mock- (●) and JA-  
762 treated (■) values are shown. Statistical significance was determined by ANOVA followed by  
763 Tukey post-hoc analysis (P<0.05; indicated by different letters). (C) Relative accumulation of  $\alpha$ -  
764 tomatine and dehydrotomatine analyzed by LC-MS. Control hairy root lines expressing  
765 *pCaMV35S::GUS* (grey bars) and *myc2* lines (yellow bars) were treated for 24 h with 50  $\mu$ M of  
766 JA or an equal amount of ethanol. Bars represent mean fold changes relative to the mean of  
767 mock-treated control<sup>#1</sup>. Error bars denote standard error (n=5). Individual mock- (●) and JA-  
768 treated (■) values are shown. Statistical significance was determined by ANOVA followed by  
769 Tukey post-hoc analysis (P<0.05; indicated by different letters). Abbreviations: *SSR2*, *STEROL*  
770 *SIDE CHAIN REDUCTASE 2*; *SMO3*, *C-4 STEROL METHYL OXIDASE 3*; *C14-R*, *STEROL C-*  
771 *14 REDUCTASE*; *7-DR2*, *7-DEHYDROCHOLESTEROL REDUCTASE 2*; *GUS*,  $\beta$ -  
772 *glucuronidase*.

773 **Figure 2.** MYC2 helps ensure JA-induced polyamine production in tomato. (A) Relative  
774 expression of *JAZ1* and *ODC* analyzed by qPCR. Control hairy root lines expressing  
775 *pCaMV35S::GUS* (grey bars) and *myc2* lines (yellow bars) were treated for 24 h with 50  $\mu$ M of  
776 JA or an equal amount of ethanol. For control samples, cDNA of three biological replicates was  
777 pooled per independent line and treatment. Bars represent mean  $\log_2$ -transformed fold changes  
778 relative to the mean of three independent mock-treated control lines. Error bars denote standard  
779 error (n = 3). Individual mock- (●) and JA-treated (■) values are shown. Statistical significance  
780 was determined by ANOVA followed by Tukey post-hoc analysis (P<0.05; indicated by different  
781 letters). (B) Relative accumulation of tris(dihydrocaffeoyl)spermine and *N*-caffeoylputrescine

782 analyzed by LC-MS. Control hairy root lines expressing *pCaMV35S::GUS* (grey bars) and *myc2*  
783 lines (yellow bars) were treated for 24 h with 50  $\mu$ M of JA or an equal amount of ethanol. Bars  
784 represent mean fold changes relative to the mean of mock-treated control<sup>#1</sup>. Error bars denote  
785 standard error (n=5). Individual mock- (●) and JA-treated (■) values are shown. Statistical  
786 significance was determined by ANOVA followed by Tukey post-hoc analysis (P<0.05; indicated  
787 by different letters). Abbreviations: DHC, dihydrocaffeoyl; *GUS*,  $\beta$ -glucuronidase.

788 **Figure 3.** Tomato has two clade IIIe bHLH family members. (A) Phylogenetic analysis of  
789 *Arabidopsis thaliana* and Solanaceae bHLH clade IIIe members using MUSCLE and the  
790 Maximum Likelihood method. The tree is drawn to scale, with branch lengths measured in the  
791 number of substitutions per site. The analysis involved amino acid sequences from *Capsicum*  
792 *annuum* (CAN.G1216.16, CAN.G298.8), *Solanum tuberosum* (PGSC0003DMG400001161,  
793 PGSC0003DMG400017535), *S. lycopersicum* (Solyc08g005050.2, Solyc08g076930.1.1),  
794 *Petunia axillaris* (Peaxi162Scf00045g00011, Peaxi162Scf00460g00011), *Nicotiana tabacum*  
795 (NP\_001312938.1, NP\_001311866.1, NP\_001312960.1, NP\_001313001.1), and *A. thaliana*  
796 (AT1G32640, AT5G46830, AT5G46760, AT4G17880). The *A. thaliana* bHLH clade IVa  
797 member bHLH25 (AT4G37850) was used to root the tree. Numbers shown are bootstrap values  
798 in percentages (based on 1,000 replicates). Evolutionary analyses were conducted in MEGA7  
799 (Kumar et al., 2016). (B) Normalized *MYC1* and *MYC2* expression profiles in different organs  
800 and developmental stages (cultivar Heinz 1706). Expression data were obtained from  
801 TomExpress (Zouine et al., 2017). (C) Relative expression of *MYC1* and *MYC2* analyzed by  
802 qPCR. Control hairy root lines expressing *pCaMV35S::GUS* were treated for 24 h with 50  $\mu$ M of  
803 JA or an equal amount of ethanol. The cDNA of three biological replicates was pooled per  
804 independent line and treatment. Bars represent mean log<sub>2</sub>-transformed fold changes relative to the  
805 mean of three independent mock-treated control lines. Error bars denote standard error (n=3).  
806 Individual mock- (●) and JA-treated (■) values are shown. Statistical significance was  
807 determined by unpaired Student's *t*-tests (\*\*, P<0.01). Abbreviations: 1 cm, 1 cm immature green  
808 fruit; 2 cm, 2 cm immature green fruit; 3 cm, 3 cm immature green fruit; MG, mature green fruit;  
809 BR, breaker fruit; RR, red ripe (breaker + 10 days) fruit.

810 **Figure 4.** MYC1 and MYC2 transactivate the promoter of *C5-SD2* together with GAME9. (A-C)  
811 Tobacco BY-2 protoplasts were transfected with a *pC5-SD2(1549 bp)::fLUC* (A), *pC5-SD2(333*

812 *bp*::*fLUC* (B), *pC5-SD2*(333 *bp* with mutated *G-box*::*fLUC* or *pC5-SD2*(207 *bp* without *G-*  
813 *box*::*fLUC* (C) reporter construct and effector constructs overexpressing *MYC1*, *MYC2*, *GAME9*  
814 or a combination thereof. A *pCaMV35S*::*rLUC* construct was co-transfected for normalization of  
815 *fLUC* activity. Bars represent mean fold changes relative to the mean of protoplasts transfected  
816 with a *pCaMV35S*::*GUS* control construct (grey bar). Dashed lines represent the 2-fold cut off for  
817 promoter transactivation. Error bars denote standard error (n = 8). Statistical significance was  
818 determined by unpaired Student's *t*-tests (\*, P<0.05; \*\*, P<0.01; \*\*\*, P<0.001; \*\*\*\*, P<0.0001).  
819 Abbreviations: BY-2, Bright Yellow-2; *pC5-SD2*, promoter of *C5-SD2*; *GUS*,  $\beta$ -glucuronidase.

820 **Figure 5.** *MYC1* regulates constitutive expression of SGA biosynthesis genes in tomato. (A)  
821 Schematic representation of *MYC1* with location of the CRISPR-Cas9 cleavage sites. The dark  
822 grey box represents the exon and light grey boxes represent the UTRs. Cas9 cleavage sites for  
823 two guide RNAs are indicated with arrowheads. (B) Relative expression of cholesterologenesis  
824 genes, SGA biosynthesis genes, and *GAME9* analyzed by qPCR. Control hairy root lines  
825 expressing *pCaMV35S*::*GUS* (grey bars) and *myc1* lines (blue bars) were treated for 24 h with 50  
826  $\mu$ M of JA or an equal amount of ethanol. For control samples, cDNA of three biological  
827 replicates was pooled per independent line and treatment. Bars represent mean log<sub>2</sub>-transformed  
828 fold changes relative to the mean of three independent mock-treated control lines. Error bars  
829 denote standard error (n = 3). Individual mock- (●) and JA-treated (■) values are shown.  
830 Statistical significance was determined by ANOVA followed by Tukey post-hoc analysis (P <  
831 0.05; indicated by different letters). (C) Relative accumulation of  $\alpha$ -tomatine and  
832 dehydrotomatine analyzed by LC-MS. Control hairy root lines expressing *pCaMV35S*::*GUS*  
833 (grey bars) and *myc1* lines (blue bars) were treated for 24 h with 50  $\mu$ M of JA or an equal amount  
834 of ethanol. Bars represent mean fold changes relative to the mean of mock-treated control<sup>#1</sup>. Error  
835 bars denote standard error (n=5). Individual mock- (●) and JA-treated (■) values are shown.  
836 Statistical significance was determined by ANOVA followed by Tukey post-hoc analysis (P  
837 <0.05; indicated by different letters). Abbreviations: *SSR2*, *STEROL SIDE CHAIN REDUCTASE*  
838 *2*; *SMO3*, *C-4 STEROL METHYL OXIDASE 3*; *C14-R*, *STEROL C-14 REDUCTASE*; *7-DR2*, *7-*  
839 *DEHYDROCHOLESTEROL REDUCTASE 2*; UTR, untranslated region; *GUS*,  $\beta$ -glucuronidase.

840 **Figure 6.** *MYC1* helps ensure JA-induced polyamine biosynthesis in tomato. (A) Relative  
841 expression of *JAZ1* and *ODC* analyzed by qPCR. Control hairy root lines expressing

842 *pCaMV35S::GUS* (grey bars) and *myc1* lines (blue bars) were treated for 24 h with 50  $\mu$ M of JA  
843 or an equal amount of ethanol. For control samples, cDNA of three biological replicates was  
844 pooled per independent line and treatment. Bars represent mean  $\log_2$ -transformed fold changes  
845 relative to the mean of three independent mock-treated control lines. Error bars denote standard  
846 error (n = 3). Individual mock- (●) and JA-treated (■) values are shown. Statistical significance  
847 was determined by ANOVA followed by Tukey post-hoc analysis (P<0.05; indicated by different  
848 letters). (B) Relative accumulation of tris(dihydrocaffeoyl)spermine and *N*-caffeoylputrescine  
849 analyzed by LC-MS. Control hairy root lines expressing *pCaMV35S::GUS* (grey bars) and *myc1*  
850 lines (blue bars) were treated for 24 h with 50  $\mu$ M of JA or an equal amount of ethanol. Bars  
851 represent mean fold changes relative to the mean of mock-treated control<sup>#1</sup>. Error bars denote  
852 standard error (n=5). Individual mock- (●) and JA-treated (■) values are shown. Statistical  
853 significance was determined by ANOVA followed by Tukey post-hoc analysis (P<0.05; indicated  
854 by different letters). Abbreviations: DHC, dihydrocaffeoyl; *GUS*,  $\beta$ -glucuronidase.

855 **Figure 7.** MYC1 and MYC2 redundantly regulate constitutive SGA biosynthesis in tomato. (A)  
856 Relative expression of cholesterologenesis genes, SGA biosynthesis genes, and *GAME9* analyzed  
857 by qPCR. Control hairy root lines expressing *pCaMV35S::GUS* (grey bars) and a *myc1 myc2*  
858 (*myc12*) line (green bars) were treated for 24 h with 50  $\mu$ M of JA or an equal amount of ethanol.  
859 For control samples, cDNA of three biological replicates was pooled per independent line and  
860 treatment. Bars represent mean  $\log_2$ -transformed fold changes relative to the mean of three  
861 independent mock-treated control lines. Error bars denote standard error (n=3). Individual mock-  
862 (●) and JA-treated (■) values are shown. Statistical significance was determined by ANOVA  
863 followed by Tukey post-hoc analysis (P<0.05; indicated by different letters). (B) Relative  
864 accumulation of  $\alpha$ -tomatine and dehydrotomatine analyzed by LC-MS. Control hairy root lines  
865 expressing *pCaMV35S::GUS* (grey bars) and a *myc1 myc2 (myc12)* line (green bars) were treated  
866 for 24 h with 50  $\mu$ M of JA or an equal amount of ethanol. Bars represent mean fold changes  
867 relative to the mean of mock-treated control<sup>#1</sup>. Error bars denote standard error (n = 5). Individual  
868 mock- (●) and JA-treated (■) values are shown. Statistical significance was determined by  
869 ANOVA followed by Tukey post-hoc analysis (P < 0.05; indicated by different letters).  
870 Abbreviations: *SSR2*, *STEROL SIDE CHAIN REDUCTASE 2*; *SMO3*, *C-4 STEROL METHYL*

871 *OXIDASE 3; C14-R, STEROL C-14 REDUCTASE; 7-DR2, 7-DEHYDROCHOLESTEROL*  
872 *REDUCTASE 2; GUS,  $\beta$ -glucuronidase.*

873 **Figure 8.** MYC1 and MYC2 redundantly regulate JA-induced polyamine accumulation in  
874 tomato. (A) Relative expression of *JAZ1* and *ODC* analyzed by qPCR. Control hairy root lines  
875 expressing *pCaMV35S::GUS* (grey bars) and a *myc1 myc2 (myc12)* line (green bars) were treated  
876 for 24 h with 50  $\mu$ M of JA or an equal amount of ethanol. For control samples, cDNA of three  
877 biological replicates was pooled per independent line and treatment. Bars represent mean log<sub>2</sub>-  
878 transformed fold changes relative to the mean of three independent mock-treated control lines.  
879 Error bars denote standard error (n = 3). Individual mock- (●) and JA-treated (■) values are  
880 shown. Statistical significance was determined by ANOVA followed by Tukey post-hoc analysis  
881 (P<0.05; indicated by different letters). (B) Relative accumulation of  
882 tris(dihydrocaffeoyl)spermine and *N*-caffeoylputrescine analyzed by LC-MS. Control hairy root  
883 lines expressing *pCaMV35S::GUS* (grey bars) and a *myc1 myc2 (myc12)* line (green bars) were  
884 treated for 24 h with 50  $\mu$ M of JA or an equal amount of ethanol. Bars represent mean fold  
885 changes relative to the mean of mock-treated control<sup>#1</sup>. Error bars denote standard error (n=5).  
886 Individual mock- (●) and JA-treated (■) values are shown. Statistical significance was  
887 determined by ANOVA followed by Tukey post-hoc analysis (P<0.05; indicated by different  
888 letters). Abbreviations: DHC, dihydrocaffeoyl; *GUS*,  $\beta$ -glucuronidase.

889 **Figure 9.** Constitutive SGA biosynthesis partially depends on COI1-mediated JA signaling. (A)  
890 Schematic representation of *COI1* with location of the CRISPR-Cas9 cleavage sites. Dark grey  
891 boxes represent exons, solid lines represent introns, and light grey boxes represent UTRs. Cas9  
892 cleavage sites for two guide RNAs are indicated with arrowheads. (B) Relative expression of  
893 cholesterologenesis genes, SGA biosynthesis genes, and *GAME9* analyzed by qPCR. Control hairy  
894 root lines expressing *pCaMV35S::GUS* (grey bars) and *coi1* lines (pink bars) were treated for  
895 24 h with 50  $\mu$ M of JA or an equal amount of ethanol. For control samples, cDNA of three  
896 biological replicates was pooled per independent line and treatment. Bars represent mean log<sub>2</sub>-  
897 transformed fold changes relative to the mean of three independent mock-treated control lines.  
898 Error bars denote standard error (n=3). Individual mock- (●) and JA-treated (■) values are  
899 shown. Statistical significance was determined by ANOVA followed by Tukey post-hoc analysis  
900 (P < 0.05; indicated by different letters). (C) Relative accumulation of  $\alpha$ -tomatine and

901 dehydrotomatine analyzed by LC-MS. Control hairy root lines expressing *pCaMV35S::GUS*  
902 (grey bars) and *coi1* lines (pink bars) were treated for 24 h with 50  $\mu$ M of JA or an equal amount  
903 of ethanol. Bars represent mean fold changes relative to the mean of mock-treated control<sup>#1</sup>. Error  
904 bars denote standard error (n=5). Individual mock- (●) and JA-treated (■) values are shown.  
905 Statistical significance was determined by ANOVA followed by Tukey post-hoc analysis  
906 (P<0.05; indicated by different letters). Abbreviations: *SSR2*, *STEROL SIDE CHAIN*  
907 *REDUCTASE 2*; *SMO3*, *C-4 STEROL METHYL OXIDASE 3*; *C14-R*, *STEROL C-14*  
908 *REDUCTASE*; *7-DR2*, *7-DEHYDROCHOLESTEROL REDUCTASE 2*; UTR, untranslated  
909 region; *GUS*,  $\beta$ -glucuronidase.

910 **Figure 10.** JA-induced polyamine biosynthesis depends on COI1-mediated JA signaling. (A)  
911 Relative expression of *JAZ1* and *ODC* analyzed by qPCR. Control hairy root lines expressing  
912 *pCaMV35S::GUS* (grey bars) and *coi1* lines (pink bars) were treated for 24 h with 50  $\mu$ M of JA  
913 or an equal amount of ethanol. For control samples, cDNA of three biological replicates was  
914 pooled per independent line and treatment. Bars represent mean log<sub>2</sub>-transformed fold changes  
915 relative to the mean of three independent mock-treated control lines. Error bars denote standard  
916 error (n = 3). Individual mock- (●) and JA-treated (■) values are shown. Statistical significance  
917 was determined by ANOVA followed by Tukey post-hoc analysis (P<0.05; indicated by different  
918 letters). (B) Relative accumulation of tris(dihydrocaffeoyl)spermine and *N*-caffeoylputrescine  
919 analyzed by LC-MS. Control hairy root lines expressing *pCaMV35S::GUS* (grey bars) and *coi1*  
920 lines (pink bars) were treated for 24 h with 50  $\mu$ M of JA or an equal amount of ethanol. Bars  
921 represent mean fold changes relative to the mean of mock-treated control<sup>#1</sup>. Error bars denote  
922 standard error (n=5). Individual mock- (●) and JA-treated (■) values are shown. Statistical  
923 significance was determined by ANOVA followed by Tukey post-hoc analysis (P<0.05; indicated  
924 by different letters). Abbreviations: DHC, dihydrocaffeoyl; *GUS*,  $\beta$ -glucuronidase.

925 **Figure 11.** Genome editing of a G-box decreases constitutive *C5-SD2* expression. (A) Schematic  
926 representation of *C5-SD2* with location of the CRISPR-Cas9 cleavage site and G-box mutant  
927 sequences. Dark grey boxes represent exons, solid lines represent introns, and light grey boxes  
928 represent UTRs. The Cas9 cleavage site for the guide RNA targeting the G-box is indicated with  
929 an arrowhead. Sequences of three independent G-box mutant (*g*) lines are shown. G-box  
930 sequence is indicated in green font, the Cas9(VQR) PAM is marked in purple, inserted bases are

931 shown in purple, deleted bases are replaced by a dash, and sequence gap length is shown between  
932 parentheses. Bases that make up an alternative G-box are green underlined. (B) Relative  
933 expression of cholesterologenesis genes, SGA biosynthesis genes, and *GAME9* analyzed by qPCR.  
934 Control hairy root lines expressing *pCaMV35S::GUS* (grey bars) and *g* lines (purple bars) were  
935 treated for 24 h with 50  $\mu$ M of JA or an equal amount of ethanol. For control samples, cDNA of  
936 three biological replicates was pooled per independent line and treatment. Bars represent mean  
937  $\log_2$ -transformed fold changes relative to the mean of three independent mock-treated control  
938 lines. Error bars denote standard error (n=3). Individual mock- (●) and JA-treated (■) values are  
939 shown. Statistical significance was determined by ANOVA followed by Tukey post-hoc analysis  
940 (P<0.05; indicated by different letters). (C) Tobacco BY-2 protoplasts were transfected with a  
941 *pC5-SD2(g<sup>#1</sup>; 1406 bp)::fLUC*, *pC5-SD2(g<sup>#2</sup>; 1406 bp)::fLUC* or *pC5-SD2(g<sup>#3</sup>; 1406 bp)::fLUC*  
942 reporter construct and effector constructs overexpressing *MYC2* and *GAME9*. A  
943 *pCaMV35S::rLUC* construct was co-transfected for normalization of fLUC activity. Bars  
944 represent mean fold changes relative to the mean of protoplasts transfected with a *pC5-SD2(WT;*  
945 *1406 bp)::fLUC* reporter construct and a *pCaMV35S::GUS* control construct. Dashed lines  
946 represent the 2-fold cut off for promoter transactivation. Error bars denote standard error (n = 8).  
947 Statistical significance was determined by ANOVA followed by Tukey post-hoc analysis  
948 (P<0.05; indicated by different letters). (D) Relative accumulation of  $\alpha$ -tomatine and  
949 dehydrotomatine analyzed by LC-MS. Control hairy root lines expressing *pCaMV35S::GUS*  
950 (grey bars) and *g* lines (purple bars) were treated for 24 h with 50  $\mu$ M of JA or an equal amount  
951 of ethanol. Bars represent mean fold changes relative to the mean of mock-treated control<sup>#1</sup>. Error  
952 bars denote standard error (n=5). Individual mock- (●) and JA-treated (■) values are shown.  
953 Statistical significance was determined by ANOVA followed by Tukey post-hoc analysis  
954 (P<0.05; indicated by different letters). Abbreviations: *SSR2*, *STEROL SIDE CHAIN*  
955 *REDUCTASE 2*; *SMO3*, *C-4 STEROL METHYL OXIDASE 3*; *C14-R*, *STEROL C-14*  
956 *REDUCTASE*; *7-DR2*, *7-DEHYDROCHOLESTEROL REDUCTASE 2*; UTR, untranslated  
957 region; PAM, protospacer adjacent motif; *GUS*,  $\beta$ -glucuronidase; BY-2, Bright Yellow-2; *pC5-*  
958 *SD2*, promoter of *C5-SD2*.

## 959 TABLES

---

**Table 1.** Genes Differentially Expressed Between Mock-Treated Wild-Type and *MYC2-RNAi* Tomato Seedlings That Belong to bHLH Clade IIIe or Are Responsible for SGA Biosynthesis

---



| SolycID                                                                                         | Gene Name     | Log <sub>2</sub> Fold Change <sup>a</sup> | Adjusted P Value        |
|-------------------------------------------------------------------------------------------------|---------------|-------------------------------------------|-------------------------|
| bHLH Clade IIIe Transcription Factors:                                                          |               |                                           |                         |
| Solyc08g076930.1.1                                                                              | <i>MYC2</i>   | -1.33                                     | $1.28 \times 10^{-31}$  |
| Solyc08g005050.2.1                                                                              | <i>MYC1</i>   | -0.45                                     | $3.82 \times 10^{-2}$   |
| Cholesterol and Phytosterol Biosynthesis Pathway:                                               |               |                                           |                         |
| Solyc04g070980.2.1                                                                              | <i>CAS</i>    | -0.53                                     | $1.08 \times 10^{-9}$   |
| Solyc02g081730.2.1                                                                              | <i>3bHSD2</i> | -0.78                                     | $1.36 \times 10^{-7}$   |
| Solyc12g098640.1.1                                                                              | <i>CPI</i>    | -0.44                                     | $3.75 \times 10^{-3}$   |
| Solyc01g008110.2.1                                                                              | <i>CYP51</i>  | -0.34                                     | $6.91 \times 10^{-6}$   |
| Solyc09g009040.2.1                                                                              | <i>C14-R</i>  | -0.55                                     | $4.35 \times 10^{-5}$   |
| Solyc06g082980.2.1                                                                              | <i>8,7-SI</i> | -0.98                                     | $2.50 \times 10^{-24}$  |
| Cholesterol Biosynthesis Pathway:                                                               |               |                                           |                         |
| Solyc02g069490.2.1                                                                              | <i>SSR2</i>   | -1.07                                     | $1.79 \times 10^{-8}$   |
| Solyc01g091320.2.1                                                                              | <i>SMO3</i>   | -1.20                                     | $2.13 \times 10^{-19}$  |
| Solyc06g005750.2.1                                                                              | <i>SMO4</i>   | -0.85                                     | $1.09 \times 10^{-15}$  |
| Solyc02g086180.2.1                                                                              | <i>C5-SD2</i> | -1.60                                     | $6.10 \times 10^{-66}$  |
| Solyc06g074090.2.1                                                                              | <i>7-DR2</i>  | -0.97                                     | $3.09 \times 10^{-9}$   |
| SGA Biosynthesis Pathway:                                                                       |               |                                           |                         |
| Solyc07g043420.2.1                                                                              | <i>GAME11</i> | -1.39                                     | $3.93 \times 10^{-139}$ |
| Solyc07g043460.2.1                                                                              | <i>GAME6</i>  | -1.52                                     | $5.27 \times 10^{-69}$  |
| Solyc12g006460.1.1                                                                              | <i>GAME4</i>  | -0.70                                     | $4.63 \times 10^{-12}$  |
| Solyc12g006470.1.1                                                                              | <i>GAME12</i> | -1.15                                     | $2.25 \times 10^{-106}$ |
| Solyc01g073640.2.1                                                                              | <i>GAME25</i> | -0.87                                     | $3.67 \times 10^{-46}$  |
| Solyc07g043490.1.1                                                                              | <i>GAME1</i>  | -1.13                                     | $8.10 \times 10^{-21}$  |
| Solyc07g043480.1.1                                                                              | <i>GAME17</i> | -0.89                                     | $5.49 \times 10^{-14}$  |
| Solyc07g043500.1.1                                                                              | <i>GAME18</i> | -1.31                                     | $8.40 \times 10^{-20}$  |
| RNA-seq data was previously published in (Du et al., 2017).                                     |               |                                           |                         |
| <sup>a</sup> Mean expression ratios calculated from three biologically independent experiments. |               |                                           |                         |

960

961

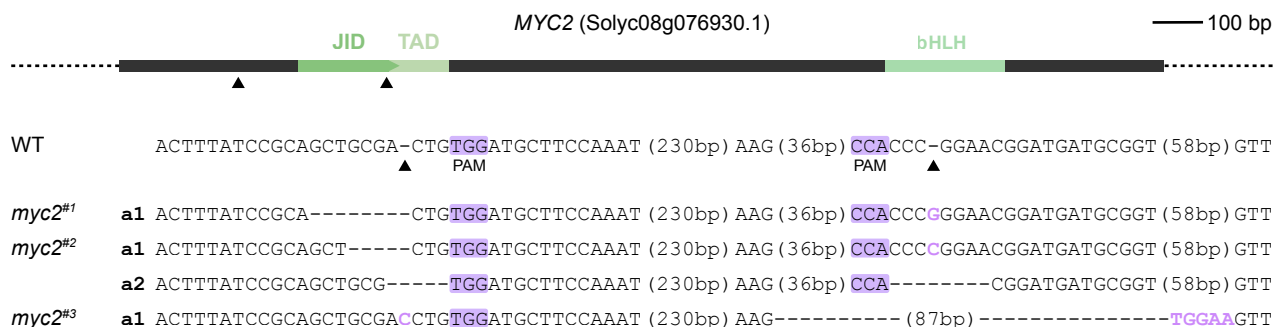

**Supplemental Figure 1.** Schematic representation of *MYC2* with location of the CRISPR-Cas9 cleavage sites and *myc2* mutant sequences. The dark grey box represents the exon. Green boxes represent encoded protein domains. Cas9 cleavage sites for guide RNAs are indicated with arrowheads. Allele sequences of three independent *myc2* lines are shown. PAMs are marked in purple, inserted bases are shown in purple, deleted bases are replaced by a dash, and sequence gap length is shown between parentheses. Abbreviations: JID, JAZ interaction domain; TAD, transactivation domain; WT, wild-type; PAM, protospacer adjacent motif.

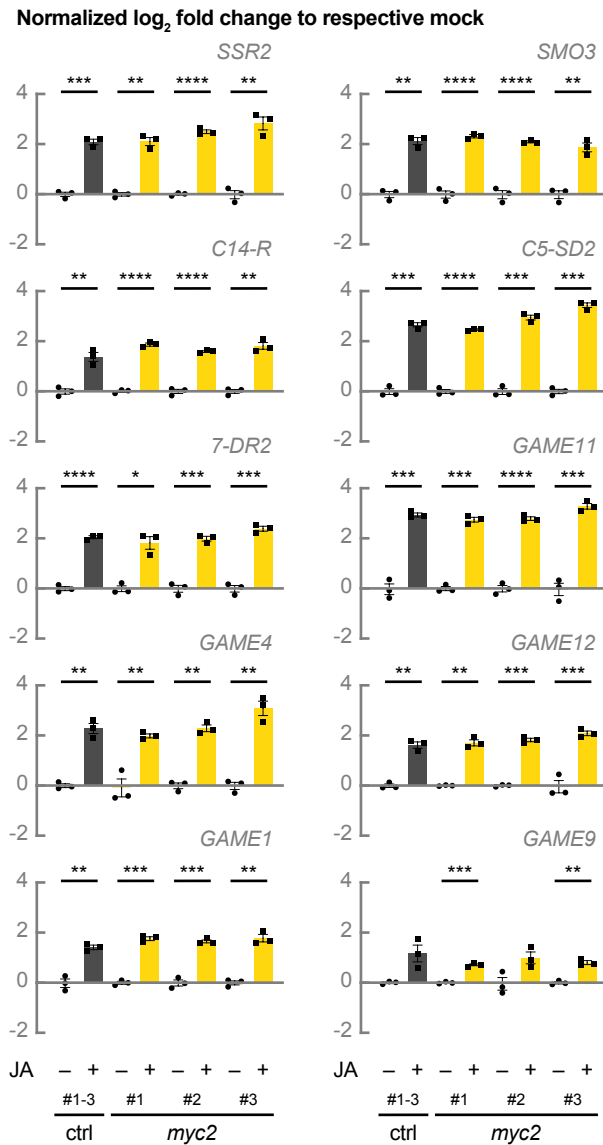

**Supplemental Figure 2.** Unaffected JA inducibility of SGA biosynthesis gene expression in *myc2* lines. Alternative representation of relative expression of cholesterologenesis genes, SGA biosynthesis genes, and *GAME9* shown in Figure 1. Control hairy root lines expressing *pCaMV35S::GUS* (grey bars) and *myc2* lines (yellow bars) were treated for 24 h with 50  $\mu$ M of JA or an equal amount of ethanol. For control samples, cDNA of three biological replicates was pooled per independent line and treatment. Bars represent mean log<sub>2</sub>-transformed fold changes relative to the mean of the respective mock-treated line. Error bars denote standard error (n = 3). Individual mock- (●) and JA-treated (■) values are shown. Statistical significance was determined by unpaired Student's *t*-tests (\*, P<0.05; \*\*, P<0.01; \*\*\*, P<0.001; \*\*\*\*, P<0.0001). Abbreviations: *SSR2*, *STEROL SIDE CHAIN REDUCTASE 2*; *SMO3*, *C-4 STEROL METHYL OXIDASE 3*; *C14-R*, *STEROL C-14 REDUCTASE*; *7-DR2*, *7-DEHYDROCHOLESTEROL REDUCTASE 2*; *GUS*,  $\beta$ -glucuronidase.

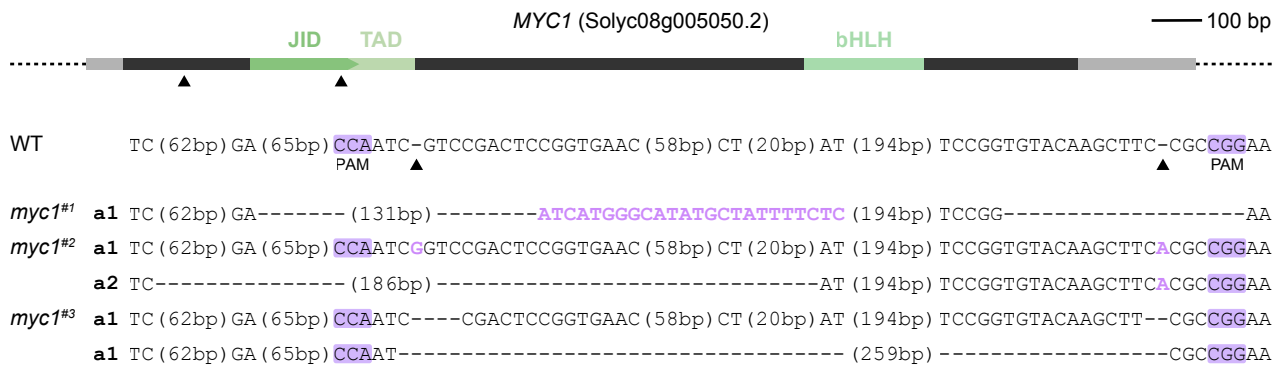

**Supplemental Figure 3.** Schematic representation of *MYC1* with location of the CRISPR-Cas9 cleavage sites and *myc1* mutant sequences. The dark grey box represents the exon and light grey boxes represent UTRs. Green boxes represent encoded protein domains. Cas9 cleavage sites for guide RNAs are indicated with arrowheads. Allele sequences of three independent *myc1* lines are shown. PAMs are marked in purple, inserted bases are shown in purple, deleted bases are replaced by a dash, and sequence gap length is shown between parentheses. Abbreviations: JID, JAZ interaction domain; TAD, transactivation domain; WT, wild-type; PAM, protospacer adjacent motif; UTR, untranslated region.

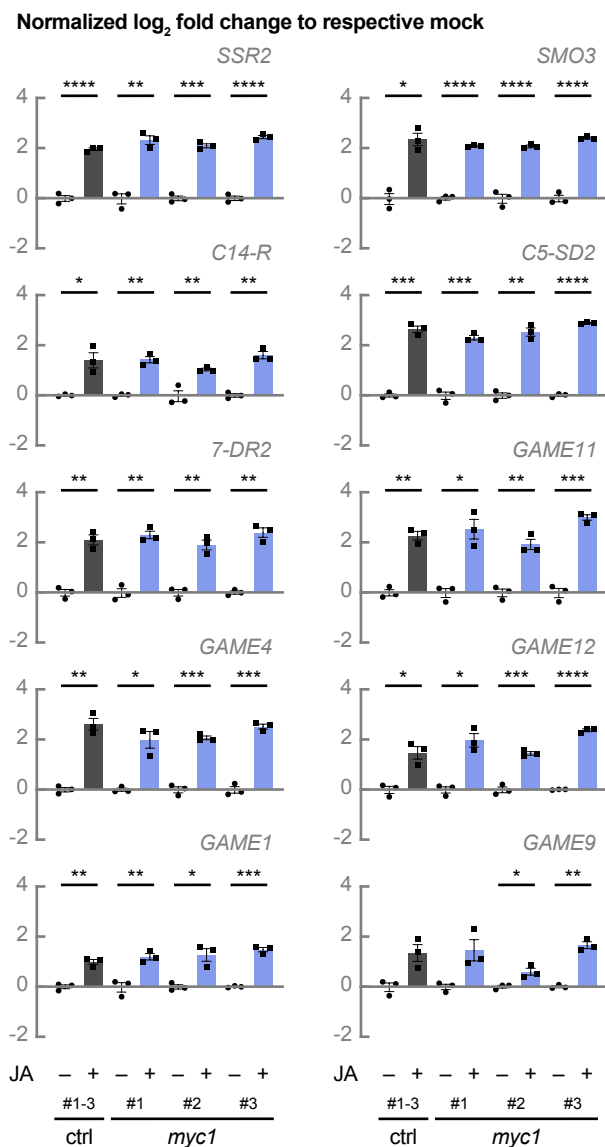

**Supplemental Figure 4.** Unaffected JA inducibility of SGA biosynthesis gene expression in *myc1* lines. Alternative representation of relative expression of cholesterologenesis genes, SGA biosynthesis genes, and *GAME9* shown in Figure 5. Control hairy root lines expressing *pCaMV35S::GUS* (grey bars) and *myc1* lines (blue bars) were treated for 24 h with 50  $\mu$ M of JA or an equal amount of ethanol. For control samples, cDNA of three biological replicates was pooled per independent line and treatment. Bars represent mean log<sub>2</sub>-transformed fold changes relative to the mean of the respective mock-treated line. Error bars denote standard error (n = 3). Individual mock- (●) and JA-treated (■) values are shown. Statistical significance was determined by unpaired Student's *t*-tests (\*, P<0.05; \*\*, P<0.01; \*\*\*, P<0.001; \*\*\*\*, P<0.0001). Abbreviations: *SSR2*, *STEROL SIDE CHAIN REDUCTASE 2*; *SMO3*, *C-4 STEROL METHYL OXIDASE 3*; *C14-R*, *STEROL C-14 REDUCTASE*; *7-DR2*, *7-DEHYDROCHOLESTEROL REDUCTASE 2*; *GUS*,  $\beta$ -glucuronidase.

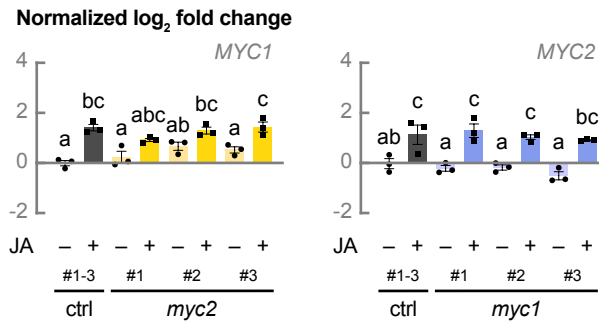

**Supplemental Figure 5.** *myc2* and *myc1* lines do not exhibit upregulated expression of *MYC1* and *MYC2*, respectively. Relative expression of *MYC1* and *MYC2* analyzed by qPCR. Control hairy root lines expressing *pCaMV35S::GUS* (grey bars), *myc2* (yellow bars), and *myc1* lines (blue bars) were treated for 24 h with 50  $\mu$ M of JA or an equal amount of ethanol. For control samples, cDNA of three biological replicates was pooled per independent line and treatment. Bars represent mean log<sub>2</sub>-transformed fold changes relative to the mean of three independent mock-treated control lines. Error bars denote standard error (n=3). Individual mock- (●) and JA-treated (■) values are shown. Statistical significance was determined by ANOVA followed by Tukey post-hoc analysis (P < 0.05; indicated by different letters). Abbreviations: *GUS*,  $\beta$ -glucuronidase.

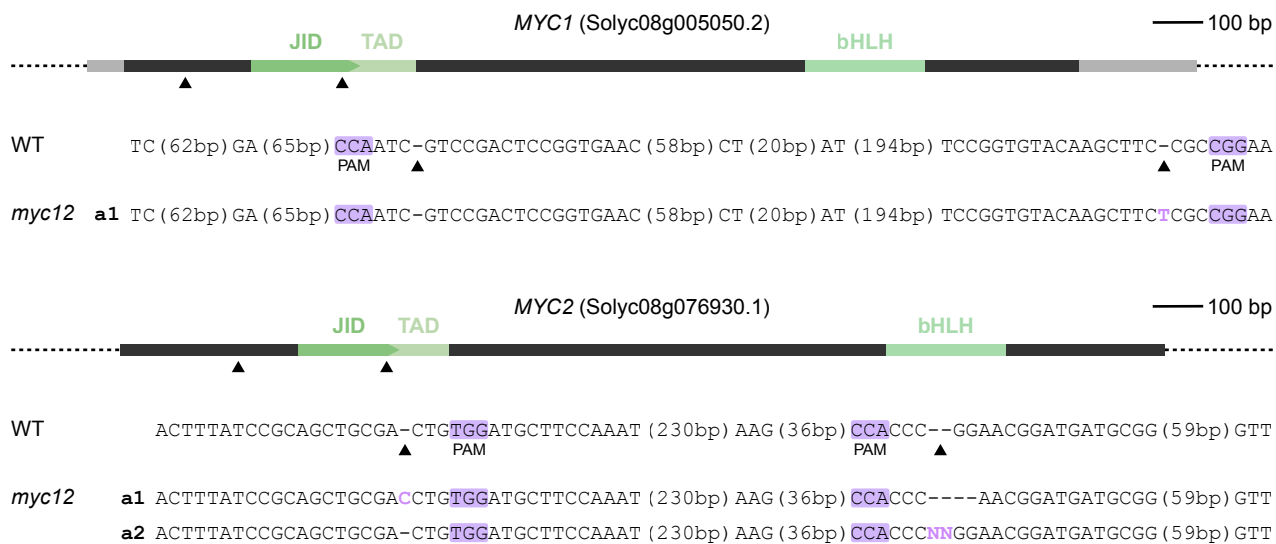

**Supplemental Figure 6.** Schematic representation of *MYC1* and *MYC2* with location of the CRISPR-Cas9 cleavage sites and *myc1 myc2* mutant sequences. Dark grey boxes represent exons and light grey boxes represent UTRs. Green boxes represent encoded protein domains. Cas9 cleavage sites for guide RNAs are indicated with arrowheads. Allele sequences of one independent *myc1 myc2* (*myc12*) line are shown. PAMs are marked in purple, inserted bases are shown in purple, deleted bases are replaced by a dash, and sequence gap length is shown between parentheses. Abbreviations: JID, JAZ interaction domain; TAD, transactivation domain; WT, wild-type; PAM, protospacer adjacent motif; UTR, untranslated region.

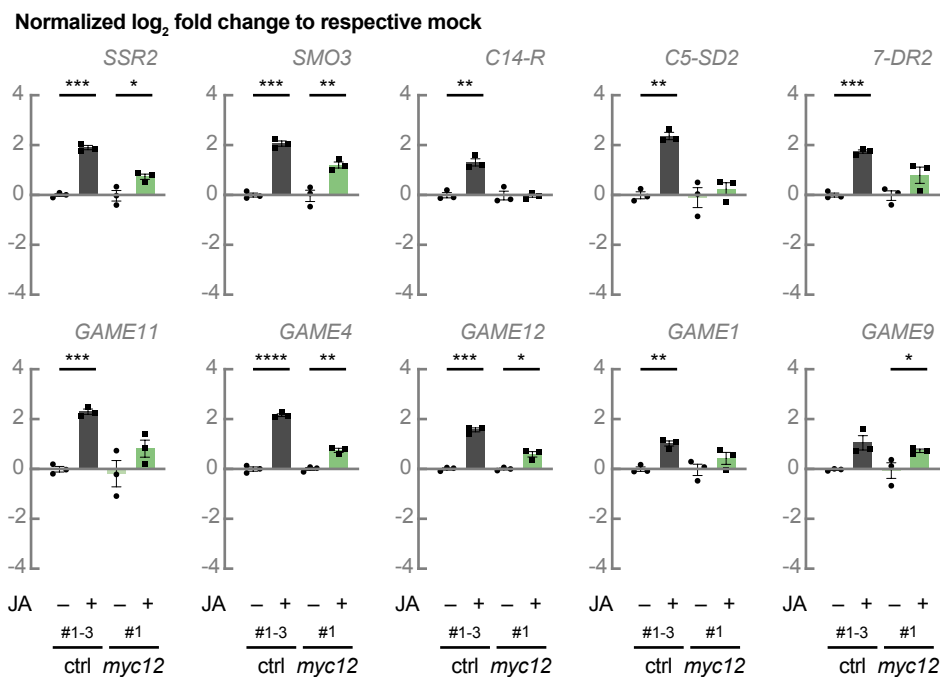

**Supplemental Figure 7.** Reduced or absent JA inducibility of SGA biosynthesis gene expression in a *myc1 myc2* line. Alternative representation of relative expression of cholesterologenesis genes, SGA biosynthesis genes, and *GAME9* shown in Figure 7. Control hairy root lines expressing *pCaMV35S::GUS* (grey bars) and a *myc1 myc2* (*myc12*) line (green bars) were treated for 24 h with 50  $\mu$ M of JA or an equal amount of ethanol. For control samples, cDNA of three biological replicates was pooled per independent line and treatment. Bars represent mean log<sub>2</sub>-transformed fold changes relative to the mean of the respective mock-treated line. Error bars denote standard error (n = 3). Individual mock- (●) and JA-treated (■) values are shown. Statistical significance was determined by unpaired Student's *t*-tests (\*, P < 0.05; \*\*, P < 0.01; \*\*\*, P < 0.001; \*\*\*\*, P < 0.0001). Abbreviations: *SSR2*, *STEROL SIDE CHAIN REDUCTASE 2*; *SMO3*, *C-4 STEROL METHYL OXIDASE 3*; *C14-R*, *STEROL C-14 REDUCTASE*; *7-DR2*, *7-DEHYDROCHOLESTEROL REDUCTASE 2*; *GUS*,  $\beta$ -glucuronidase.



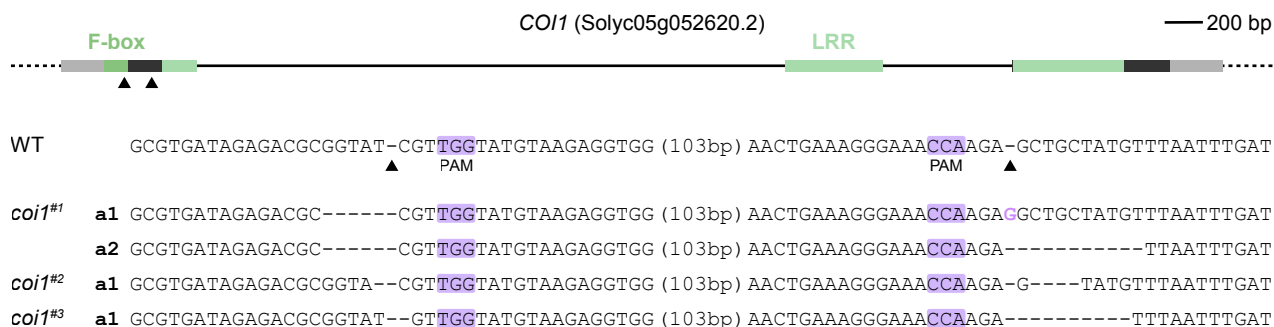

**Supplemental Figure 8.** Schematic representation of *COI1* with location of the CRISPR-Cas9 cleavage sites and *coi1* mutant sequences. Dark grey boxes represent exons, solid lines introns, and light grey boxes UTRs. Green boxes represent encoded protein domains. Cas9 cleavage sites for guide RNAs are indicated with arrowheads. Allele sequences of three independent *coi1* lines are shown. PAMs are marked in purple, inserted bases are shown in purple, deleted bases are replaced by a dash, and sequence gap length is shown between parentheses. Abbreviations: LRR, leucine-rich repeat; WT, wild-type; PAM, protospacer adjacent motif; UTR, untranslated region.

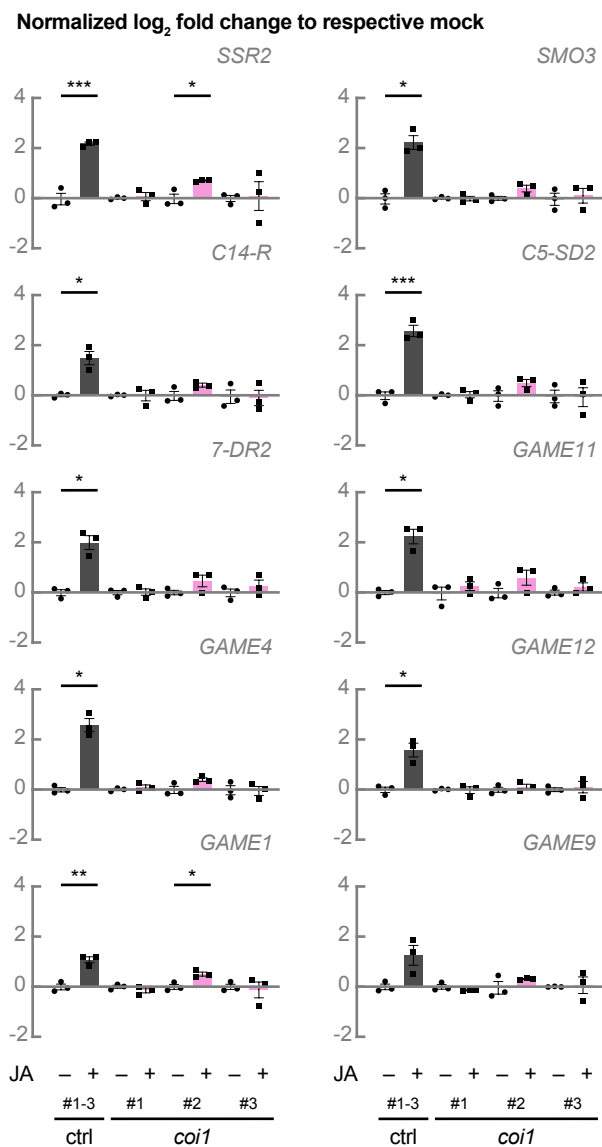

**Supplemental Figure 9.** SGA biosynthesis gene expression is no longer JA inducible in *coi1* lines. Alternative representation of relative expression of cholesterologenesis genes, SGA biosynthesis genes, and *GAME9* shown in Figure 9. Control hairy root lines expressing *pCaMV35S::GUS* (grey bars) and *coi1* lines (pink bars) were treated for 24 h with 50  $\mu$ M of JA or an equal amount of ethanol. For control samples, cDNA of three biological replicates was pooled per independent line and treatment. Bars represent mean log<sub>2</sub>-transformed fold changes relative to the mean of the respective mock-treated line. Error bars denote standard error (n = 3). Individual mock- (●) and JA-treated (■) values are shown. Statistical significance was determined by unpaired Student's *t*-tests (\*, P<0.05; \*\*, P<0.01; \*\*\*, P<0.001; \*\*\*\*, P<0.0001). Abbreviations: *SSR2*, *STEROL SIDE CHAIN REDUCTASE 2*; *SMO3*, *C-4 STEROL METHYL OXIDASE 3*; *C14-R*, *STEROL C-14 REDUCTASE*; *7-DR2*, *7-DEHYDROCHOLESTEROL REDUCTASE 2*; *GUS*,  $\beta$ -glucuronidase.

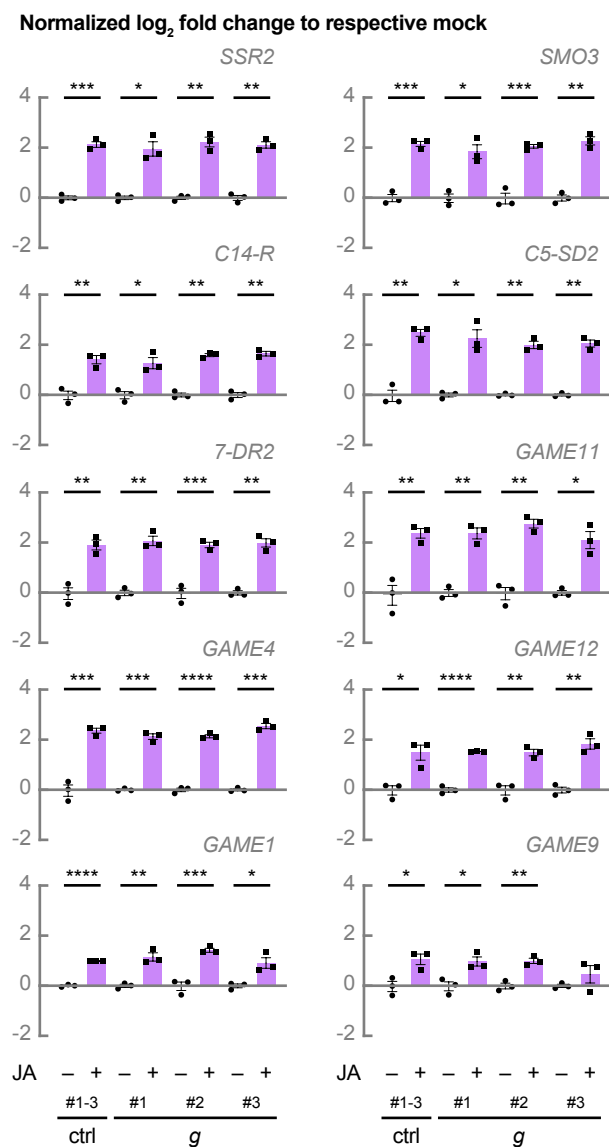

**Supplemental Figure 10.** JA inducibility of *C5-SD2* expression is not affected in G-box (*g*) mutant lines. Alternative representation of relative expression of cholesterologenesis genes, SGA biosynthesis genes, and *GAME9* shown in Figure 11. Control hairy root lines expressing *pCaMV35S::GUS* (grey bars) and *g* lines (purple bars) were treated for 24 h with 50  $\mu$ M of JA or an equal amount of ethanol. For control samples, cDNA of three biological replicates was pooled per independent line and treatment. Bars represent mean log<sub>2</sub>-transformed fold changes relative to the mean of the respective mock-treated line. Error bars denote standard error ( $n = 3$ ). Individual mock- (●) and JA-treated (■) values are shown. Statistical significance was determined by unpaired Student's *t*-tests (\*,  $P < 0.05$ ; \*\*,  $P < 0.01$ ; \*\*\*,  $P < 0.001$ ; \*\*\*\*,  $P < 0.0001$ ). Abbreviations: *SSR2*, *STEROL SIDE CHAIN REDUCTASE 2*; *SMO3*, *C-4 STEROL METHYL OXIDASE 3*; *C14-R*, *STEROL C-14 REDUCTASE*; *7-DR2*, *7-DEHYDROCHOLESTEROL REDUCTASE 2*; *GUS*,  $\beta$ -glucuronidase.

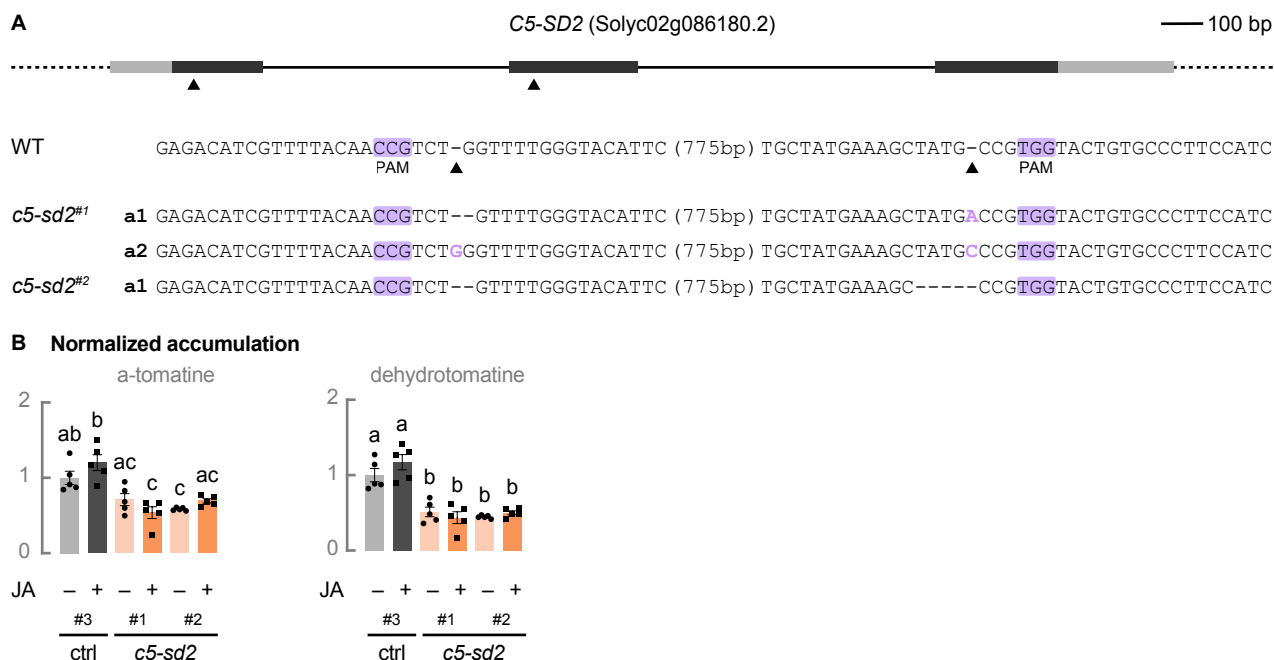

**Supplemental Figure 11.** Reduced SGA levels in *c5-sd2* lines. (A) Schematic representation of *C5-SD2* with location of the CRISPR-Cas9 cleavage sites and *c5-sd2* mutant sequences. Dark grey boxes represent exons, solid lines introns, and light grey boxes UTRs. Cas9 cleavage sites for guide RNAs are indicated with arrowheads. Allele sequences of two independent *c5-sd2* lines are shown. PAMs are marked in purple, inserted bases are shown in purple, deleted bases are replaced by a dash, and sequence gap length is shown between parentheses. (B) Relative accumulation of  $\alpha$ -tomatine and dehydrotomatine analyzed by LC-MS. Control hairy root lines expressing *pCaMV35S::GUS* (grey bars) and *c5-sd2* lines (orange bars) were treated for 24 h with 50  $\mu$ M of JA or an equal amount of ethanol. Bars represent mean fold changes relative to the mean of the mock-treated control. Error bars denote standard error (n=5). Individual mock- (●) and JA-treated (■) values are shown. Statistical significance was determined by ANOVA followed by Tukey post-hoc analysis (P<0.05; indicated by different letters). Abbreviations: WT, wild-type; PAM, protospacer adjacent motif; UTR, untranslated region; *GUS*,  $\beta$ -glucuronidase.

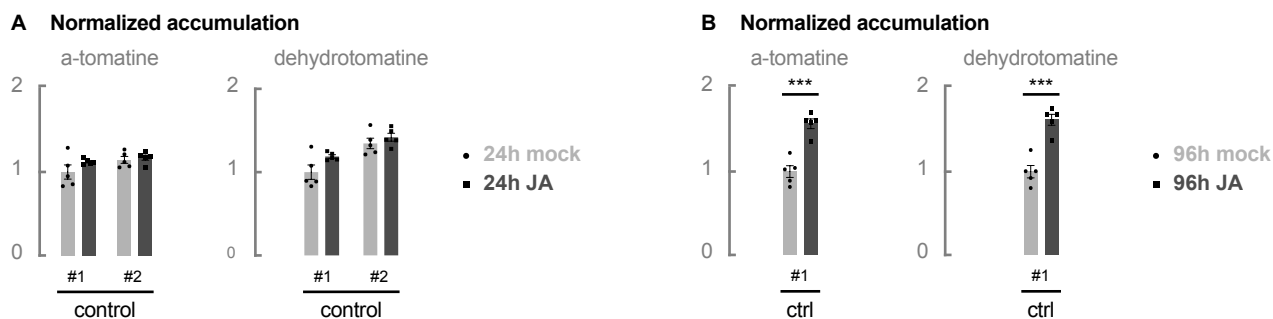

**Supplemental Figure 12.** Limited SGA induction upon 96 h of JA treatment. Relative accumulation of  $\alpha$ -tomatine and dehydrotomatine analyzed by LC-MS. Control hairy root lines expressing *pCaMV35S::GUS* were treated for 24 h (A) or 96 h (B) with 50  $\mu$ M of JA or an equal amount of ethanol. Bars represent mean fold changes relative to the mean of the leftmost mock-treated control. Error bars denote standard error (n=5). Individual mock- (●) and JA-treated (■) values are shown. Statistical significance was determined by unpaired Student's *t*-tests (\*,  $P < 0.05$ ; \*\*,  $P < 0.01$ ; \*\*\*,  $P < 0.001$ ; \*\*\*\*,  $P < 0.0001$ ). Abbreviations: *GUS*,  $\beta$ -glucuronidase.





```

AT1G32640 (AtMYC2)          399 MV-L--N-E-K-L-S-F--G---D---K---G---G---S-D-H-S-D-L-E-A-S-V-V-K-E---V-A-V-E---K-L-F---K-R
AT5G46760 (AtMYC3)          351 SV--S-G-S-N-N-E-G-M-L-S-F--G---T---G---S---G---N---D---S-D-H-S-D-L-E-A-S-V-V-K-E---V-A-V-E---P-E-K-K-P---R-K-R
AT4G17880 (AtMYC4)          355 F-V--S---N-N-E-E-G-M-L-S-F-T-S---L-P-S---G---C---P---S-D-H-S-D-L-E-A-S-V-V-K-E---S-N-R-V-V-E---P-E-K-K-P---R-K-R
AT5G46830 (AtMYC5)          304 ---S---Q---Q---N-V-V-P-H-A---V-M-E---P---R-K-E---K-R
CAN.G298.8
CAN.G1216.16
PGSC0003DMG400017535 (StJAMYC2)
PGSC0003DMG 400001161 (StJAMYC10)
Solyc08g005050.2 (SlMYC1)
Solyc08g076930.1.1 (SlMYC2)
390 LG--S-RG--N-N-E-E-G-M-L-S-F-V-S-G-T-L-P-N-S---G---I-M-E---K-S---G-G-G---G---D---S-D-H-S-D-L-E-A-S-V-V-K-E---V-A-V-E---P-E-K-K-P---R-K-R
438 AT--S-RG--S-N-E-E-G-M-L-S-F-V-S-G-T-L-P-N-S---G---I-M-E---K-S---G-G-G---G---D---S-D-H-S-D-L-E-A-S-V-V-K-E---V-A-V-E---P-E-K-K-P---R-K-R
423 PA--S-RG--S-N-E-E-G-M-L-S-F-V-S-G-T-L-P-A-A---E-A-M-K-S---S-G-G-V---G---D---S-D-H-S-D-L-E-A-S-V-V-K-E---S-S-R-V-V-E---P-E-K-K-P---R-K-R
422 PA--S-RG--S-N-E-E-G-M-L-S-F-V-S-G-T-L-P-A-A---E-A-M-K-S---S-G-G-V---G---D---S-D-H-S-D-L-E-A-S-V-V-K-E---S-S-R-V-V-E---P-E-K-K-P---R-K-R
413 PA--S-RG--S-N-E-E-G-M-L-S-F-V-S-G-T-L-P-N-S---G---I-M-E---K-S---G-G-G---G---D---S-D-H-S-D-L-E-A-S-V-V-K-E---S-S-R-V-V-E---P-E-K-K-P---R-K-R
412 PA--S-RG--S-N-E-E-G-M-L-S-F-V-S-G-T-L-P-N-S---G---I-M-E---K-S---G-G-G---G---D---S-D-H-S-D-L-E-A-S-V-V-K-E---S-S-R-V-V-E---P-E-K-K-P---R-K-R
398 PA--P-S-RG--N-E-E-G-M-L-S-F-V-S-G-T-L-P-N-S---G---I-M-E---K-S---G-G-G---G---D---S-D-H-S-D-L-E-A-S-V-V-K-E---S-S-R-V-V-E---P-E-K-K-P---R-K-R
426 PA--S-RG--S-N-E-E-G-M-L-S-F-V-S-G-T-L-P-N-S---G---I-M-E---K-S---G-G-G---G---D---S-D-H-S-D-L-E-A-S-V-V-K-E---V-A-V-E---P-E-K-K-P---R-K-R
AT4G37850 (AtbHLH25)        108 P-Y-L---N---S---E---S---E---P---S---K---S---G-G-G---G---D---S-D-H-S-D-L-E-A-S-V-V-K-E---L-E-A---Q---V---Q---H-Q-S-D-E-F-N-R-E
    
```

bHLH

```

AT1G32640 (AtMYC2)          440 G--R--K-P--A-N-G-R-E-E-P-L-N---H---V-E-A-E-R-Q-R-R-E-K-L-N-Q-R-F-Y-A-L-R-A-V-V-P-N-V-S-K-M-D-K-A-S-L-L-G-D-A---I-A-Y-I-N-E-L-R---S-K-L---Q---A-E-S
AT5G46760 (AtMYC3)          403 G--R--K-P--A-N-G-R-E-E-P-L-N---H---V-E-A-E-R-Q-R-R-E-K-L-N-Q-R-F-Y-S-L-R-A-V-V-P-N-V-S-K-M-D-K-A-S-L-L-G-D-A---I-S-Y-I-N-E-L-R---S-K-L---Q---A-E-S
AT4G17880 (AtMYC4)          404 G--R--K-P--A-N-G-R-E-E-P-L-N---H---V-E-A-E-R-Q-R-R-E-K-L-N-Q-R-F-Y-S-L-R-A-V-V-P-N-V-S-K-M-D-K-A-S-L-L-G-D-A---I-S-Y-I-S-L-R---S-K-L---Q---A-E-S
AT5G46830 (AtMYC5)          331 G--R--K-P--A-N-G-R-E-E-P-L-N---H---V-E-A-E-R-Q-R-R-E-K-L-N-Q-R-F-Y-A-L-R-A-V-V-P-N-V-S-K-M-D-K-A-S-L-L-G-D-A---I-C-V-I-N-E-L-R---S-K-L---H-N-E-S
CAN.G298.8
CAN.G1216.16
PGSC0003DMG400017535 (StJAMYC2)
PGSC0003DMG 400001161 (StJAMYC10)
Solyc08g005050.2 (SlMYC1)
Solyc08g076930.1.1 (SlMYC2)
413 C--R--K-P--A-N-G-R-E-E-P-L-N---H---V-E-A-E-R-Q-R-R-E-K-L-N-Q-R-F-Y-A-L-R-A-V-V-P-N-V-S-K-M-D-K-A-S-L-L-G-D-A---I-A-Y-I-N-E-L-R---S-K-L---Q---A-E-S
445 C--R--K-P--A-N-G-R-E-E-P-L-N---H---V-E-A-E-R-Q-R-R-E-K-L-N-Q-R-F-Y-A-L-R-A-V-V-P-N-V-S-K-M-D-K-A-S-L-L-G-D-A---I-A-Y-I-N-E-L-R---S-K-L---Q---A-E-S
501 C--R--K-P--A-N-G-R-E-E-P-L-N---H---V-E-A-E-R-Q-R-R-E-K-L-N-Q-R-F-Y-A-L-R-A-V-V-P-N-V-S-K-M-D-K-A-S-L-L-G-D-A---I-S-Y-I-N-E-L-R---S-K-L---Q---A-E-S
489 C--R--K-P--A-N-G-R-E-E-P-L-N---H---V-E-A-E-R-Q-R-R-E-K-L-N-Q-R-F-Y-A-L-R-A-V-V-P-N-V-S-K-M-D-K-A-S-L-L-G-D-A---I-S-Y-I-N-E-L-R---S-K-L---Q---A-E-S
487 C--R--K-P--A-N-G-R-E-E-P-L-N---H---V-E-A-E-R-Q-R-R-E-K-L-N-Q-R-F-Y-A-L-R-A-V-V-P-N-V-S-K-M-D-K-A-S-L-L-G-D-A---I-S-Y-I-N-E-L-R---S-K-L---Q---A-E-S
475 C--R--K-P--A-N-G-R-E-E-P-L-N---H---V-E-A-E-R-Q-R-R-E-K-L-N-Q-R-F-Y-A-L-R-A-V-V-P-N-V-S-K-M-D-K-A-S-L-L-G-D-A---I-A-I-N-E-L-R---S-K-L---Q---A-E-S
474 C--R--K-P--A-N-G-R-E-E-P-L-N---H---V-E-A-E-R-Q-R-R-E-K-L-N-Q-R-F-Y-A-L-R-A-V-V-P-N-V-S-K-M-D-K-A-S-L-L-G-D-A---I-A-I-N-E-L-R---S-K-L---Q---A-E-S
461 C--R--K-P--A-N-G-R-E-E-P-L-N---H---V-E-A-E-R-Q-R-R-E-K-L-N-Q-R-F-Y-A-L-R-A-V-V-P-N-V-S-K-M-D-K-A-S-L-L-G-D-A---I-S-Y-I-N-E-L-R---S-K-L---Q---A-E-S
488 G--R--K-P--A-N-G-R-E-E-P-L-N---H---V-E-A-E-R-Q-R-R-E-K-L-N-Q-R-F-Y-A-L-R-A-V-V-P-N-V-S-K-M-D-K-A-S-L-L-G-D-A---I-S-Y-I-N-E-L-R---S-K-L---Q---A-E-S
AT4G37850 (AtbHLH25)        136 P-K-R-A-C-L-F-S---P---N-Q-S---N-A-Q-D-E---H---A-E-R-K-R-R-E-K-L-N-Q-R-F-Y-A-L-R-A-V-V-P-N-V-S-K-M-D-K-A-S-L-L-G-D-A-L-K-H---K-Y---E---S-V-G-E---E---E---E
    
```

bHLH

```

AT1G32640 (AtMYC2)          507 R-L-Q---E---K---K---E---E---V---K---D-L-A---G---K---A---S---A---S---E---G---D---S---S---C---S---S---K---P---V---G---I---I---V---K-I-I---G-W-D
470 D-R--E---L---Q---K---K---L---G---S---K---E---N-N-G---K-G-C-G-S---A-K-E-R-K-S-S-N---Q-E---S---I---A---S---S-L---I---M---I-D-V-K-I-I---G-W-D
471 D-R--E---L---Q---K---K---L---G---S---K---E---A---G-N-A---S---S-V---D-R-K---C-L-N---C---S---S---V---S---I---M---I-D-V-K-I-I---G-W-D
398 K-H-A-I---E---E---F-N-E-L---K---E-L-A---G-Q---S---N---A---I---S---S-V-C---K-Y-E---K---A-S---E---E---K---I---V-K-I---E-S-D
565 D-R--E---L---K-S-Q-I-E-D-L-K---E-L-A---N---K-G-S---S---R-P---G-P---P-P---N---O-D-L-K-M-S-S-H-T---G---G-K-I---V-D-M---D-I-D-V-K-I-I---G-W-D
497 N-I--E---L---N---O-I-E-Y-L-K---E-L-A---N---K-G-S---S---N-Y-F---P-S-P-P---Q-N---O-D-L---K---I---V-D-M---D-I-D-V-K-I-I---G-W-D
470 D-R--E---L---K-S-Q-I-E-D-L-K---E-L-A---N---K-G-S---S---P---P---P-P---N---O-D-L-K-M-S-S-H-T---G---G-K-I---V-D-M---D-I-D-V-K-I-I---G-W-D
480 D-R--E---L---S-Q-I-E-S-L-K---E-L-A---N---K-G-S---S---N-Y-S---S---P-S---P-P---N---O-D-L---K---I---V-D-M---D-I-D-V-K-I-I---G-W-D
512 D-R--E---L---S-Q-I-E-S-L-K---E-L-A---N---K-G-S---S---N-Y-S---S---P-S---P-P---N---O-D-L---K---I---V-D-M---D-I-D-V-K-I-I---G-W-D
568 D-R--E---L---K-S-Q-I-E-D-L-K---E-L-A---N---K-G-S---S---P---P---P-P---N---O-D-L-K-M-S-S-H-T---G---G-K-I---V-D-M---D-I-D-V-K-I-I---G-W-D
556 D-R--E---L---K-S-Q-I-E-D-L-K---E-L-D---S---R-D---S---R-P---G-P---P-P---N---O-D-L-K-M-S-S-H-T---G---S-K-I---V-D-M---D-I-D-V-K-I-I---G-W-D
554 D-R--E---L---K-S-Q-I-E-D-L-K---E-L-V---S---R-D---S---R-P---G-P---P-P---S---N---H---K-M-S-S-H-T---G---S-K-I---V-D-M---D-I-D-V-K-I-I---G-W-D
542 D-R--E---L---N-O-I-E-S-L-N---E-L-A---N---K-G-S---S---N-Y-T---G-P---P-P---N---O-D-L---K---I---V-D-M---D-I-D-V-K-I-I---G-W-D
541 D-R--E---L---N-O-I-E-S-L-N---E-L-A---N---K-G-S---S---N-Y-T---G-P---P-P---N---O-D-L---K---I---V-D-M---D-I-D-V-K-I-I---G-W-D
528 E--E--E---L---K-S-Q-E-S-L-K-R---E-L-A---N---K-G-S---S---N-Y-S---G-P-S-P-P---N---O-D-L---K---I---V-D-M---D-I-D-V-K-I-I---G-W-D
555 D-R--E---L---K-S-Q-E-S-L-K-R---E-L-A---S---K-E---S---H-S---G-P---P-P---K---O-D-L-T-M-S-S-H-T---G---S-K-I---V-D-M---D-I-D-V-K-I-I---G-W-D
AT4G37850 (AtbHLH25)        207 Q-K-K---E---E---R---E-S-E---V---L-V---K-K---S---L-L-I-D---D-N---N---C-S-F-S---S-S---C-E-D-G-F-S-D---V---D---P-E-L-T-V-E---F---S---D
    
```

```

AT1G32640 (AtMYC2)          557 --A-M-I-R-E-S-S-H---N---H-P-A-A-R-L-M-A---L-K-E---L-D-V---N-H-A-S---S-V-N---D-I---M-I---Q-Q-A-T-V-K-M-G-R-Y-T-Q-E---Q---R---I
AT5G46760 (AtMYC3)          523 --V-M-I-R-Q-C-K---R-D---H-P-A-R-F-E-A---L-K-E---L-D-L-D-V---N-H-A-S---S-V-N---D-I---M-I---Q-Q-A-T-V-K-M-G-S-R-F-N-E---Q---R---I
AT4G17880 (AtMYC4)          520 --A-M-I-R-Q-C-S---N---H-P-A-R-F-E-A---L-K-E---L-D-L-D-V---N-H-A-S---S-V-N---D-I---M-I---Q-Q-A-T-V-K-M-G-N-O-F---Q---Q---R---I
AT5G46830 (AtMYC5)          444 --D-A-N-I-E-S---E---H-P-A-A-R-L-M-A---L-K-E---L-D-L-D-V---N-H-A-S---S-V-N---D-I---M-I---Q-Q-A-T-V-K-M-G-R-Y-T-Q-E---Q---R---I
CAN.G298.8
CAN.G1216.16
PGSC0003DMG400017535 (StJAMYC2)
PGSC0003DMG 400001161 (StJAMYC10)
Solyc08g005050.2 (SlMYC1)
Solyc08g076930.1.1 (SlMYC2)
529 --A-M-I-R-Q-C-S---K-N---H-P-A-A-R-L-M-A---L-K-E---L-D-L-D-V---H-H-A-S-V-S-V-N---D-I---M-I---Q-Q-A-T-V-K-M-G-S-R-Y-T-Q-E---Q---R---I
561 --A-M-I-R-Q-C-S---K-N---H-P-A-A-R-L-M-A---L-K-E---L-D-L-D-V---H-H-A-S-V-S-V-N---D-I---M-I---Q-Q-A-T-V-K-M-G-S-R-Y-T-Q-E---Q---R---I
620 --A-M-I-R-Q-C-N-K---K-N---H-P-A-A-R-L-M-A---L-K-E---L-D-L-D-V---H-H-A-S-V-S-V-N---D-I---M-I---Q-Q-A-T-V-K-M-G-S-R-Y-T-Q-E---Q---R---I
612 --A-M-I-R-Q-C-N-K---K-N---H-P-A-A-R-L-M-A---L-K-E---L-D-L-D-V---H-H-A-S-V-S-V-N---D-I---M-I---Q-Q-A-T-V-K-M-G-S-R-Y-T-Q-E---Q---R---I
610 --A-M-I-R-Q-C-N-K---K-N---H-P-A-A-R-L-M-A---L-K-E---L-D-L-D-V---H-H-A-S-V-S-V-N---D-I---M-I---Q-Q-A-T-V-K-M-G-S-R-Y-T-Q-E---Q---R---I
590 --A-M-I-R-Q-S-N-K---K-N---H-P-A-A-R-L-M-A---L-K-E---L-D-L-D-V---H-H-A-S-V-S-V-N---D-I---M-I---Q-Q-A-T-V-K-M-G-S-R-Y-T-Q-E---Q---R---I
589 --A-M-I-R-Q-S-N-K---K-N---H-P-A-A-R-L-M-A---L-K-E---L-D-L-D-V---H-H-A-S-V-S-V-N---D-I---M-I---Q-Q-A-T-V-K-M-G-S-R-Y-T-Q-E---Q---R---I
576 --A-M-I-R-Q-S-N-K---K-N---H-P-A-A-R-L-M-A---L-K-E---L-D-L-D-V---H-H-A-S-V-S-V-N---D-I---M-I---Q-Q-A-T-V-K-M-G-S-R-Y-T-Q-E---Q---R---I
611 --A-M-I-R-Q-C-N-K---K-N---H-P-A-A-R-L-M-A---L-K-E---L-D-L-D-V---H-H-A-S-V-S-V-N---D-I---M-I---Q-Q-A-T-V-K-M-G-S-R-Y-T-Q-E---Q---R---I
AT4G37850 (AtbHLH25)        256 E-D-V-I-I-I-I-C-E-H-Q-R-E---H---I-A---M---E-L---E-R-L-H-I-L---T-N---S---S-V-N---F-G-P-T-L-T-I-L-K-K-E-S-D-F-M---H---H-M---N-V-K-S-R-E-S
    
```



```
AT1G32640 (AtMYC2)          616 S L S K I I -----
AT5G46760 (AtMYC3)          583 A L L K R G E N ---Y
AT4G17880 (AtMYC4)          580 A L L E K Y G S P ---
AT5G46830 (AtMYC5)          506 --- L T S R - S -----
CAN.G298.8                   681 A L L T S R - T A E ---R
CAN.G1216.16                 607 A L L T S R - T A E ---R
PGSC0003DMG400017535 (StJAMYC2) 681 A L L T S R - T A E P L E S R
PGSC0003DMG 400001161 (StJAMYC10) 589 A L L T S R - T A E ---R
Solyc08g005050.2 (SlMYC1)     621 A L L T S R - T A E ---R
Solyc08g076930.1.1 (SlMYC2)   680 A L L T S R - T A E ---H
NF_001312960.1 (NtMYC1a)      672 A L L T S R - T A E ---R
NF_001313001.1 (NtMYC1b)      670 A L L T S R - T A E ---R
NF_001312938.1 (NtMYC2a)      650 S L L T S R - T A E ---R
NF_001311866.1 (NtMYC2b)      649 S L L T S R - T A E ---R
Peaxi162Scf00045g00011       636 A L L T S R - T A E ---R
Peaxi162Scf00460g00011       671 A L L T S R - T A E ---R
AT4G37850 (AtbHLH25)         323 A L L S N E F I -----
```

**Supplemental Figure 13.** Protein alignment generated by MUSCLE used for the phylogenetic tree in Figure 3A.

**Supplemental Table 1.** Oligonucleotides used in this study

| Oligonucleotide                                                            | Sequence (5'-3')                                            | Orientation | Description                                  | SolycID          |
|----------------------------------------------------------------------------|-------------------------------------------------------------|-------------|----------------------------------------------|------------------|
| Oligonucleotides for transient expression assay constructs:                |                                                             |             |                                              |                  |
| COMBI3834                                                                  | GGGGACAAGTTTGTACAAAAAAGCAGGCTCCATGACGGACTATAGATTATG         | Forward     | amplification of <i>MYC1</i>                 | Solyc08g005050.2 |
| COMBI3835                                                                  | GGGGACCACTTTGTACAAGAAAGCTGGGTTTCATCGCGATTCAGCAATTT          | Reverse     |                                              |                  |
| COMBI4483                                                                  | GGGGACAAGTTTGTACAAAAAAGCAGGCTTAAGGAAAATAACAACGGAGAGAG       | Forward     | amplification of <i>C5-SD2</i> promoter      | Solyc02g086180.2 |
| COMBI4484                                                                  | GGGGACAAGTTTGTACAAAAAAGCAGGCTTATAAATAAATAAATAAATTCTC        | Reverse     | from <i>g</i> lines                          |                  |
| Oligonucleotides for CRISPR-Cas9 constructs:                               |                                                             |             |                                              |                  |
| COMBI6291                                                                  | ATTGAGCTCACACACAACACGTG                                     | Forward     | G-box (in p <i>C5-SD2</i> ) gRNA target site | Solyc02g086180.2 |
| COMBI6292                                                                  | AAACCACGTGTTGTGTGGTGTGAGCT                                  | Reverse     |                                              |                  |
| LAPAU3201                                                                  | ATTGGTTCACCGGAGTCGGACGAT                                    | Forward     | <i>MYC1</i> gRNA target site 1               | Solyc08g005050.2 |
| LAPAU3202                                                                  | AAACATCGTCCGACTCCGGTGAAC                                    | Reverse     |                                              |                  |
| LAPAU3203                                                                  | ATTGTCCGGTGTACAAGCTTCCGC                                    | Forward     | <i>MYC1</i> gRNA target site 2               | Solyc08g005050.2 |
| LAPAU3204                                                                  | AAACGCGGAAGCTTGACACCGGA                                     | Reverse     |                                              |                  |
| LAPAU3195                                                                  | ATTGTTTATCCGCAGCTGCGACTG                                    | Forward     | <i>MYC2</i> gRNA target site 1               | Solyc08g076930.1 |
| LAPAU3196                                                                  | AAACCAGTCGCAGCTGCGGATAAA                                    | Reverse     |                                              |                  |
| LAPAU3197                                                                  | ATTGACCGCATCATCCGTTCCGGG                                    | Forward     | <i>MYC2</i> gRNA target site 2               | Solyc08g076930.1 |
| LAPAU3198                                                                  | AAACCCGGAACGGATGATGCGGT                                     | Reverse     |                                              |                  |
| LAPAU3207                                                                  | ATTGTGATAGAGACGCGGTATCGT                                    | Forward     | <i>COI1</i> gRNA target site 1               | Solyc05g052620.2 |
| LAPAU3208                                                                  | AAACACGATACCGCTCTATCA                                       | Reverse     |                                              |                  |
| LAPAU3209                                                                  | ATTGAAATTAACATAGCAGCTCT                                     | Forward     | <i>COI1</i> gRNA target site 2               | Solyc05g052620.2 |
| LAPAU3210                                                                  | AAACAGAGCTGCTATGTTAATTT                                     | Reverse     |                                              |                  |
| COMBI6283                                                                  | ATTGAGAATGTACCCAAAACCAGA                                    | Forward     | <i>C5-SD2</i> gRNA target site 1             | Solyc02g086180.2 |
| COMBI6284                                                                  | AAACTCTGGTTTTGGGTACATTCT                                    | Reverse     |                                              |                  |
| COMBI6285                                                                  | ATTGTTGCTATGAAAGCTATGCCG                                    | Forward     | <i>C5-SD2</i> gRNA target site 2             | Solyc02g086180.2 |
| COMBI6286                                                                  | AAACCGGCATAGCTTTCATAGCAA                                    | Reverse     |                                              |                  |
| attB5_AtU6gRNA                                                             | GGGGACAACCTTTGTATACAAAAGTTGTACTTTTTTTCTTCTTCTTCGTTTCATACAG  | Forward     | gRNA module with attB5 and attB4             | –                |
| attB4_AtU6gRNA                                                             | GGGGACAACCTTTGTATAGAAAAGTTGGGTGCTAGAAAAAAGCACCAGACTCGG      | Reverse     | flanking sites                               |                  |
| attB4r_AtU6gRNA                                                            | GGGGACAACCTTTTCTATACAAAAGTTGTACTTTTTTTCTTCTTCTTCGTTTCATACAG | Forward     | gRNA module with attB4r and attB3r           | –                |
| attB3r_AtU6gRNA                                                            | GGGGACAACCTTTATTATACAAAAGTTGTCTAGAAAAAAGCACCAGACTCGG        | Reverse     | flanking sites                               |                  |
| attB3_AtU6gRNA                                                             | GGGGACAACCTTTGTATAATAAAGTTGTACTTTTTTTCTTCTTCTTCGTTTCATACAG  | Forward     | gRNA module with attB3 and attB2             | –                |
| attB2_AtU6gRNA                                                             | GGGGACCACTTTGTACAAGAAAGCTGGGTTCTAGAAAAAAGCACCAGACTCGG       | Reverse     | flanking sites                               |                  |
| noBbsI_F                                                                   | AGTCTTGCGACTGAGCCTTTCGTTTTATTTGATGCC                        | Forward     | Eliminate <i>BbsI</i> site in pDONR221       | –                |
| noBbsI_R                                                                   | CTCAGTCGCAAGACTGGGCCTTTCGTTTTATCTG                          | Reverse     |                                              |                  |
| Oligonucleotides for the identification of CRISPR-Cas9 hairy root mutants: |                                                             |             |                                              |                  |
| LAPAU3075                                                                  | TCCCTCATCAGATCCACCTC                                        | Forward     | amplification of Cas9                        | –                |
| LAPAU3076                                                                  | CTGAAACCTGAGCCTTCTGG                                        | Reverse     |                                              |                  |
| COMBI6305                                                                  | CCTCCATCTCCGACGGTATACTAGG                                   | Forward     | amplification of G-box (in p <i>C5-SD2</i> ) | Solyc02g086180.2 |
| COMBI6306                                                                  | CTGCAACAAGTGGCTGGTTAGTTC                                    | Reverse     | gRNA target region                           |                  |
| LAPAU3205                                                                  | CTACTCTCATTTCTCACCTAACAAACAAAATCT                           | Forward     | amplification of <i>MYC1</i> gRNA target     | Solyc08g005050.2 |
| LAPAU3206                                                                  | GCCTGGCCCGTTCACAT                                           | Reverse     | region                                       |                  |
| LAPAU3199                                                                  | TGCCACCATGAATTTGTGGA                                        | Forward     | amplification of <i>MYC2</i> gRNA target     | Solyc08g076930.1 |
| LAPAU3200                                                                  | ATCGTCTGAAGCCCGAACC                                         | Reverse     | region                                       |                  |

|                                                        |                            |         |                                            |                  |
|--------------------------------------------------------|----------------------------|---------|--------------------------------------------|------------------|
| LAPAU3211                                              | CTCTCTCCTCCATCTTCTTCAACTG  | Forward | amplification of <i>CO11</i> gRNA target   | Solyc05g052620.2 |
| LAPAU3212                                              | GCAGGAACGAGAAATATGCAGAAGAC | Reverse | region                                     |                  |
| COMBI6287                                              | GTGTTACCGCACTAGCCCCCTC     | Forward | amplification of <i>C5-SD2</i> gRNA target | Solyc02g086180.2 |
| COMBI6288                                              | GGAGGTGGCCTACTGTCAATCAG    | Reverse | region 1                                   |                  |
| COMBI6289                                              | CTGATTGACAGTAGGCCACCTCC    | Forward | amplification of <i>C5-SD2</i> gRNA target | Solyc02g086180.2 |
| COMBI6290                                              | GGTTGCGTGTCCGATTAGCC       | Reverse | region 2                                   |                  |
| Oligonucleotides for gene expression analysis by qPCR: |                            |         |                                            |                  |
| COMBI5428                                              | CCTCCGTTGTGATGTAAGTGG      | Forward | amplification of <i>CAC</i>                | Solyc08g006960.2 |
| COMBI5429                                              | ATTGGTGGAAAGTAACATCATCG    | Reverse |                                            |                  |
| COMBI5416                                              | ATGGAGTTTTGAGTCTTCTGC      | Forward | amplification of <i>TIP41</i>              | Solyc10g049850.1 |
| COMBI5417                                              | GCTGCGTTTCTGGCTTAGG        | Reverse |                                            |                  |
| COMBI5683                                              | GGCCAAATGTCAAGGGTCACT      | Forward | amplification of <i>SSR2</i>               | Solyc02g069490.2 |
| COMBI5684                                              | ACCCGAACCCATTGATCA         | Reverse |                                            |                  |
| COMBI7957                                              | CCCACTTTTGGTTCCTTGTC       | Forward | amplification of <i>SMO3</i>               | Solyc01g091320.2 |
| COMBI7958                                              | GGAAATTCATACCCGCTGTG       | Reverse |                                            |                  |
| COMBI7951                                              | CGTTTGTCCACGTTGCTTGTC      | Forward | amplification of <i>C14-R</i>              | Solyc09g009040.2 |
| COMBI7952                                              | TTGGGTAGTGCGGTACAGTGAG     | Reverse |                                            |                  |
| COMBI6281                                              | TTCGTGGAAGCCTTATGGAC       | Forward | amplification of <i>C5-SD2</i>             | Solyc02g086180.2 |
| COMBI6282                                              | TGGCGGTATGTTGATGGTG        | Reverse |                                            |                  |
| COMBI5669                                              | TCTGCTTGGGCGTTTCTTC        | Forward | amplification of <i>7-DR2</i>              | Solyc06g074090.2 |
| COMBI5670                                              | CCAAACCACCCTGCCTTTTC       | Reverse |                                            |                  |
| COMBI5756                                              | TGTGCAGCCTATTCGCAATG       | Forward | amplification of <i>GAME11</i>             | Solyc07g043420.2 |
| COMBI5757                                              | TTTGTCAACACACGATGTGC       | Reverse |                                            |                  |
| COMBI5673                                              | ACCTGTTGCTCTTATGTCTGTC     | Forward | amplification of <i>GAME4</i>              | Solyc12g006460.1 |
| COMBI5674                                              | CCTCTTGTTCCTCTTTGGCTT      | Reverse |                                            |                  |
| COMBI5677                                              | GCGGAGGGTTCTTATGTCTATG     | Forward | amplification of <i>GAME12</i>             | Solyc12g006470.1 |
| COMBI5678                                              | GCTTCAATAAGACGAGGCTCAC     | Reverse |                                            |                  |
| COMBI5671                                              | TTGCCGGATGTTCCATGATCG      | Forward | amplification of <i>GAME1</i>              | Solyc07g043490.1 |
| COMBI5672                                              | CTAATGAAGAAACAGCGTCTGG     | Reverse |                                            |                  |
| COMBI6976                                              | ACCAAGCCGCTTACAAGATTCGG    | Forward | amplification of <i>GAME9</i>              | Solyc01g090340.2 |
| COMBI6977                                              | TAGGTACGTCCGAGCCAATCAG     | Reverse |                                            |                  |
| COMBI6817                                              | GATTTACCAATCGCGAGACG       | Forward | amplification of <i>JAZ1</i>               | Solyc12g009220.1 |
| COMBI6818                                              | TTGAGCACCTAATCCCAACC       | Reverse |                                            |                  |
| COMBI6946                                              | AGACGCCGATTCCAACGCTTATC    | Forward | amplification of <i>ODC</i>                | Solyc04g082030.1 |
| COMBI6947                                              | TCCGAGTTGAGCTGCTGTTTCG     | Reverse |                                            |                  |
| COMBI7491                                              | AAGGAGGCCGTTGTAGAACCTG     | Forward | amplification of <i>MYC1</i>               | Solyc08g005050.2 |
| COMBI7492                                              | TCCCTTCCATTGGCTGGTTTCC     | Reverse |                                            |                  |
| COMBI5852                                              | TAATGGAAGTGGGCTTCCTG       | Forward | amplification of <i>MYC2</i>               | Solyc08g076930.1 |
| COMBI5853                                              | GCTGCCAATTTCTCAGTTCC       | Reverse |                                            |                  |

**A** *MYC2* (Solyc08g076930.1) — 100 bp

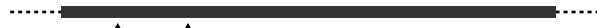

**B Normalized log<sub>2</sub> fold change**

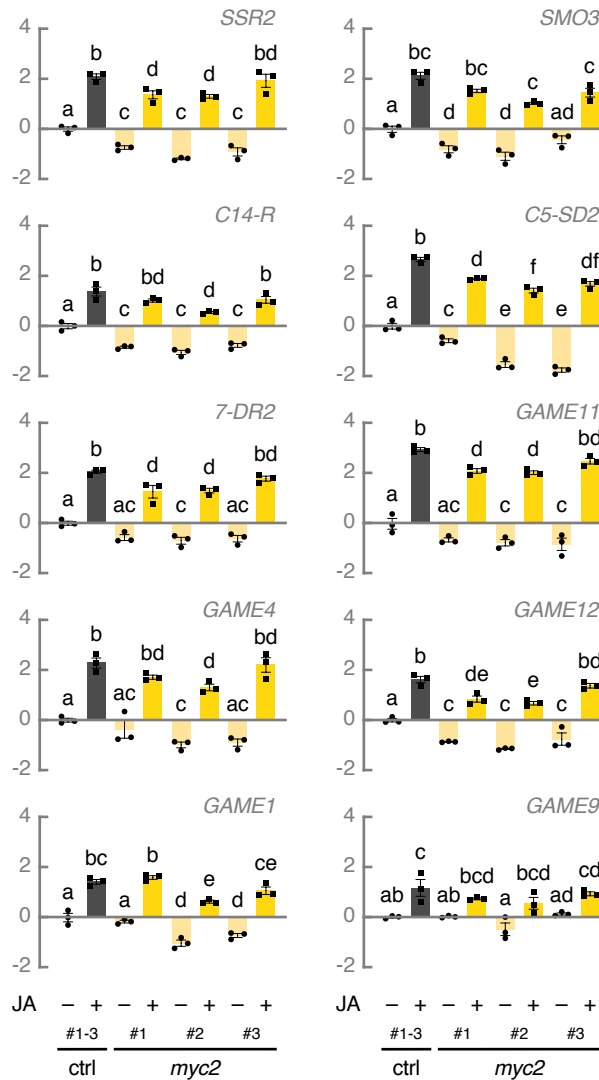

**C Normalized accumulation**

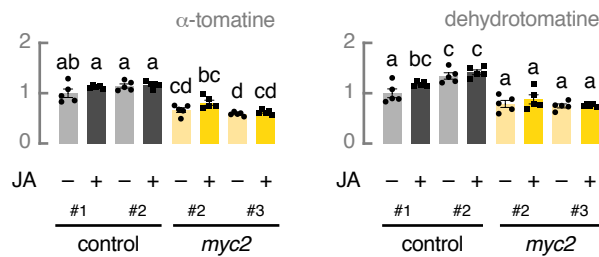

**Figure 1.** MYC2 coordinates constitutive SGA biosynthesis in tomato. (A) Schematic representation of *MYC2* with location of the CRISPR-Cas9 cleavage sites. The dark grey box represents the exon. Cas9 cleavage sites for two guide RNAs are indicated with arrowheads. (B) Relative expression of cholesterologenesis genes, SGA biosynthesis genes, and *GAME9* analyzed by qPCR. Control hairy root lines expressing *pCaMV35S::GUS* (grey bars) and *myc2* lines (yellow bars) were treated for 24 h with 50  $\mu$ M of JA or an equal amount of ethanol. For control samples, cDNA of three biological replicates was pooled per independent line and treatment. Bars represent mean  $\log_2$ -transformed fold changes relative to the mean of three independent mock-treated control lines. Error bars denote standard error (n = 3). Individual mock- (●) and JA-treated (■) values are shown. Statistical significance was determined by ANOVA followed by Tukey post-hoc analysis (P<0.05; indicated by different letters). (C) Relative accumulation of  $\alpha$ -tomatine and dehydrotomatine analyzed by LC-MS. Control hairy root lines expressing *pCaMV35S::GUS* (grey bars) and *myc2* lines (yellow bars) were treated for 24 h with 50  $\mu$ M of JA or an equal amount of ethanol. Bars represent mean fold changes relative to the mean of mock-treated control<sup>#1</sup>. Error bars denote standard error (n=5). Individual mock- (●) and JA-treated (■) values are shown. Statistical significance was determined by ANOVA followed by Tukey post-hoc analysis (P<0.05; indicated by different letters). Abbreviations: *SSR2*, *STEROL SIDE CHAIN REDUCTASE 2*; *SMO3*, *C-4 STEROL METHYL OXIDASE 3*; *C14-R*, *STEROL C-14 REDUCTASE*; *7-DR2*, *7-DEHYDROCHOLESTEROL REDUCTASE 2*; *GUS*,  $\beta$ -glucuronidase.

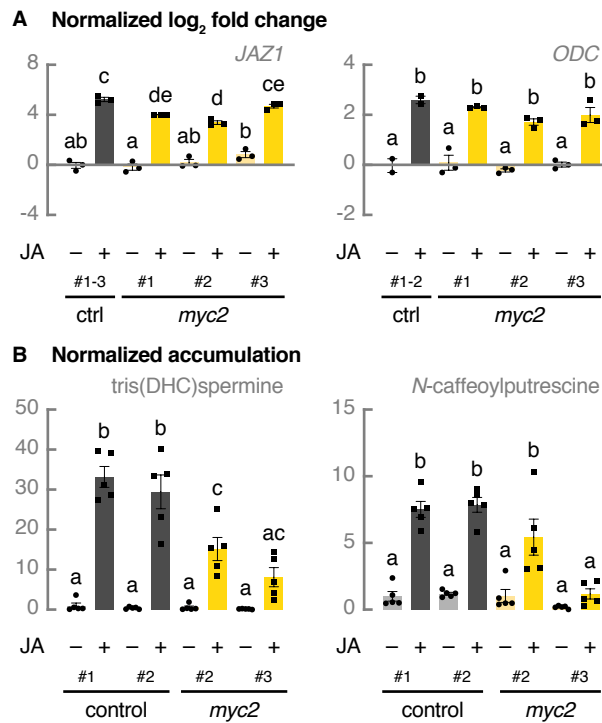

**Figure 2.** MYC2 helps ensure JA-induced polyamine production in tomato. (A) Relative expression of *JAZ1* and *ODC* analyzed by qPCR. Control hairy root lines expressing *pCaMV35S::GUS* (grey bars) and *myc2* lines (yellow bars) were treated for 24 h with 50  $\mu$ M of JA or an equal amount of ethanol. For control samples, cDNA of three biological replicates was pooled per independent line and treatment. Bars represent mean log<sub>2</sub>-transformed fold changes relative to the mean of three independent mock-treated control lines. Error bars denote standard error (n = 3). Individual mock- (●) and JA-treated (■) values are shown. Statistical significance was determined by ANOVA followed by Tukey post-hoc analysis (P<0.05; indicated by different letters). (B) Relative accumulation of tris(dihydrocaffeoyl)spermine and *N*-caffeoylputrescine analyzed by LC-MS. Control hairy root lines expressing *pCaMV35S::GUS* (grey bars) and *myc2* lines (yellow bars) were treated for 24 h with 50  $\mu$ M of JA or an equal amount of ethanol. Bars represent mean fold changes relative to the mean of mock-treated control<sup>#1</sup>. Error bars denote standard error (n=5). Individual mock- (●) and JA-treated (■) values are shown. Statistical significance was determined by ANOVA followed by Tukey post-hoc analysis (P<0.05; indicated by different letters). Abbreviations: DHC, dihydrocaffeoyl; *GUS*,  $\beta$ -glucuronidase.

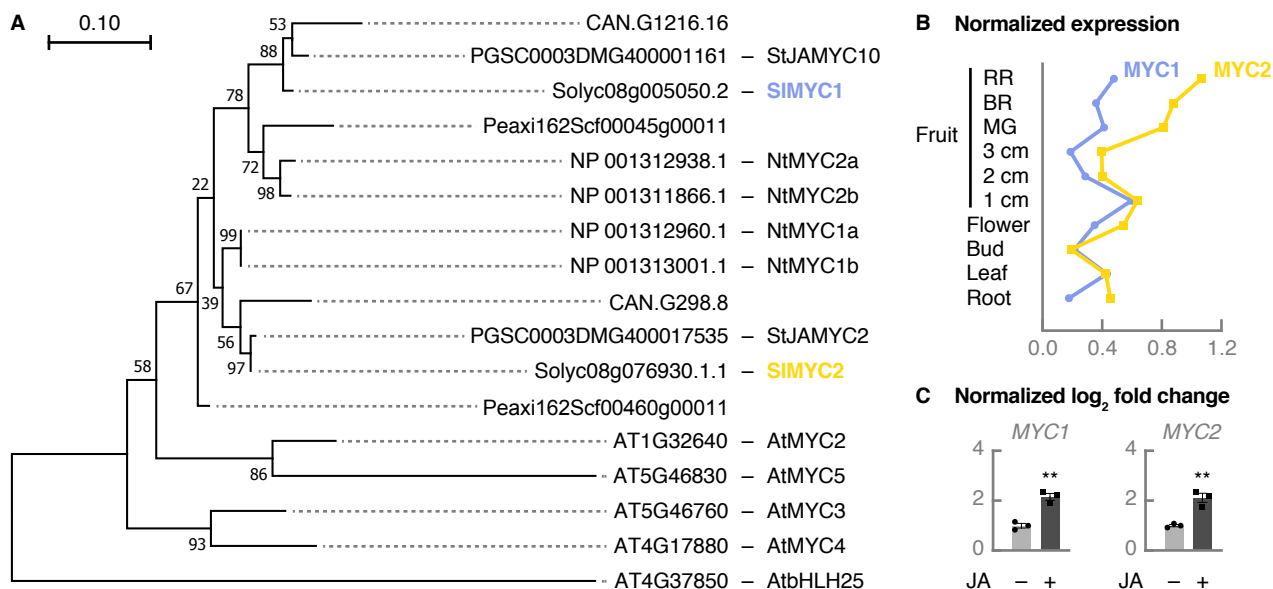

**Figure 3.** Tomato has two clade IIIe bHLH family members. (A) Phylogenetic analysis of *Arabidopsis thaliana* and Solanaceae bHLH clade IIIe members using MUSCLE and the Maximum Likelihood method. The tree is drawn to scale, with branch lengths measured in the number of substitutions per site. The analysis involved amino acid sequences from *Capsicum annuum* (CAN.G1216.16, CAN.G298.8), *Solanum tuberosum* (PGSC0003DMG400001161, PGSC0003DMG400017535), *S. lycopersicum* (Solyc08g005050.2, Solyc08g076930.1.1), *Petunia axillaris* (Peaxi162Scf00045g00011, Peaxi162Scf00460g00011), *Nicotiana tabacum* (NP\_001312938.1, NP\_001311866.1, NP\_001312960.1, NP\_001313001.1), and *A. thaliana* (AT1G32640, AT5G46830, AT5G46760, AT4G17880). The *A. thaliana* bHLH clade IVa member bHLH25 (AT4G37850) was used to root the tree. Numbers shown are bootstrap values in percentages (based on 1,000 replicates). Evolutionary analyses were conducted in MEGA7 (Kumar et al., 2016). (B) Normalized *MYC1* and *MYC2* expression profiles in different organs and developmental stages (cultivar Heinz 1706). Expression data were obtained from TomExpress (Zouine et al., 2017). (C) Relative expression of *MYC1* and *MYC2* analyzed by qPCR. Control hairy root lines expressing *pCaMV35S::GUS* were treated for 24 h with 50  $\mu$ M of JA or an equal amount of ethanol. The cDNA of three biological replicates was pooled per independent line and treatment. Bars represent mean log<sub>2</sub>-transformed fold changes relative to the mean of three independent mock-treated control lines. Error bars denote standard error (n=3). Individual mock- (●) and JA-treated (■) values are shown. Statistical significance was determined by unpaired Student's *t*-tests (\*\*, P<0.01). Abbreviations: 1 cm, 1 cm immature green fruit; 2 cm, 2 cm immature green fruit; 3 cm, 3 cm immature green fruit; MG, mature green fruit; BR, breaker fruit; RR, red ripe (breaker + 10 days) fruit.

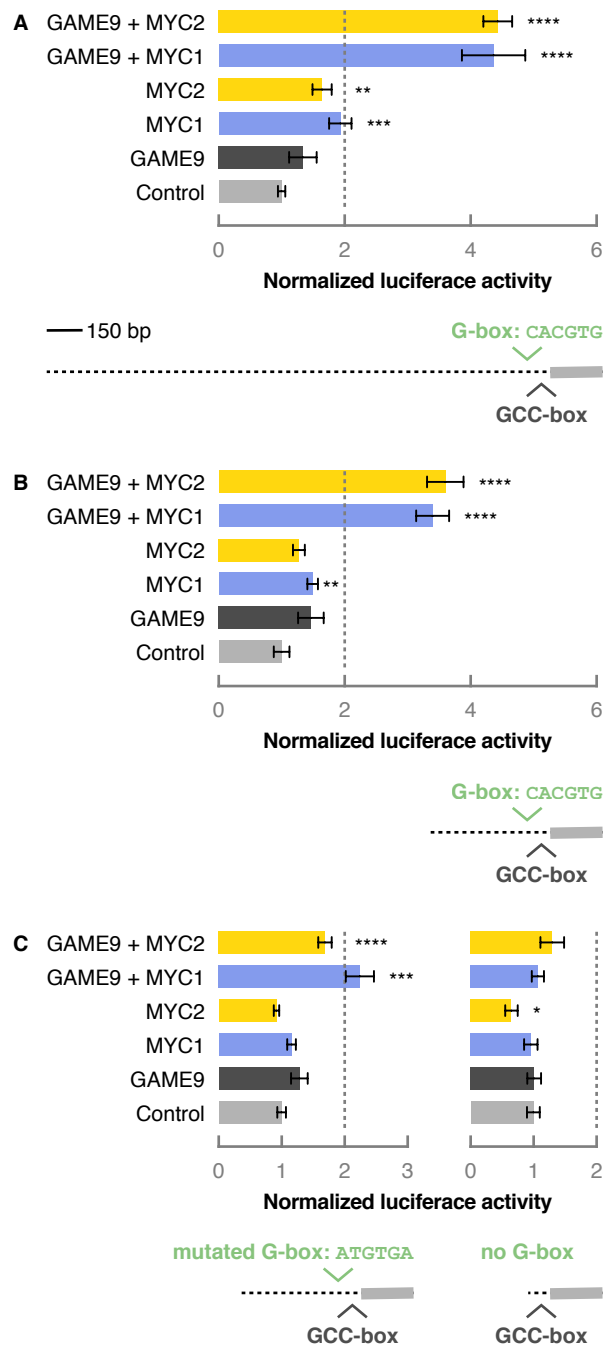

**Figure 4.** MYC1 and MYC2 transactivate the promoter of *C5-SD2* together with GAME9. (A-C) Tobacco BY-2 protoplasts were transfected with a *pC5-SD2(1549 bp)::fLUC* (A), *pC5-SD2(333 bp)::fLUC* (B), *pC5-SD2(333 bp with mutated G-box)::fLUC* or *pC5-SD2(207 bp without G-box)::fLUC* (C) reporter construct and effector constructs overexpressing *MYC1*, *MYC2*, *GAME9* or a combination thereof. A *pCaMV35S::rLUC* construct was co-transfected for normalization of fLUC activity. Bars represent mean fold changes relative to the mean of protoplasts transfected with a *pCaMV35S::GUS* control construct (grey bar). Dashed lines represent the 2-fold cut off for promoter transactivation. Error bars denote standard error (n = 8). Statistical significance was determined by unpaired Student's *t*-tests (\*, P<0.05; \*\*, P<0.01; \*\*\*, P<0.001; \*\*\*\*, P<0.0001). Abbreviations: BY-2, Bright Yellow-2; *pC5-SD2*, promoter of *C5-SD2*; *GUS*,  $\beta$ -glucuronidase.



**A** *MYC1* (Solyc08g005050.2) — 100 bp

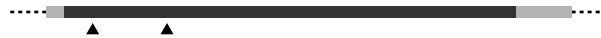

**B** Normalized log<sub>2</sub> fold change

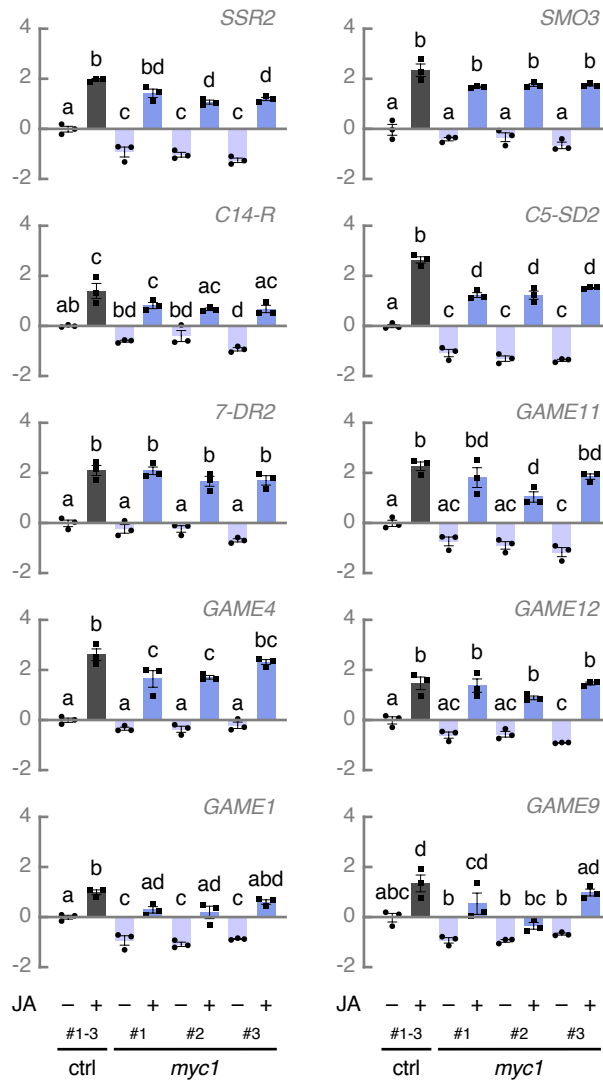

**C** Normalized accumulation

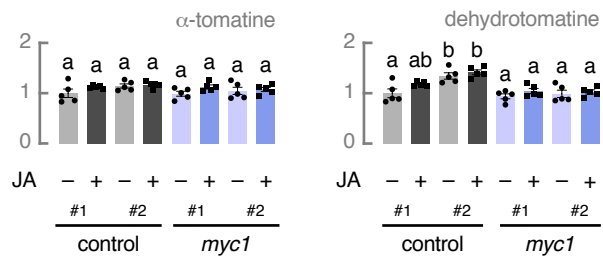

**Figure 5.** MYC1 regulates constitutive expression of SGA biosynthesis genes in tomato. (A) Schematic representation of *MYC1* with location of the CRISPR-Cas9 cleavage sites. The dark grey box represents the exon and light grey boxes represent the UTRs. Cas9 cleavage sites for two guide RNAs are indicated with arrowheads. (B) Relative expression of cholesterologenesis genes, SGA biosynthesis genes, and *GAME9* analyzed by qPCR. Control hairy root lines expressing *pCaMV35S::GUS* (grey bars) and *myc1* lines (blue bars) were treated for 24 h with 50  $\mu$ M of JA or an equal amount of ethanol. For control samples, cDNA of three biological replicates was pooled per independent line and treatment. Bars represent mean  $\log_2$ -transformed fold changes relative to the mean of three independent mock-treated control lines. Error bars denote standard error (n = 3). Individual mock- (●) and JA-treated (■) values are shown. Statistical significance was determined by ANOVA followed by Tukey post-hoc analysis (P < 0.05; indicated by different letters). (C) Relative accumulation of  $\alpha$ -tomatine and dehydrotomatine analyzed by LC-MS. Control hairy root lines expressing *pCaMV35S::GUS* (grey bars) and *myc1* lines (blue bars) were treated for 24 h with 50  $\mu$ M of JA or an equal amount of ethanol. Bars represent mean fold changes relative to the mean of mock-treated control<sup>#1</sup>. Error bars denote standard error (n=5). Individual mock- (●) and JA-treated (■) values are shown. Statistical significance was determined by ANOVA followed by Tukey post-hoc analysis (P < 0.05; indicated by different letters). Abbreviations: *SSR2*, *STEROL SIDE CHAIN REDUCTASE 2*; *SMO3*, *C-4 STEROL METHYL OXIDASE 3*; *C14-R*, *STEROL C-14 REDUCTASE*; *7-DR2*, *7-DEHYDROCHOLESTEROL REDUCTASE 2*; UTR, untranslated region; *GUS*,  $\beta$ -glucuronidase.

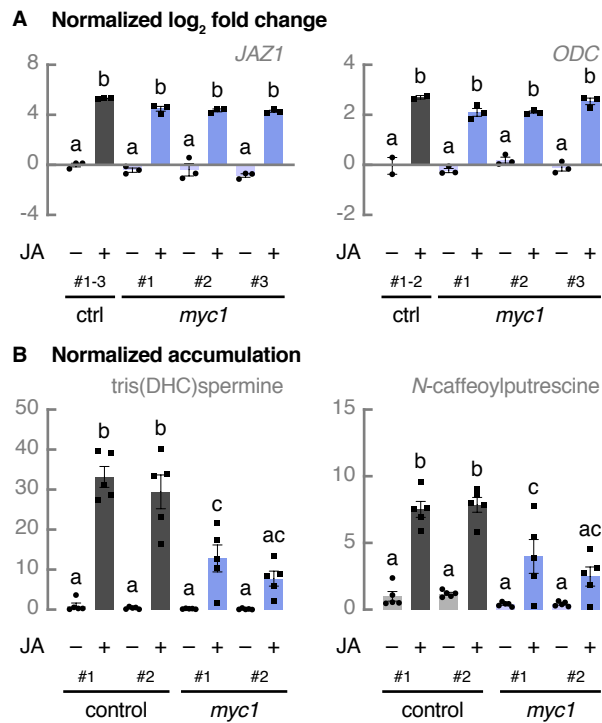

**Figure 6.** MYC1 helps ensure JA-induced polyamine biosynthesis in tomato. (A) Relative expression of *JAZ1* and *ODC* analyzed by qPCR. Control hairy root lines expressing *pCaMV35S::GUS* (grey bars) and *myc1* lines (blue bars) were treated for 24 h with 50  $\mu$ M of JA or an equal amount of ethanol. For control samples, cDNA of three biological replicates was pooled per independent line and treatment. Bars represent mean log<sub>2</sub>-transformed fold changes relative to the mean of three independent mock-treated control lines. Error bars denote standard error (n = 3). Individual mock- (●) and JA-treated (■) values are shown. Statistical significance was determined by ANOVA followed by Tukey post-hoc analysis (P<0.05; indicated by different letters). (B) Relative accumulation of tris(dihydrocaffeoyl)spermine and *N*-caffeoylputrescine analyzed by LC-MS. Control hairy root lines expressing *pCaMV35S::GUS* (grey bars) and *myc1* lines (blue bars) were treated for 24 h with 50  $\mu$ M of JA or an equal amount of ethanol. Bars represent mean fold changes relative to the mean of mock-treated control<sup>#1</sup>. Error bars denote standard error (n=5). Individual mock- (●) and JA-treated (■) values are shown. Statistical significance was determined by ANOVA followed by Tukey post-hoc analysis (P<0.05; indicated by different letters). Abbreviations: DHC, dihydrocaffeoyl; *GUS*,  $\beta$ -glucuronidase.

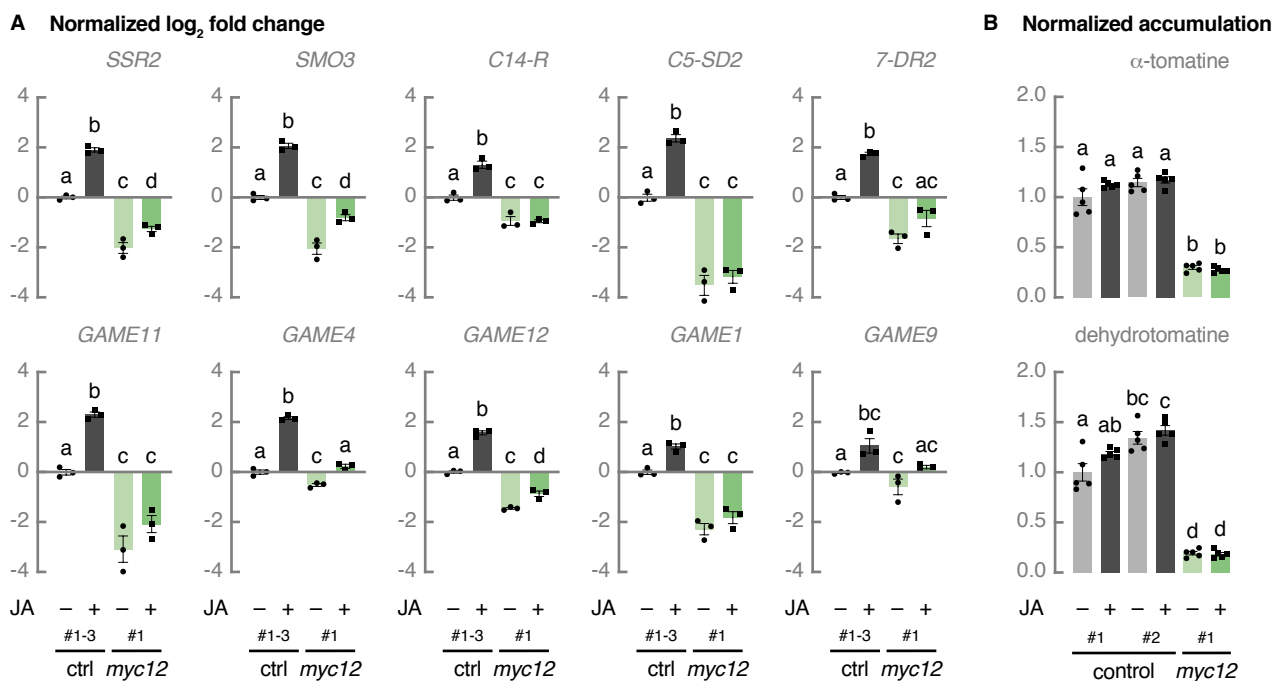

**Figure 7.** MYC1 and MYC2 redundantly regulate constitutive SGA biosynthesis in tomato. (A) Relative expression of cholesterologenesis genes, SGA biosynthesis genes, and *GAME9* analyzed by qPCR. Control hairy root lines expressing *pCaMV35S::GUS* (grey bars) and a *myc1 myc2* (*myc12*) line (green bars) were treated for 24 h with 50  $\mu$ M of JA or an equal amount of ethanol. For control samples, cDNA of three biological replicates was pooled per independent line and treatment. Bars represent mean log<sub>2</sub>-transformed fold changes relative to the mean of three independent mock-treated control lines. Error bars denote standard error (n=3). Individual mock- (●) and JA-treated (■) values are shown. Statistical significance was determined by ANOVA followed by Tukey post-hoc analysis (P<0.05; indicated by different letters). (B) Relative accumulation of  $\alpha$ -tomatine and dehydrotomatine analyzed by LC-MS. Control hairy root lines expressing *pCaMV35S::GUS* (grey bars) and a *myc1 myc2* (*myc12*) line (green bars) were treated for 24 h with 50  $\mu$ M of JA or an equal amount of ethanol. Bars represent mean fold changes relative to the mean of mock-treated control<sup>#1</sup>. Error bars denote standard error (n = 5). Individual mock- (●) and JA-treated (■) values are shown. Statistical significance was determined by ANOVA followed by Tukey post-hoc analysis (P < 0.05; indicated by different letters). Abbreviations: *SSR2*, *STEROL SIDE CHAIN REDUCTASE 2*; *SMO3*, *C-4 STEROL METHYL OXIDASE 3*; *C14-R*, *STEROL C-14 REDUCTASE*; *7-DR2*, *7-DEHYDROCHOLESTEROL REDUCTASE 2*; *GUS*,  $\beta$ -glucuronidase.

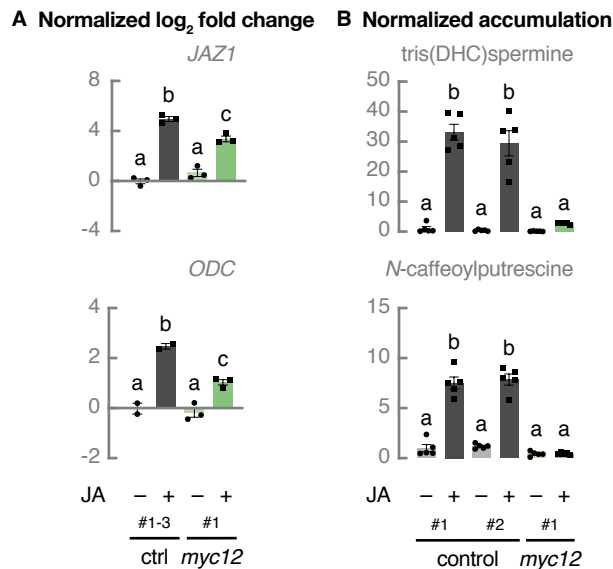

**Figure 8.** MYC1 and MYC2 redundantly regulate JA-induced polyamine accumulation in tomato. (A) Relative expression of *JAZ1* and *ODC* analyzed by qPCR. Control hairy root lines expressing *pCaMV35S::GUS* (grey bars) and a *myc1 myc2* (*myc12*) line (green bars) were treated for 24 h with 50  $\mu$ M of JA or an equal amount of ethanol. For control samples, cDNA of three biological replicates was pooled per independent line and treatment. Bars represent mean log<sub>2</sub>-transformed fold changes relative to the mean of three independent mock-treated control lines. Error bars denote standard error (n = 3). Individual mock- (●) and JA-treated (■) values are shown. Statistical significance was determined by ANOVA followed by Tukey post-hoc analysis (P<0.05; indicated by different letters). (B) Relative accumulation of tris(dihydrocaffeoyl)spermine and *N*-caffeoylputrescine analyzed by LC-MS. Control hairy root lines expressing *pCaMV35S::GUS* (grey bars) and a *myc1 myc2* (*myc12*) line (green bars) were treated for 24 h with 50  $\mu$ M of JA or an equal amount of ethanol. Bars represent mean fold changes relative to the mean of mock-treated control<sup>#1</sup>. Error bars denote standard error (n=5). Individual mock- (●) and JA-treated (■) values are shown. Statistical significance was determined by ANOVA followed by Tukey post-hoc analysis (P<0.05; indicated by different letters). Abbreviations: DHC, dihydrocaffeoyl; *GUS*,  $\beta$ -glucuronidase.

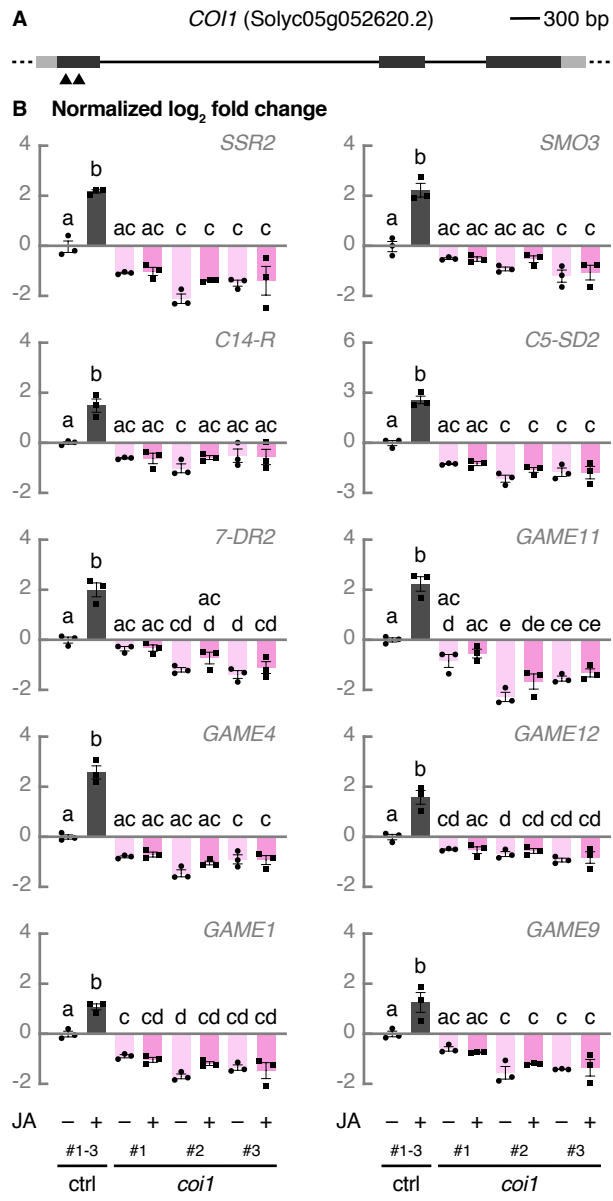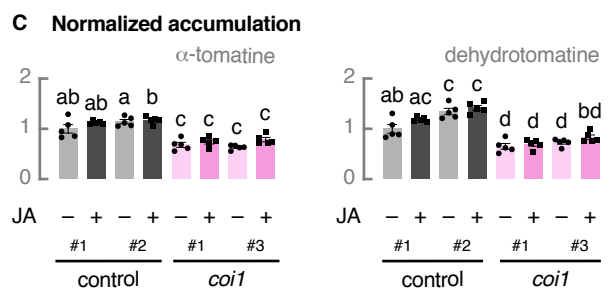

**Figure 9.** Constitutive SGA biosynthesis partially depends on COI1-mediated JA signaling. (A) Schematic representation of *COI1* with location of the CRISPR-Cas9 cleavage sites. Dark grey boxes represent exons, solid lines represent introns, and light grey boxes represent UTRs. Cas9 cleavage sites for two guide RNAs are indicated with arrowheads. (B) Relative expression of cholesterologenesis genes, SGA biosynthesis genes, and *GAME9* analyzed by qPCR. Control hairy root lines expressing *pCaMV35S::GUS* (grey bars) and *coil* lines (pink bars) were treated for 24 h with 50  $\mu$ M of JA or an equal amount of ethanol. For control samples, cDNA of three biological replicates was pooled per independent line and treatment. Bars represent mean log<sub>2</sub>-transformed fold changes relative to the mean of three independent mock-treated control lines. Error bars denote standard error (n=3). Individual mock- (●) and JA-treated (■) values are shown. Statistical significance was determined by ANOVA followed by Tukey post-hoc analysis (P < 0.05; indicated by different letters). (C) Relative accumulation of  $\alpha$ -tomatine and dehydrotomatine analyzed by LC-MS. Control hairy root lines expressing *pCaMV35S::GUS* (grey bars) and *coil* lines (pink bars) were treated for 24 h with 50  $\mu$ M of JA or an equal amount of ethanol. Bars represent mean fold changes relative to the mean of mock-treated control<sup>#1</sup>. Error bars denote standard error (n=5). Individual mock- (●) and JA-treated (■) values are shown. Statistical significance was determined by ANOVA followed by Tukey post-hoc analysis (P<0.05; indicated by different letters). Abbreviations: *SSR2*, *STEROL SIDE CHAIN REDUCTASE 2*; *SMO3*, *C-4 STEROL METHYL OXIDASE 3*; *C14-R*, *STEROL C-14 REDUCTASE*; *7-DR2*, *7-DEHYDROCHOLESTEROL REDUCTASE 2*; UTR, untranslated region; *GUS*,  $\beta$ -glucuronidase.

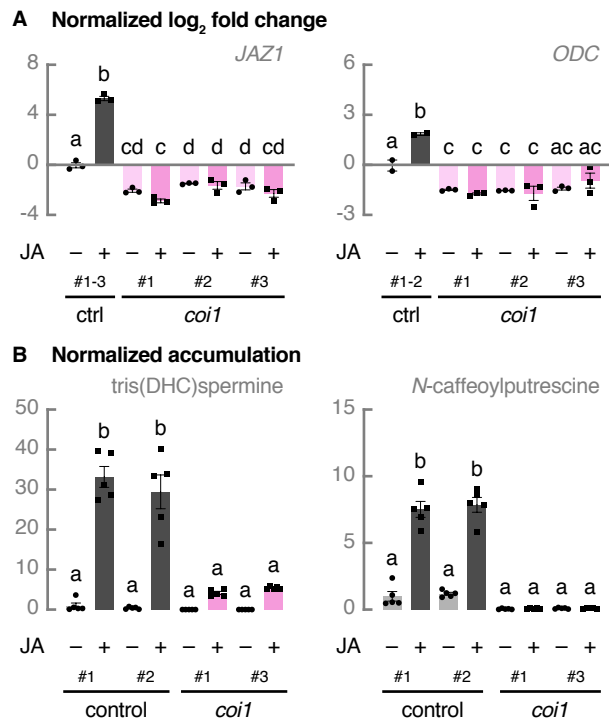

**Figure 10.** JA-induced polyamine biosynthesis depends on COI1-mediated JA signaling. (A) Relative expression of *JAZ1* and *ODC* analyzed by qPCR. Control hairy root lines expressing *pCaMV35S::GUS* (grey bars) and *coi1* lines (pink bars) were treated for 24 h with 50  $\mu$ M of JA or an equal amount of ethanol. For control samples, cDNA of three biological replicates was pooled per independent line and treatment. Bars represent mean log<sub>2</sub>-transformed fold changes relative to the mean of three independent mock-treated control lines. Error bars denote standard error (n = 3). Individual mock- (●) and JA-treated (■) values are shown. Statistical significance was determined by ANOVA followed by Tukey post-hoc analysis (P<0.05; indicated by different letters). (B) Relative accumulation of tris(dihydrocaffeoyl)spermine and *N*-caffeoylputrescine analyzed by LC-MS. Control hairy root lines expressing *pCaMV35S::GUS* (grey bars) and *coi1* lines (pink bars) were treated for 24 h with 50  $\mu$ M of JA or an equal amount of ethanol. Bars represent mean fold changes relative to the mean of mock-treated control<sup>#1</sup>. Error bars denote standard error (n=5). Individual mock- (●) and JA-treated (■) values are shown. Statistical significance was determined by ANOVA followed by Tukey post-hoc analysis (P<0.05; indicated by different letters). Abbreviations: DHC, dihydrocaffeoyl; *GUS*,  $\beta$ -glucuronidase.



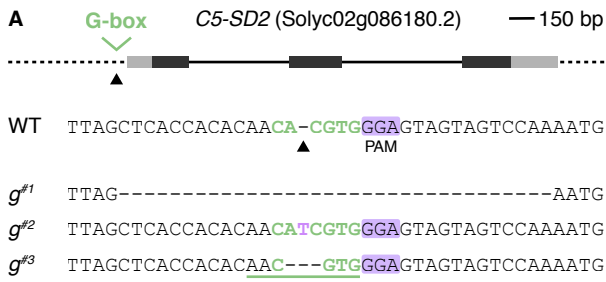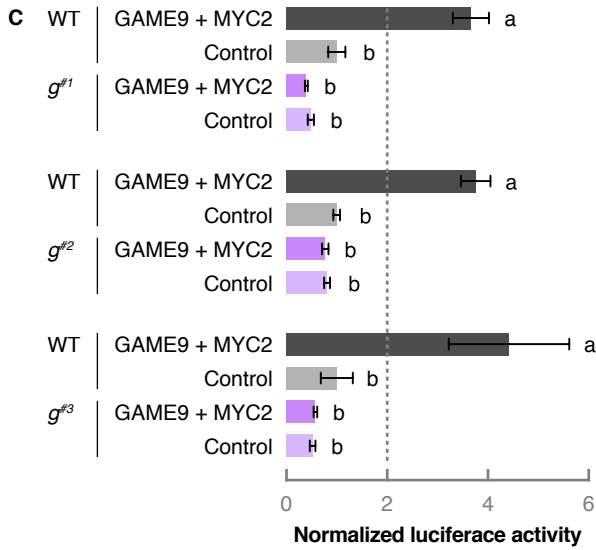

**D Normalized accumulation**

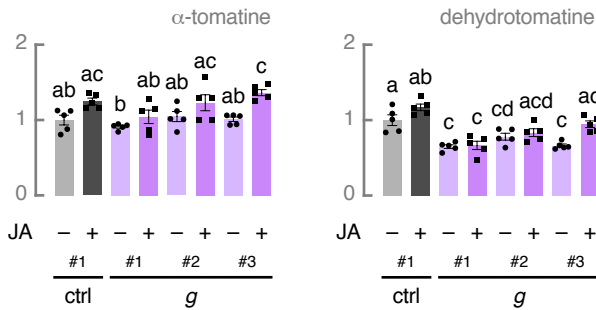

**B Normalized log<sub>2</sub> fold change**

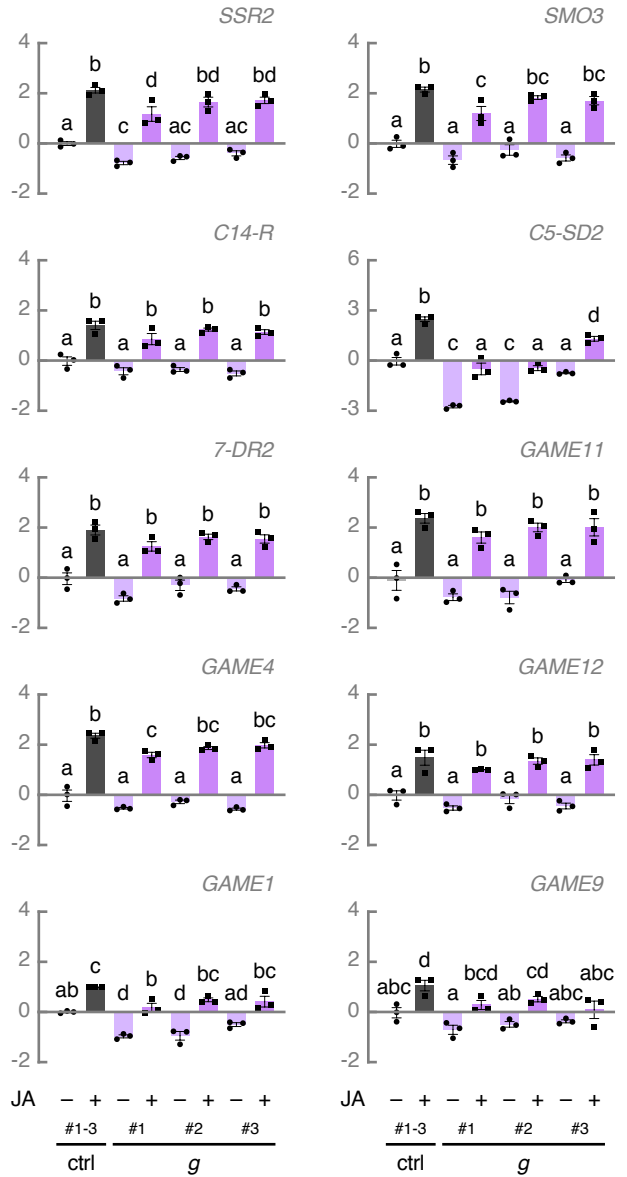

**Figure 11.** Genome editing of a G-box decreases constitutive *C5-SD2* expression. (A) Schematic representation of *C5-SD2* with location of the CRISPR-Cas9 cleavage site and G-box mutant sequences. Dark grey boxes represent exons, solid lines represent introns, and light grey boxes represent UTRs. The Cas9 cleavage site for the guide RNA targeting the G-box is indicated with an arrowhead. Sequences of three independent G-box mutant (*g*) lines are shown. G-box sequence is indicated in green font, the Cas9(VQR) PAM is marked in purple, inserted bases are shown in purple, deleted bases are replaced by a dash, and sequence gap length is shown between parentheses. Bases that make up an alternative G-box are green underlined. (B) Relative expression of cholesterologenesis genes, SGA biosynthesis genes, and *GAME9* analyzed by qPCR. Control hairy root lines expressing *pCaMV35S::GUS* (grey bars) and *g* lines (purple bars) were treated for 24 h with 50  $\mu$ M of JA or an equal amount of ethanol. For control samples, cDNA of three biological replicates was pooled per independent line and treatment. Bars represent mean  $\log_2$ -transformed fold changes relative to the mean of three independent mock-treated control lines. Error bars denote standard error (n=3). Individual mock- (●) and JA-treated (■) values are shown. Statistical significance was determined by ANOVA followed by Tukey post-hoc analysis (P<0.05; indicated by different letters). (C) Tobacco BY-2 protoplasts were transfected with a *pC5-SD2(g<sup>#1</sup>; 1406 bp)::fLUC*, *pC5-SD2(g<sup>#2</sup>; 1406 bp)::fLUC* or *pC5-SD2(g<sup>#3</sup>; 1406 bp)::fLUC* reporter construct and effector constructs overexpressing *MYC2* and *GAME9*. A *pCaMV35S::rLUC* construct was co-transfected for normalization of fLUC activity. Bars represent mean fold changes relative to the mean of protoplasts transfected with a *pC5-SD2(WT; 1406 bp)::fLUC* reporter construct and a *pCaMV35S::GUS* control construct. Dashed lines represent the 2-fold cut off for promoter transactivation. Error bars denote standard error (n = 8). Statistical significance was determined by ANOVA followed by Tukey post-hoc analysis (P<0.05; indicated by different letters). (D) Relative accumulation of  $\alpha$ -tomatine and dehydrotomatine analyzed by LC-MS. Control hairy root lines expressing *pCaMV35S::GUS* (grey bars) and *g* lines (purple bars) were treated for 24 h with 50  $\mu$ M of JA or an equal amount of ethanol. Bars represent mean fold changes relative to the mean of mock-treated control<sup>#1</sup>. Error bars denote standard error (n=5). Individual mock- (●) and JA-treated (■) values are shown. Statistical significance was determined by ANOVA followed by Tukey post-hoc analysis (P<0.05; indicated by different letters). Abbreviations: *SSR2*, *STEROL SIDE CHAIN REDUCTASE 2*; *SMO3*, *C-4 STEROL METHYL OXIDASE 3*; *C14-R*, *STEROL C-14 REDUCTASE*; *7-DR2*, *7-DEHYDROCHOLESTEROL REDUCTASE 2*; UTR, untranslated region; PAM, protospacer adjacent motif; *GUS*,  $\beta$ -glucuronidase; BY-2, Bright Yellow-2; *pC5-SD2*, promoter of *C5-SD2*.

## Parsed Citations

- Abdelkareem, A., Thagun, C., Nakayasu, M., Mizutani, M., Hashimoto, T., and Shoji, T. (2017).** Jasmonate-induced biosynthesis of steroidal glycoalkaloids depends on COI1 proteins in tomato. *Biochem. Biophys. Res. Commun.* 489: 206-210.  
Pubmed: [Author and Title](#)  
Google Scholar: [Author Only](#) [Title Only](#) [Author and Title](#)
- Acosta, C., Pérez-Amador, M.A., Carbonell, J., and Granell, A. (2005).** The two ways to produce putrescine in tomato are cell-specific during normal development. *Plant Sci.* 168: 1053-1057.  
Pubmed: [Author and Title](#)  
Google Scholar: [Author Only](#) [Title Only](#) [Author and Title](#)
- Arvidsson, S., Kwasniewski, M., Riaño-Pachón, D.M., and Mueller-Roeber, B. (2008).** QuantPrime - a flexible tool for reliable high-throughput primer design for quantitative PCR. *BMC Bioinformatics* 9: 465.  
Pubmed: [Author and Title](#)  
Google Scholar: [Author Only](#) [Title Only](#) [Author and Title](#)
- Boter, M., Ruíz-Rivero, O., Abdeen, A., and Prat, S. (2004).** Conserved MYC transcription factors play a key role in jasmonate signaling both in tomato and *Arabidopsis*. *Genes Dev.* 18: 1577-1591.  
Pubmed: [Author and Title](#)  
Google Scholar: [Author Only](#) [Title Only](#) [Author and Title](#)
- Brkljacic, J., and Grotewold, E. (2017).** Combinatorial control of plant gene expression. *Biochim. Biophys. Acta - Gene Regul. Mech.* 1860: 31-40.  
Pubmed: [Author and Title](#)  
Google Scholar: [Author Only](#) [Title Only](#) [Author and Title](#)
- Cárdenas, P.D., et al. (2016).** GAME9 regulates the biosynthesis of steroidal alkaloids and upstream isoprenoids in the plant mevalonate pathway. *Nat. Commun.* 7: 10654.  
Pubmed: [Author and Title](#)  
Google Scholar: [Author Only](#) [Title Only](#) [Author and Title](#)
- Cárdenas, P.D., et al. (2019).** Pathways to defense metabolites and evading fruit bitterness in genus *Solanum* evolved through 2-oxoglutarate-dependent dioxygenases. *Nat. Commun.* 10: 5169.  
Pubmed: [Author and Title](#)  
Google Scholar: [Author Only](#) [Title Only](#) [Author and Title](#)
- Chen, H., Jones, A.D., and Howe, G.A. (2006).** Constitutive activation of the jasmonate signaling pathway enhances the production of secondary metabolites in tomato. *FEBS Lett.* 580: 2540-2546.  
Pubmed: [Author and Title](#)  
Google Scholar: [Author Only](#) [Title Only](#) [Author and Title](#)
- Chini, A., Gimenez-Ibanez, S., Goossens, A., and Solano, R. (2016).** Redundancy and specificity in jasmonate signalling. *Curr. Opin. Plant Biol.* 33: 147-156.  
Pubmed: [Author and Title](#)  
Google Scholar: [Author Only](#) [Title Only](#) [Author and Title](#)
- Chini, A., Ben-Romdhane, W., Hassairi, A., and Aboul-Soud, M.A.M. (2017).** Identification of TIFY/JAZ family genes in *Solanum lycopersicum* and their regulation in response to abiotic stresses. *PLoS ONE* 12: e0177381.  
Pubmed: [Author and Title](#)  
Google Scholar: [Author Only](#) [Title Only](#) [Author and Title](#)
- Chini, A., Fonseca, S., Fernández, G., Adie, B., Chico, J.M., Lorenzo, O., García-Casado, G., López-Vidriero, I., Lozano, F.M., Ponce, M.R., Micol, J.L., and Solano, R. (2007).** The JAZ family of repressors is the missing link in jasmonate signalling. *Nature* 448: 666-671.  
Pubmed: [Author and Title](#)  
Google Scholar: [Author Only](#) [Title Only](#) [Author and Title](#)
- De Geyter, N., Gholami, A., Goormachtig, S., and Goossens, A. (2012).** Transcriptional machineries in jasmonate-elicited plant secondary metabolism. *Trends Plant Sci.* 17: 349-359.  
Pubmed: [Author and Title](#)  
Google Scholar: [Author Only](#) [Title Only](#) [Author and Title](#)
- Du, M., et al. (2017).** MYC2 orchestrates a hierarchical transcriptional cascade that regulates jasmonate-mediated plant immunity in tomato. *Plant Cell* 29: 1883-1906.  
Pubmed: [Author and Title](#)  
Google Scholar: [Author Only](#) [Title Only](#) [Author and Title](#)
- Fauser, F., Schiml, S., and Puchta, H. (2014).** Both CRISPR/Cas-based nucleases and nickases can be used efficiently for genome engineering in *Arabidopsis thaliana*. *Plant J.* 79: 348-359.  
Pubmed: [Author and Title](#)

- Google Scholar: [Author Only](#) [Title Only](#) [Author and Title](#)
- Fonseca, S., Chini, A., Hamberg, M., Adie, B., Porzel, A., Kramell, R., Miersch, O., Wasternack, C., and Solano, R. (2009).** (+)-7-iso-Jasmonoyl-L-iso-leucine is the endogenous bioactive jasmonate. *Nat. Chem. Biol.* 5: 344-350.  
Pubmed: [Author and Title](#)  
Google Scholar: [Author Only](#) [Title Only](#) [Author and Title](#)
- Friedman, M. (2002).** Tomato glycoalkaloids: role in the plant and in the diet. *J. Agric. Food Chem.* 50: 5751-5780.  
Pubmed: [Author and Title](#)  
Google Scholar: [Author Only](#) [Title Only](#) [Author and Title](#)
- Friedman, M., and Levin, C.E. (1998).** Dehydrotomatine content in tomatoes. *J. Agric. Food Chem.* 46: 4571-4576.  
Pubmed: [Author and Title](#)  
Google Scholar: [Author Only](#) [Title Only](#) [Author and Title](#)
- Goossens, J., Mertens, J., and Goossens, A (2017).** Role and functioning of bHLH transcription factors in jasmonate signalling. *J. Exp. Bot.* 68: 1333-1347.  
Pubmed: [Author and Title](#)  
Google Scholar: [Author Only](#) [Title Only](#) [Author and Title](#)
- Haeussler, M., Schönig, K., Eckert, H., Eschstruth, A., Mianné, J., Renaud, J.-B., Schneider-Maunoury, S., Shkumatava, A., Teboul, L., Kent, J., Joly, J.-S., and Concordet, J.-P. (2016).** Evaluation of off-target and on-target scoring algorithms and integration into the guide RNA selection tool CRISPOR. *Genome Biol.* 17: 148.  
Pubmed: [Author and Title](#)  
Google Scholar: [Author Only](#) [Title Only](#) [Author and Title](#)
- Harvey, J.J.W., Lincoln, J.E., and Gilchrist, D.G. (2008).** Programmed cell death suppression in transformed plant tissue by tomato cDNAs identified from an *Agrobacterium rhizogenes*-based functional screen. *Mol. Genet. Genomics* 279: 509-521.  
Pubmed: [Author and Title](#)  
Google Scholar: [Author Only](#) [Title Only](#) [Author and Title](#)
- Itkin, M., et al. (2011).** GLYCOALKALOID METABOLISM1 is required for steroidal alkaloid glycosylation and prevention of phytotoxicity in tomato. *Plant Cell* 23: 4507-4525.  
Pubmed: [Author and Title](#)  
Google Scholar: [Author Only](#) [Title Only](#) [Author and Title](#)
- Itkin, M., et al. (2013).** Biosynthesis of antinutritional alkaloids in solanaceous crops is mediated by clustered genes. *Science* 341: 175-179.  
Pubmed: [Author and Title](#)  
Google Scholar: [Author Only](#) [Title Only](#) [Author and Title](#)
- Kajikawa, M., Sierro, N., Kawaguchi, H., Bakaher, N., Ivanov, N.V., Hashimoto, T., and Shoji, T. (2017).** Genomic insights into the evolution of the nicotine biosynthesis pathway in tobacco. *Plant Physiol.* 174: 999-1011.  
Pubmed: [Author and Title](#)  
Google Scholar: [Author Only](#) [Title Only](#) [Author and Title](#)
- Kazan, K., and Manners, J.M. (2013).** MYC2: the master in action. *Mol. Plant* 6: 686-703.  
Pubmed: [Author and Title](#)  
Google Scholar: [Author Only](#) [Title Only](#) [Author and Title](#)
- Kleinstiver, B.P., Prew, M.S., Tsai, S.Q., Topkar, V.V., Nguyen, N.T., Zheng, Z., Gonzales, A.P.W., Li, Z., Peterson, R.T., Yeh, J.-R.J., Aryee, M.J., and Joung, J.K. (2015).** Engineered CRISPR-Cas9 nucleases with altered PAM specificities. *Nature* 523: 481-485.  
Pubmed: [Author and Title](#)  
Google Scholar: [Author Only](#) [Title Only](#) [Author and Title](#)
- Kozukue, N., Han, J.-S., Lee, K.-R., and Friedman, M. (2004).** Dehydrotomatine and  $\alpha$ -tomatine content in tomato fruits and vegetative plant tissues. *J. Agric. Food Chem.* 52: 2079-2083.  
Pubmed: [Author and Title](#)  
Google Scholar: [Author Only](#) [Title Only](#) [Author and Title](#)
- Kumar, S., Stecher, G., and Tamura, K. (2016).** MEGA7: Molecular Evolutionary Genetics Analysis version 7.0 for bigger datasets. *Mol. Biol. Evol.* 33: 1870-1874.  
Pubmed: [Author and Title](#)  
Google Scholar: [Author Only](#) [Title Only](#) [Author and Title](#)
- Le, S.Q., and Gascuel, O. (2008).** An improved general amino acid replacement matrix. *Mol. Biol. Evol.* 25: 1307-1320.  
Pubmed: [Author and Title](#)  
Google Scholar: [Author Only](#) [Title Only](#) [Author and Title](#)
- Livak, K.J., and Schmittgen, T.D. (2001).** Analysis of relative gene expression data using real-time quantitative PCR and the 2- $\Delta\Delta$ CT method. *Methods* 25: 402-408.  
Pubmed: [Author and Title](#)

Google Scholar: [Author Only](#) [Title Only](#) [Author and Title](#)

**Ma, Z., Zhu, P., Shi, H., Guo, L., Zhang, Q., Chen, Y., Chen, S., Zhang, Z., Peng, J., and Chen, J. (2019).** PTC-bearing mRNA elicits a genetic compensation response via *Upf3a* and COMPASS components. *Nature* 568: 259-263.

Pubmed: [Author and Title](#)

Google Scholar: [Author Only](#) [Title Only](#) [Author and Title](#)

**Mertens, J., Van Moerkercke, A., Vanden Bossche, R., Pollier, J., and Goossens, A. (2016).** Clade IVa basic helix-loop-helix transcription factors form part of a conserved jasmonate signaling circuit for the regulation of bioactive plant terpenoid biosynthesis. *Plant Cell Physiol.* 57: 2564-2575.

Pubmed: [Author and Title](#)

Google Scholar: [Author Only](#) [Title Only](#) [Author and Title](#)

**Montero-Vargas, J.M., Casarrubias-Castillo, K., Martínez-Gallardo, N., Ordaz-Ortiz, J.J., Délano-Frier, J.P., and Winkler, R. (2018).** Modulation of steroidal glycoalkaloid biosynthesis in tomato (*Solanum lycopersicum*) by jasmonic acid. *Plant Sci.* 277: 155-165.

Pubmed: [Author and Title](#)

Google Scholar: [Author Only](#) [Title Only](#) [Author and Title](#)

**Nakayasu, M., Shioya, N., Shikata, M., Thagun, C., Abdelkareem, A., Okabe, Y., Ariizumi, T., Arimura, G.-i., Mizutani, M., Ezura, H., Hashimoto, T., and Shoji, T. (2018).** JRE4 is a master transcriptional regulator of defense-related steroidal glycoalkaloids in tomato. *Plant J.* 94: 975-990.

Pubmed: [Author and Title](#)

Google Scholar: [Author Only](#) [Title Only](#) [Author and Title](#)

**Nakayasu, M., et al. (2020).** Identification of  $\alpha$ -tomatine 23-hydroxylase involved in the detoxification of a bitter glycoalkaloid. *Plant Cell Physiol.*, in press (10.1093/pcp/pcz224).

Pubmed: [Author and Title](#)

Google Scholar: [Author Only](#) [Title Only](#) [Author and Title](#)

**Oberpichler, I., Rosen, R., Rasouly, A., Vugman, M., Ron, E.Z., and Lamparter, T. (2008).** Light affects motility and infectivity of *Agrobacterium tumefaciens*. *Environ. Microbiol.* 10: 2020-2029.

Pubmed: [Author and Title](#)

Google Scholar: [Author Only](#) [Title Only](#) [Author and Title](#)

**Pauwels, L., De Clercq, R., Goossens, J., Iñigo, S., Williams, C., Ron, M., Britt, A., and Goossens, A. (2018).** A dual sgRNA approach for functional genomics in *Arabidopsis thaliana*. *G3: Genes, Genomes, Genet.* 8: 2603-2615.

Pubmed: [Author and Title](#)

Google Scholar: [Author Only](#) [Title Only](#) [Author and Title](#)

**Ritter, A., et al. (2017).** The transcriptional repressor complex FRS7-FRS12 regulates flowering time and growth in *Arabidopsis*. *Nat. Commun.* 8: 15235.

Pubmed: [Author and Title](#)

Google Scholar: [Author Only](#) [Title Only](#) [Author and Title](#)

**Ron, M., et al. (2014).** Hairy root transformation using *Agrobacterium* rhizogenes as a tool for exploring cell type-specific gene expression and function using tomato as a model. *Plant Physiol.* 166: 455-469.

Pubmed: [Author and Title](#)

Google Scholar: [Author Only](#) [Title Only](#) [Author and Title](#)

**Sawai, S., et al. (2014).** Sterol side chain reductase 2 is a key enzyme in the biosynthesis of cholesterol, the common precursor of toxic steroidal glycoalkaloids in potato. *Plant Cell* 26: 3763-3774.

Pubmed: [Author and Title](#)

Google Scholar: [Author Only](#) [Title Only](#) [Author and Title](#)

**Schweizer, F., Fernández-Calvo, P., Zander, M., Diez-Diaz, M., Fonseca, S., Glauser, G., Lewsey, M.G., Ecker, J.R., Solano, R., and Reymond, P. (2013).** *Arabidopsis* basic helix-loop-helix transcription factors MYC2, MYC3, and MYC4 regulate glucosinolate biosynthesis, insect performance, and feeding behavior. *Plant Cell* 25: 3117-3132.

Pubmed: [Author and Title](#)

Google Scholar: [Author Only](#) [Title Only](#) [Author and Title](#)

**Sheard, L.B., et al. (2010).** Jasmonate perception by inositol-phosphate-potentiated COI1-JAZ co-receptor. *Nature* 468: 400-405.

Pubmed: [Author and Title](#)

Google Scholar: [Author Only](#) [Title Only](#) [Author and Title](#)

**Shoji, T. (2019).** The recruitment model of metabolic evolution: jasmonate-responsive transcription factors and a conceptual model for the evolution of metabolic pathways. *Front. Plant Sci.* 10: 560.

Pubmed: [Author and Title](#)

Google Scholar: [Author Only](#) [Title Only](#) [Author and Title](#)

**Shoji, T., and Hashimoto, T. (2011).** Tobacco MYC2 regulates jasmonate-inducible nicotine biosynthesis genes directly and by way of the NIC2-locus ERF genes. *Plant Cell Physiol.* 52: 1117-1130.

Pubmed: [Author and Title](#)

Google Scholar: [Author Only](#) [Title Only](#) [Author and Title](#)

**Shoji, T., Ogawa, T., and Hashimoto, T. (2008). Jasmonate-induced nicotine formation in tobacco is mediated by tobacco COI1 and JAZ genes. *Plant Cell Physiol.* 49: 1003-1012.**

Pubmed: [Author and Title](#)

Google Scholar: [Author Only](#) [Title Only](#) [Author and Title](#)

**Shoji, T., Kajikawa, M., and Hashimoto, T. (2010). Clustered transcription factor genes regulate nicotine biosynthesis in tobacco. *Plant Cell* 22: 3390-3409.**

Pubmed: [Author and Title](#)

Google Scholar: [Author Only](#) [Title Only](#) [Author and Title](#)

**Sonawane, P.D., et al. (2018). Short-chain dehydrogenase/reductase governs steroidal specialized metabolites structural diversity and toxicity in the genus *Solanum*. *Proc. Natl. Acad. Sci. USA* 115: E5419-E5428.**

Pubmed: [Author and Title](#)

Google Scholar: [Author Only](#) [Title Only](#) [Author and Title](#)

**Sonawane, P.D., et al. (2016). Plant cholesterol biosynthetic pathway overlaps with phytosterol metabolism. *Nat. Plants* 3: 16205.**

Pubmed: [Author and Title](#)

Google Scholar: [Author Only](#) [Title Only](#) [Author and Title](#)

**Spyropoulou, E.A., Haring, M.A., and Schuurink, R.C. (2014). RNA sequencing on *Solanum lycopersicum* trichomes identifies transcription factors that activate terpene synthase promoters. *BMC Genomics* 15: 402.**

Pubmed: [Author and Title](#)

Google Scholar: [Author Only](#) [Title Only](#) [Author and Title](#)

**Sun, J.-Q., Jiang, H.-L., and Li, C.-Y. (2011). Systemin/jasmonate-mediated systemic defense signaling in tomato. *Mol. Plant* 4: 607-615.**

Pubmed: [Author and Title](#)

Google Scholar: [Author Only](#) [Title Only](#) [Author and Title](#)

**Swinnen, G., Jacobs, T., Pauwels, L., and Goossens, A. (2020). CRISPR-Cas-mediated gene knockout in tomato. *Methods Mol. Biol.* 2083: 321-341.**

Pubmed: [Author and Title](#)

Google Scholar: [Author Only](#) [Title Only](#) [Author and Title](#)

**Thagun, C., et al. (2016). Jasmonate-responsive ERF transcription factors regulate steroidal glycoalkaloid biosynthesis in tomato. *Plant Cell Physiol.* 57: 961-975.**

Pubmed: [Author and Title](#)

Google Scholar: [Author Only](#) [Title Only](#) [Author and Title](#)

**Thines, B., Katsir, L., Melotto, M., Niu, Y., Mandaokar, A., Liu, G., Nomura, K., He, S.Y., Howe, G.A., and Browse, J. (2007). JAZ repressor proteins are targets of the SCFCO1 complex during jasmonate signalling. *Nature* 448: 661-665.**

Pubmed: [Author and Title](#)

Google Scholar: [Author Only](#) [Title Only](#) [Author and Title](#)

**Townsley, B.T., Covington, M.F., Ichihashi, Y., Zumstein, K., and Sinha, N.R. (2015). BrAD-seq: Breath Adapter Directional sequencing: a streamlined, ultra-simple and fast library preparation protocol for strand specific mRNA library construction. *Front. Plant Sci.* 6: 366.**

Pubmed: [Author and Title](#)

Google Scholar: [Author Only](#) [Title Only](#) [Author and Title](#)

**Van Bel, M., Diels, T., Vancaester, E., Kreft, L., Botzki, A., Van de Peer, Y., Coppens, F., and Vandepoele, K. (2018). PLAZA4.0: an integrative resource for functional, evolutionary and comparative plant genomics. *Nucleic Acids Res.* 46: D1190-D1196.**

Pubmed: [Author and Title](#)

Google Scholar: [Author Only](#) [Title Only](#) [Author and Title](#)

**Vanden Bossche, R., Demedts, B., Vanderhaeghen, R., and Goossens, A. (2013). Transient expression assays in tobacco protoplasts. *Methods Mol. Biol.* 1011: 227-239.**

Pubmed: [Author and Title](#)

Google Scholar: [Author Only](#) [Title Only](#) [Author and Title](#)

**Vanholme, R., et al. (2013). Caffeoyl shikimate esterase (CSE) is an enzyme in the lignin biosynthetic pathway in *Arabidopsis*. *Science* 341: 1103-1106.**

Pubmed: [Author and Title](#)

Google Scholar: [Author Only](#) [Title Only](#) [Author and Title](#)

**Wasternack, C., and Strnad, M. (2019). Jasmonates are signals in the biosynthesis of secondary metabolites - Pathways, transcription factors and applied aspects - A brief review. *New Biotechnol.* 48: 1-11.**

Pubmed: [Author and Title](#)

Google Scholar: [Author Only](#) [Title Only](#) [Author and Title](#)

**Xu, J., van Herwijnen, Z.O., Dräger, D.B., Sui, C., Haring, M.A., and Schuurink, R.C. (2018). SIMYC1 regulates type VI glandular trichome formation and terpene biosynthesis in tomato glandular cells. *Plant Cell* 30: 2988-3005.**

Pubmed: [Author and Title](#)

Google Scholar: [Author Only](#) [Title Only](#) [Author and Title](#)

**Xu, S., et al. (2017). Wild tobacco genomes reveal the evolution of nicotine biosynthesis. *Proc. Natl. Acad. Sci. USA* 114: 6133-6138.**

Pubmed: [Author and Title](#)

Google Scholar: [Author Only](#) [Title Only](#) [Author and Title](#)

**Yamanaka, T., Vincken, J.-P., Zuilhof, H., Legger, A., Takada, N., and Gruppen, H. (2009). C22 Isomerization in  $\alpha$ -tomatine-to-esculeoside a conversion during tomato ripening is driven by C27 hydroxylation of triterpenoidal skeleton. *J. Agric. Food Chem* 57: 3786-3791.**

Pubmed: [Author and Title](#)

Google Scholar: [Author Only](#) [Title Only](#) [Author and Title](#)

**Yan, J., Yao, R., Chen, L., Li, S., Gu, M., Nan, F., and Xie, D. (2018). Dynamic perception of jasmonates by the F-box protein CO11. *Mol. Plant* 11: 1237-1247.**

Pubmed: [Author and Title](#)

Google Scholar: [Author Only](#) [Title Only](#) [Author and Title](#)

**Yan, J., Zhang, C., Gu, M., Bai, Z., Zhang, W., Qi, T., Cheng, Z., Peng, W., Luo, H., Nan, F., Wang, Z., and Xie, D. (2009). The *Arabidopsis* CORONATINE INSENSITIVE1 protein is a jasmonate receptor. *Plant Cell* 21: 2220-2236.**

Pubmed: [Author and Title](#)

Google Scholar: [Author Only](#) [Title Only](#) [Author and Title](#)

**Zouine, M., Maza, E., Djari, A., Lauvernier, M., Frasse, P., Smouni, A., Pirrello, J., and Bouzayen, M. (2017). TomExpress, a unified tomato RNA-Seq platform for visualization of expression data, clustering and correlation networks. *Plant J.* 92: 727-735.**

Pubmed: [Author and Title](#)

Google Scholar: [Author Only](#) [Title Only](#) [Author and Title](#)
